# Supplementary material for: Facile synthesis and separation of E/Z isomers of aromatic-substituted tetraphenylethylene for investigating their fluorescent properties via single crystal analysis
Source: Royal Society of Chemistry journal article supplement (doi:10.1039/c9tc00446g), 2019-01-01
Supplement: c9tc00446g1.pdf [file c9tc00446g1.pdf]

## **Supporting information**

### **Facile synthesis and separation of E/Z isomerization of aromatic-substituted tetraphenylethylene for investigating their fluorescent properties via single crystal analysis**

Zhixiang Lu, Shaoxiong Yang, Xiaolan Liu, Yu Qin, Shuhan Lu, Yanxiong Liu, Ruidun Zhao, Liyan Zheng\* and Hongbin Zhang \*

Key Laboratory of Medicinal Chemistry for Natural Resource (Yunnan University), Ministry of Education, Functional Molecules Analysis and Biotransformation key laboratory of Universities in Yunnan Province, School of Chemical Science and Technology, Yunnan University, Kunming, Yunnan 650091, China.

E-mail: zhengliyan@ynu.edu.cn (L. Zheng), zhanghb@ynu.edu.cn (H. Zhang).

## Table of Contents

|                                                                                   |       |
|-----------------------------------------------------------------------------------|-------|
| <b>Fig. S1-42</b> NMR and high-resolution mass spectrum of all compounds.....     | 7-27  |
| <b>Fig. S43</b> FTIR spectrum of all compounds.....                               | 28    |
| <b>Fig. S44</b> Crystal structures of E/Z isomers.....                            | 29    |
| <b>Fig. S45-82</b> NOESY-NMR and COSY-NMR of E/Z isomers.....                     | 30-48 |
| <b>Fig. S83</b> Single crystal fluorescence pictures of E/Z isomers.....          | 49    |
| <b>Fig. S84</b> Fluorescent spectra of all compounds in solution.....             | 50-51 |
| <b>Fig. S85</b> Fluorescent spectra of all compounds in solid.....                | 52-53 |
| <b>Fig. S86</b> The red-shifted wavelength histogram of all Z/E isomers.....      | 53    |
| <b>Fig. S87</b> UV absorption spectra of all compounds in solid.....              | 54-55 |
| <b>Table S1-6</b> Spectroscopic data for all compounds.....                       | 55-57 |
| <b>Fig. S88</b> Fluorescence lifetime of all compounds.....                       | 57-59 |
| <b>Fig. S89</b> The non-radiative rate constant histogram of all Z/E isomers..... | 59    |
| <b>Fig. S90</b> XRD patterns of all compounds.....                                | 60-61 |
| <b>Fig. S91</b> Energy levels of LUMO and HOMO of E/Z isomers.....                | 61-62 |
| <b>Fig. S92</b> Packing structures of single crystal about E/Z isomers.....       | 63    |
| <b>Fig. S93</b> Intermolecular interactions of E/Z isomers.....                   | 64-65 |

## Materials.

4-Hydroxybenzophenone, Titanium tetrachloride, Anhydrous tetrahydrofuran, 2-(Bromomethyl) pyridine hydrobromide, 3-(Bromomethyl) pyridine hydrobromide, 4-(Bromomethyl) pyridine hydrobromide, 4-Chloromethyl-2-methylthiazole hydrochloride, 4-(Chloromethyl)-3,5-dimethylisoxazole hydrochloride, Benzyl bromide, 1-(Bromomethyl)naphthalene, 2-(Chloromethyl)thiophene, Potassium tert-butanolate, Methanol-D<sub>4</sub>, Chloroform-*d*, 99.8 atom % D were purchased from Energy Chemical, all other reagents were of analytical grade and used as received. Ultrapure water was prepared using a Milli-Q water purification system.

## Apparatus

Fluorescence spectra were recorded on a Hitachi High-Technologies Corporation Tokyo Japan 5J2-0004 model F-7000 FL spectrofluorometer. The NMR spectra were recorded using a AVANCEDRX600 NMR spectrometer (Bruker, Germany) operated at 600 MHz. Electrospray ionization mass spectra were obtained with a High Performance 1100 Liquid Chromatography-Mass Spectrometer (Agilent Technologies, USA). UV-Vis absorption was characterized using a UV/Vis/NIR spectrophotometer (Shimadzu, Japan). The Fourier transform infrared (FT-IR) spectra were obtained on a FT-IR spectrophotometer (Thermo Nicolet 365). Single crystal fluorescence pictures were obtained with a Fluorescent Inverted microscope (OLYMPUS U-HGLGPS). X-ray powder diffraction patterns were taken using a D/max-TTR III X-ray diffractometer (Rigaku, Japan) with a scan speed of 0.1 s per step and a step size of 0.01°. Fluorescence emission lifetimes were determined on an Edinburgh Analytical Instrument (FLS900 fluorescence spectrometer) with a light-emitting diode lamp and analyzed by the use of a program for exponential fits. Fluorescence quantum yields measurements were performed on an integrating sphere, with a 280 nm Edinburgh Instruments Ltd. light emitting diode as the excitation source (instrument model no. FLS920). The crystallographic data collection was performed without any inert gas protection at room temperature on a Bruker SMART APEX-II CCD area detector using graphite-monochromated Mo-K $\alpha$  radiation ( $\lambda = 0.71073 \text{ \AA}$ ). The data reduction and integration and global unit cell refinements were performed using the INTEGRATE program of the APEX2 software package. Semiempirical absorption corrections were applied using the SCALE program for the area detector. The structures were solved by direct methods and refined using the full-matrix leastsquares methods on F2 using SHELX. CCDC 1833475, 1833476, 1833477, 1833478, 1833479, 1833480, 1833481, 1833482, 1833483 and 1833484 contain the supplementary crystallographic data for TPE-2by-1-E, TPE-2by-1-Z, TPE-2by-2-E, TPE-2by-2-Z, TPE-2by-3-E, TPE-2by-3-Z, TPE-2TZ-E, TPE-2TZ-Z, TPE-2EZ-E and TPE-2EZ-Z.

## Synthesis.

**Synthesis of TPE-2OH.** The synthesis of TPE-2OH was synthesized as the previous report. Zinc powder (1.0 g, 15.3 mmol) was added into a 100 mL double-neck flask. Under an N<sub>2</sub> atmosphere, 25 mL anhydrous THF was added, which was cooled to -5 °C, and then TiCl<sub>4</sub> (1.1 mL, 10 mmol) and pyridine (0.05 mL, 0.6 mmol) were added dropwise. The mixture was refluxed at 75 °C for 2 hours and 20 mL THF solution of 4-Hydroxybenzophenone (1.05 g, 5 mmol) was added. The solution was further refluxed at 75 °C for 12 hours. Upon completion of the reaction, the solution

was cooled to room temperature and poured into 40 mL 30% water solution of  $K_2CO_3$ , which was stirred strongly for 5 minutes and then filtered. The filtrate was extracted with ethyl acetate, washed with water successively, brine, and dried with  $Na_2SO_4$ . The crude products were obtained by rotary evaporation, and purified by column chromatography (silica gel, petroleum ether/ ethyl acetate=20:1) to result in a light green product TPE-2OH (Yield, 85%). The  $^1H$  NMR and  $^{13}C$  NMR spectrum of TPE-2OH (400 MHz,  $CD_3OH$ , 25 °C),  $\delta$  (TMS, ppm) are showed as in Fig. S1 and S2, respectively. High resolution mass spectrometry of TPE-2OH is showed in Fig. S3, (m/z): calculated for  $C_{26}H_{20}O_2$   $[M+Na]^+$  387.1356, found 387.1356(high resolution).  $^1H$  NMR (400 MHz,  $CD_3OH$ , 25 °C) 7.11-6.96(10 H, m), 6.82 -6.77(4 H, m), 6.76-6.47(4 H, m).  $^{13}C$  NMR (400 MHz,  $CD_3OH$ , 25 °C) 157.09, 146.05, 145.94, 141.18, 136.89, 136.76, 133.79, 133.74, 132.64, 132.60, 128.69, 127.27, 115.62, 115.5.

**Synthesis of TPE-2by-1.** A solution of TPE-2OH (364 mg, 1 mmol), 2-(Bromomethyl) pyridine hydrobromide (750 mg, 2.5 mmol) and potassium tert-butanolate (840 mg, 7.5 mmol) in methylbenzene (15 mL) was refluxed at 105 °C for 12 h. The solvent was removed in rotary evaporation, and the residue was dissolved in DCM and water. The organic layer was washed with brine and dried over  $Na_2SO_4$ . The crude products were obtained by rotary evaporation, and purified by column chromatography (silica gel, petroleum ether/ ethyl acetate=3:1) to result in two white solids (TPE-2by-1-E and TPE-2by-1-Z) (Yield, 40 %; 42 %). The  $^1H$  NMR and  $^{13}C$  NMR spectrum of TPE-2by-1-E (600 MHz,  $CDCl_3$ , 25 °C)  $\delta$  (TMS, ppm) are showed as in Fig. S4 and S5, High resolution mass spectrometry of TPE-2by-1-E is showed in Fig. S6, (m/z): calculated for  $C_{38}H_{30}N_2O_2$   $[M+H]^+$  547.2381, found 547.2385(high resolution). Crystal structure of TPE-2by-1-E is showed in Fig. S44 A.  $^1H$  NMR (600 MHz,  $CDCl_3$ , 25 °C) 8.57(1 H, d, J=6 Hz), 7.70(1 H, t, J=18 Hz), 7.49(1 H, d, J=6 Hz), 7.22(1 H, t, J=12 Hz), 7.10(3 H, m, J=12 Hz), 7.04(2 H, m, J=6 Hz), 6.93(2 H, d, J=12 Hz), 6.72(2 H, d, J=6 Hz), 5.11(2 H, s).  $^{13}C$  NMR (600 MHz,  $CDCl_3$ , 25 °C) 157.30, 156.87, 149.16, 144.11, 139.77, 136.83, 136.71, 132.57, 131.34, 127.67, 126.23, 122.53, 121.28, 113.96, 70.55. The  $^1H$  NMR and  $^{13}C$  NMR spectrum of TPE-2by-1-Z (600 MHz,  $CDCl_3$ , 25 °C)  $\delta$  (TMS, ppm) are showed as in Fig. S6 and S7, High resolution mass spectrometry of TPE-2by-1-Z is showed in Fig. S8, (m/z): calculated for  $C_{38}H_{30}N_2O_2$   $[M+H]^+$  547.2381, found 547.2382(high resolution). Crystal structure of TPE-2by-1-Z is showed in Fig. S44 B.  $^1H$  NMR (600 MHz,  $CDCl_3$ , 25 °C) 8.57(1 H, d, J=6 Hz), 7.71(1 H, t, J=18 Hz), 7.51(1 H, d, J=12 Hz), 7.21(1 H, t, J=12 Hz), 7.08(3 H, m, J=12 Hz), 7.06(2 H, m, J=6 Hz), 6.94(2 H, d, J=6 Hz), 6.74(2 H, d, J=12 Hz), 5.13(2 H, s).  $^{13}C$  NMR (600 MHz,  $CDCl_3$ , 25 °C) 157.31, 156.88, 149.16, 144.04, 139.78, 136.88, 136.74, 132.55, 131.36, 127.57, 126.22, 122.56, 121.31, 114.05, 70.55.

**Synthesis of TPE-2by-2.** The method of synthesizing TPE-2by-2 is the same as that of TPE-2by-1. (TPE-2by-2-E and TPE-2by-2-Z) (Yield, 38%; 40 %). The  $^1H$  NMR and  $^{13}C$  NMR spectrum of TPE-2by-2-E (600 MHz,  $CDCl_3$ , 25 °C)  $\delta$  (TMS, ppm) are showed as in Fig. S10 and S11, High resolution mass spectrometry of TPE-2by-2-E is showed in Fig. S12, (m/z): calculated for  $C_{38}H_{30}N_2O_2$   $[M+H]^+$  547.2381, found 547.2381(high resolution). Crystal structure of TPE-2by-2-E is showed in Fig. S44 C.  $^1H$  NMR (600 MHz,  $CDCl_3$ , 25 °C) 8.64(1 H, d), 8.57 (1 H, dd, J=6 Hz), 7.74(1 H, d, J=12 Hz), 7.32(1 H, m, J=6 Hz), 7.13(3 H, m, J=18 Hz), 7.05(2 H, m, J=6 Hz), 6.94(2 H, d, J=12 Hz), 6.71(2 H, d, J=12 Hz), 4.99(2 H, s).  $^{13}C$  NMR (600 MHz,  $CDCl_3$ , 25 °C) 157.01, 149.57, 149.20, 144.22, 139.95, 137.19, 135.40, 132.78, 132.68, 131.50, 127.88, 126.46, 123.58,

114.11, 67.61. The  $^1\text{H}$  NMR and  $^{13}\text{C}$  NMR spectrum of TPE-2by-2-Z (600 MHz,  $\text{CDCl}_3$ , 25 °C)  $\delta$  (TMS, ppm) are shown as in Fig. S13 and S14, High resolution mass spectrometry of TPE-2by-2-Z is shown in Fig. S15, (m/z): calculated for  $\text{C}_{38}\text{H}_{30}\text{N}_2\text{O}_2$   $[\text{M}+\text{H}]^+$  547.2381, found 547.2385 (high resolution). Crystal structure of TPE-2by-2-Z is shown in Fig. S44 D.  $^1\text{H}$  NMR (600 MHz,  $\text{CDCl}_3$ , 25 °C) 8.64(1 H, d), 8.57 (1 H, dd, J=6 Hz), 7.74(1 H, d, J=12 Hz), 7.31(1 H, m, J=12 Hz), 7.10(3 H, m, J=18 Hz), 7.05(2 H, m, J=12 Hz), 6.96(2 H, d, J=12 Hz), 6.71(2 H, d, J=12 Hz), 4.99(2 H, s).  $^{13}\text{C}$  NMR (600 MHz,  $\text{CDCl}_3$ , 25 °C) 156.96, 149.40, 149.03, 144.09, 139.74, 137.01, 135.28, 132.68, 132.54, 131.33, 127.71, 126.20, 123.45, 113.98, 67.46.

**Synthesis of TPE-2by-3.** The method of synthesizing TPE-2by-3 is the same as that of TPE-2by-1. (TPE-2by-3-E and TPE-2by-3-Z) (Yield, 36%; 40 %). The  $^1\text{H}$  NMR and  $^{13}\text{C}$  NMR spectrum of TPE-2by-3-E (600 MHz,  $\text{CDCl}_3$ , 25 °C)  $\delta$  (TMS, ppm) are shown as in Fig. S16 and S17. High resolution mass spectrometry of TPE-2by-3-E is shown in Fig. S18, (m/z): calculated for  $\text{C}_{38}\text{H}_{30}\text{N}_2\text{O}_2$   $[\text{M}+\text{H}]^+$  547.2381, found 547.2383 (high resolution). Crystal structure of TPE-2by-4-E is shown in Fig. 1 A.  $^1\text{H}$  NMR (600 MHz,  $\text{CDCl}_3$ , 25 °C) 8.51(2 H, dd, J=6 Hz), 7.23 (2 H, d, J=6 Hz), 7.03(3 H, m, J=18 Hz), 6.96(2 H, m, J=12 Hz), 6.85(2 H, d, J=6 Hz), 6.61(2 H, d, J=6 Hz), 4.93(2 H, s).  $^{13}\text{C}$  NMR (600 MHz,  $\text{CDCl}_3$ , 25 °C) 156.96, 149.40, 149.03, 144.09, 139.74, 137.01, 135.28, 132.68, 132.54, 131.33, 127.71, 126.20, 123.45, 113.98, 67.46. The  $^1\text{H}$  NMR and  $^{13}\text{C}$  NMR spectrum of TPE-2by-3-Z (600 MHz,  $\text{CDCl}_3$ , 25 °C)  $\delta$  (TMS, ppm) are shown as in Fig. S19 and S20. High resolution mass spectrometry of TPE-2by-3-Z is shown in Fig. S21, (m/z): calculated for  $\text{C}_{38}\text{H}_{30}\text{N}_2\text{O}_2$   $[\text{M}+\text{H}]^+$  547.2381, found 547.2378 (high resolution). Crystal structure of TPE-2by-3-Z is shown in Fig. 1 B.  $^1\text{H}$  NMR (600 MHz,  $\text{CDCl}_3$ , 25 °C) 8.51(2 H, dd, J=6 Hz), 7.23 (2 H, d, J=6 Hz), 6.99(3 H, m, J=18 Hz), 6.91(2 H, m, J=12 Hz), 6.85(2 H, d, J=6 Hz), 6.61(2 H, d, J=12 Hz), 4.92(2 H, s).  $^{13}\text{C}$  NMR (600 MHz,  $\text{CDCl}_3$ , 25 °C) 156.66, 146.18, 143.91, 139.80, 137.19, 133.64, 131.34, 127.63, 126.35, 121.53, 114.04, 68.08.

**Synthesis of TPE-2TZ.** The method of synthesizing TPE-2TZ is the same as that of TPE-2by-1. (TPE-2TZ -E and TPE-2TZ -Z) (Yield, 40%; 42 %). The  $^1\text{H}$  NMR and  $^{13}\text{C}$  NMR spectrum of TPE-2TZ -E (600 MHz,  $\text{CDCl}_3$ , 25 °C)  $\delta$  (TMS, ppm) are shown as in Fig. S22 and S23. High resolution mass spectrometry of TPE-2TZ -E is shown in Fig. S24, (m/z): calculated for  $\text{C}_{36}\text{H}_{30}\text{N}_2\text{O}_2\text{S}_2$   $[\text{M}+\text{H}]^+$  587.1821, found 587.1820 (high resolution). Crystal structure of TPE-2by-4-E is shown in Fig. S44 E.  $^1\text{H}$  NMR (600 MHz,  $\text{CDCl}_3$ , 25 °C) 7.11(1 H, s), 7.09 (3 H, m, J=6 Hz), 7.04 (2 H, m, J=6 Hz), 6.91(2 H, d, J=12 Hz), 6.70(2 H, d, J=6 Hz), 5.05(2 H, s), 2.72(3 H, s).  $^{13}\text{C}$  NMR (600 MHz,  $\text{CDCl}_3$ , 25 °C) 166.59, 157.07, 152.10, 144.28, 139.92, 136.96, 132.66, 131.51, 127.82, 126.37, 115.90, 114.06, 66.17, 19.28. The  $^1\text{H}$  NMR and  $^{13}\text{C}$  NMR spectrum of TPE-2TZ-Z (600 MHz,  $\text{CDCl}_3$ , 25 °C)  $\delta$  (TMS, ppm) are shown as in Fig. S25 and S26, High resolution mass spectrometry of TPE-2by-3-Z is shown in Fig. S27, (m/z): calculated for  $\text{C}_{36}\text{H}_{30}\text{N}_2\text{O}_2\text{S}_2$   $[\text{M}+\text{H}]^+$  587.1821, found 587.1822 (high resolution). Crystal structure of TPE-2by-3-Z is shown in Fig. S44 F.  $^1\text{H}$  NMR (600 MHz,  $\text{CDCl}_3$ , 25 °C) 7.11(1 H, s), 7.09 (3 H, m, J=12 Hz), 7.04 (2 H, m, J=6 Hz), 6.92(2 H, d, J=12 Hz), 6.70(2 H, d, J=6 Hz), 5.05(2 H, s), 2.71(3 H, s).  $^{13}\text{C}$  NMR (600 MHz,  $\text{CDCl}_3$ , 25 °C) 166.45, 156.94, 151.96, 144.14, 139.78, 136.82, 132.53, 131.37, 127.68, 126.23, 115.77, 113.92, 66.04, 19.16.

**Synthesis of TPE-2EZ.** The method of synthesizing TPE-2EZ is the same as that of TPE-2by-1.

(TPE-2EZ -E and TPE-2EZ -Z) (Yield, 43%; 44 %). The  $^1\text{H}$  NMR and  $^{13}\text{C}$  NMR spectrum of TPE-2EZ -E (600 MHz,  $\text{CDCl}_3$ , 25 °C)  $\delta$  (TMS, ppm) are showed as in Fig. S28 and S29. High resolution mass spectrometry of TPE-2EZ -E is showed in Fig. S30, (m/z): calculated for  $\text{C}_{38} \text{H}_{35} \text{N}_2 \text{O}_4$   $[\text{M}+\text{H}]^+$  583.2591, found 583.2591 (high resolution). Crystal structure of TPE-2EZ -E is showed in Fig. S44 G.  $^1\text{H}$  NMR (600 MHz,  $\text{CDCl}_3$ , 25 °C) 7.13 (3 H, m, J=18 Hz), 7.05 (2 H, d, J=12 Hz), 6.93(2 H, d, J=6 Hz), 6.66(2 H, d, J=6 Hz), 4.71(2 H, s), 2.36(3 H, s), 2.26(3 H, s).  $^{13}\text{C}$  NMR (600 MHz,  $\text{CDCl}_3$ , 25 °C) 167.42, 159.72, 156.76, 144.08, 139.76, 137.13, 132.60, 131.35, 127.76, 126.35, 114.15, 110.28, 59.47, 11.14, 10.15. The  $^1\text{H}$  NMR and  $^{13}\text{C}$  NMR spectrum of TPE-2TZ-Z (600 MHz,  $\text{CDCl}_3$ , 25 °C)  $\delta$  (TMS, ppm) are showed as in Fig. S31 and S32, High resolution mass spectrometry of TPE-2EZ -Z is showed in Fig. S33, (m/z): calculated for  $\text{C}_{38} \text{H}_{35} \text{N}_2 \text{O}_4$   $[\text{M}+\text{H}]^+$  583.2591, found 583.2590 (high resolution). Crystal structure of TPE-2TZ-Z is showed in Fig. S44 H.  $^1\text{H}$  NMR (600 MHz,  $\text{CDCl}_3$ , 25 °C) 7.08 (3 H, m, J=6 Hz), 7.02 (2 H, d, J=12 Hz), 6.96(2 H, d, J=6 Hz), 6.69(2 H, d, J=12 Hz), 4.75(2 H, s), 2.37(3 H, s), 2.27(3 H, s).  $^{13}\text{C}$  NMR (600 MHz,  $\text{CDCl}_3$ , 25 °C) 167.44, 159.73, 156.72, 143.94, 139.81, 137.25, 132.60, 131.34, 127.64, 126.35, 114.35, 110.29, 59.54, 11.16, 10.18.

**Synthesis of TPE-2B.** The method of synthesizing TPE-2B is the same as that of TPE-2by-1. (TPE-2B is a mixture of cis and trans isomers) (Yield, 92 %). The  $^1\text{H}$  NMR and  $^{13}\text{C}$  NMR spectrum of TPE-2B (600 MHz,  $\text{CDCl}_3$ , 25 °C)  $\delta$  (TMS, ppm) are showed as in Fig. S34 and S35. High resolution mass spectrometry of TPE-2B is showed in Fig. S36, (m/z): calculated for  $\text{C}_{40} \text{H}_{33} \text{O}_2$   $[\text{M}+\text{H}]^+$  545.2475, found 545.2467 (high resolution).  $^1\text{H}$  NMR (600 MHz,  $\text{CDCl}_3$ , 25 °C) 7.31 (5 H, m, J=30 Hz), 7.22 (5 H, m, J=18 Hz), 7.02(2 H, m, J=24 Hz), 6.86(2 H, m, J=24 Hz), 4.90(1 H, s), 4.87(1 H, s).  $^{13}\text{C}$  NMR (600 MHz,  $\text{CDCl}_3$ , 25 °C) 157.25, 144.17, 139.71, 136.94, 136.69, 132.56, 131.42, 128.55, 127.96, 127.57, 126.21, 114.02, 113.91, 69.90.

**Synthesis of TPE-2T.** The method of synthesizing TPE-2T is the same as that of TPE-2by-1. (TPE-2T is a mixture of cis and trans isomers) (Yield, 95 %). The  $^1\text{H}$  NMR and  $^{13}\text{C}$  NMR spectrum of TPE-2B (600 MHz,  $\text{CDCl}_3$ , 25 °C)  $\delta$  (TMS, ppm) are showed as in Fig. S37 and S38. High resolution mass spectrometry of TPE-2T is showed in Fig. S39, (m/z): calculated for  $\text{C}_{36} \text{H}_{29} \text{O}_2 \text{S}_2$   $[\text{M}+\text{H}]^+$  557.1603, found 557.1603 (high resolution).  $^1\text{H}$  NMR (600 MHz,  $\text{CDCl}_3$ , 25 °C) 7.32 (2 H, m, J=24 Hz), 7.10 (6 H, m, J=18 Hz), 6.96(2 H, m, J=30 Hz), 6.72(2 H, m, J=24 Hz), 5.00(1 H, s), 4.96(1 H, s).  $^{13}\text{C}$  NMR (600 MHz,  $\text{CDCl}_3$ , 25 °C) 157.11, 144.14, 139.75, 137.94, 136.77, 132.57, 131.43, 127.60, 127.13, 126.24, 123.17, 114.00, 113.91, 65.43.

**Synthesis of TPE-2N.** The method of synthesizing TPE-2N is the same as that of TPE-2by-1. (TPE-2N is a mixture of cis and trans isomers) (Yield, 97 %). The  $^1\text{H}$  NMR and  $^{13}\text{C}$  NMR spectrum of TPE-2N (600 MHz,  $\text{CDCl}_3$ , 25 °C)  $\delta$  (TMS, ppm) are showed as in Fig. S40 and S41. High resolution mass spectrometry of TPE-2N is showed in Fig. S41, (m/z): calculated for  $\text{C}_{48} \text{H}_{36} \text{O}_2 \text{C}_{48}$   $[\text{M}+\text{Na}]^+$  667.2608, found 667.2608 (high resolution).  $^1\text{H}$  NMR (600 MHz,  $\text{CDCl}_3$ , 25 °C) 7.76 (4 H, m, J=24 Hz), 7.40 (4 H, m, J=24 Hz), 6.95(4 H, m, J=24 Hz), 6.86(2 H, m, J=24 Hz), 6.66(2 H, m, J=18 Hz) 5.05(2 H, s).  $^{13}\text{C}$  NMR (600 MHz,  $\text{CDCl}_3$ , 25 °C) 157.27, 144.17, 139.74, 136.71, 134.51, 132.97, 132.97, 132.60, 131.44, 128.34, 127.96, 127.75, 127.59, 126.44, 126.24, 126.08, 125.43, 114.14, 70.01.

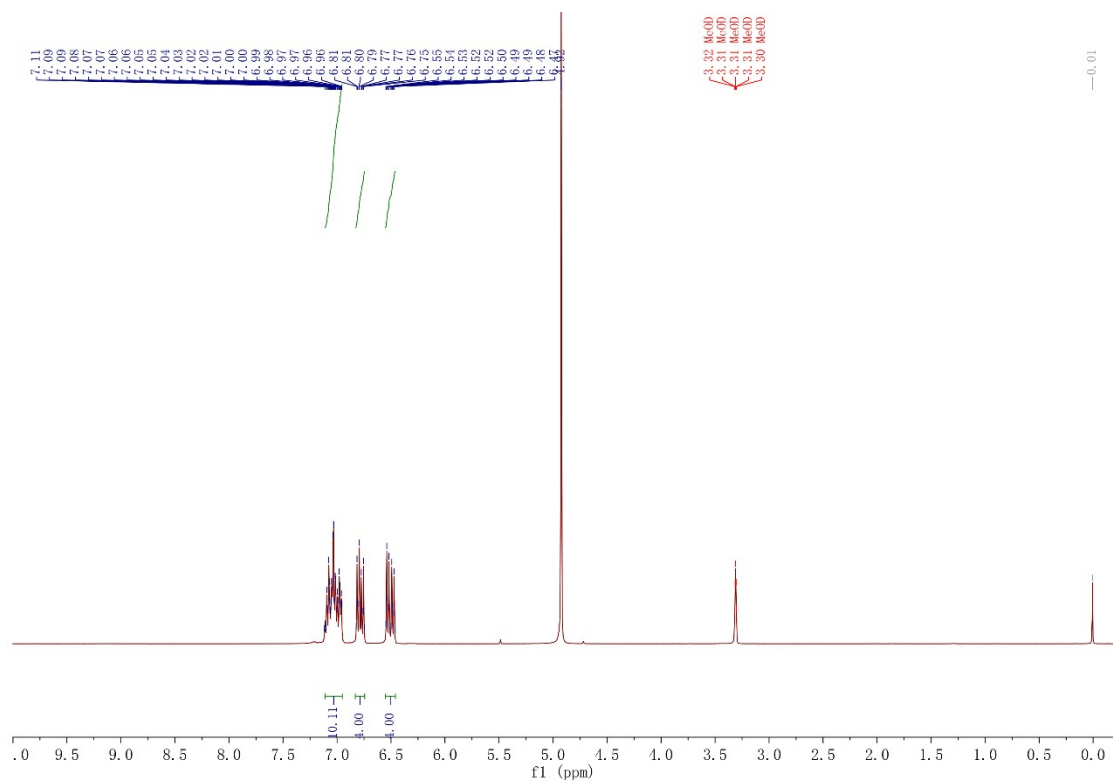

Fig. S1  $^1\text{H}$  NMR spectrum of compound TPE-2OH in  $\text{CD}_3\text{OH}$ .

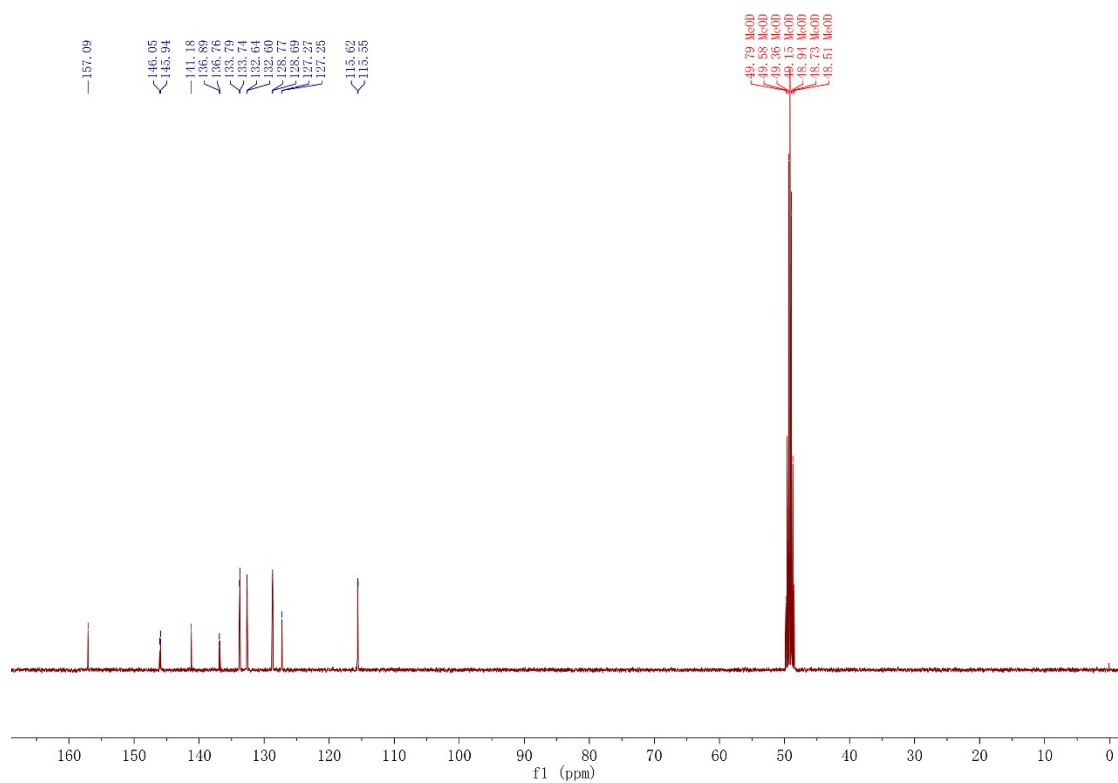

Fig. S2  $^{13}\text{C}$  NMR spectrum of compound TPE-2OH in  $\text{CD}_3\text{OH}$ .

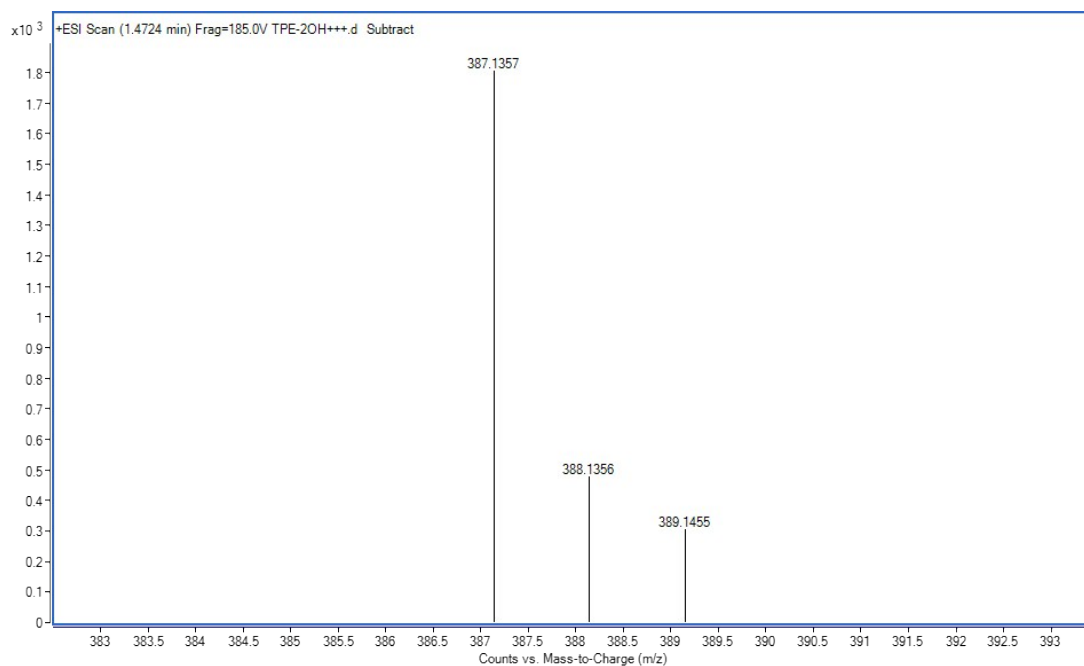

**Fig. S3** High-resolution mass spectrum of TPE-2OH.

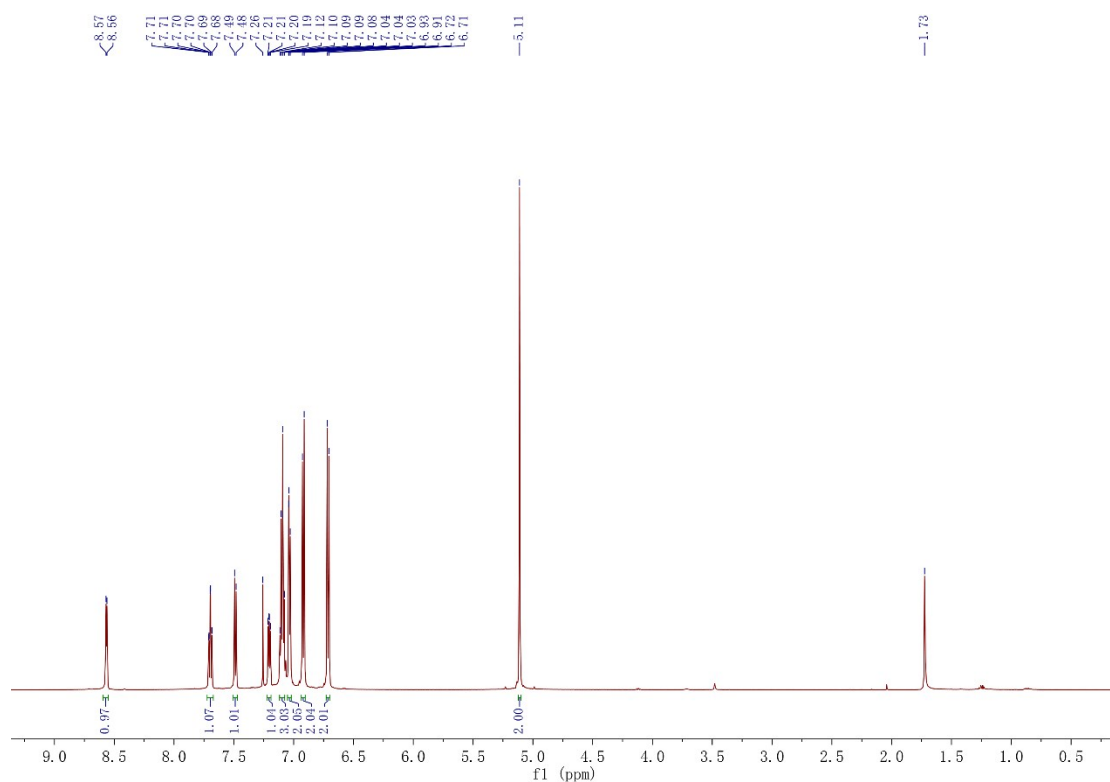

**Fig. S4** <sup>1</sup>H NMR spectrum of compound TPE-2by-1-E in CDCl<sub>3</sub>.



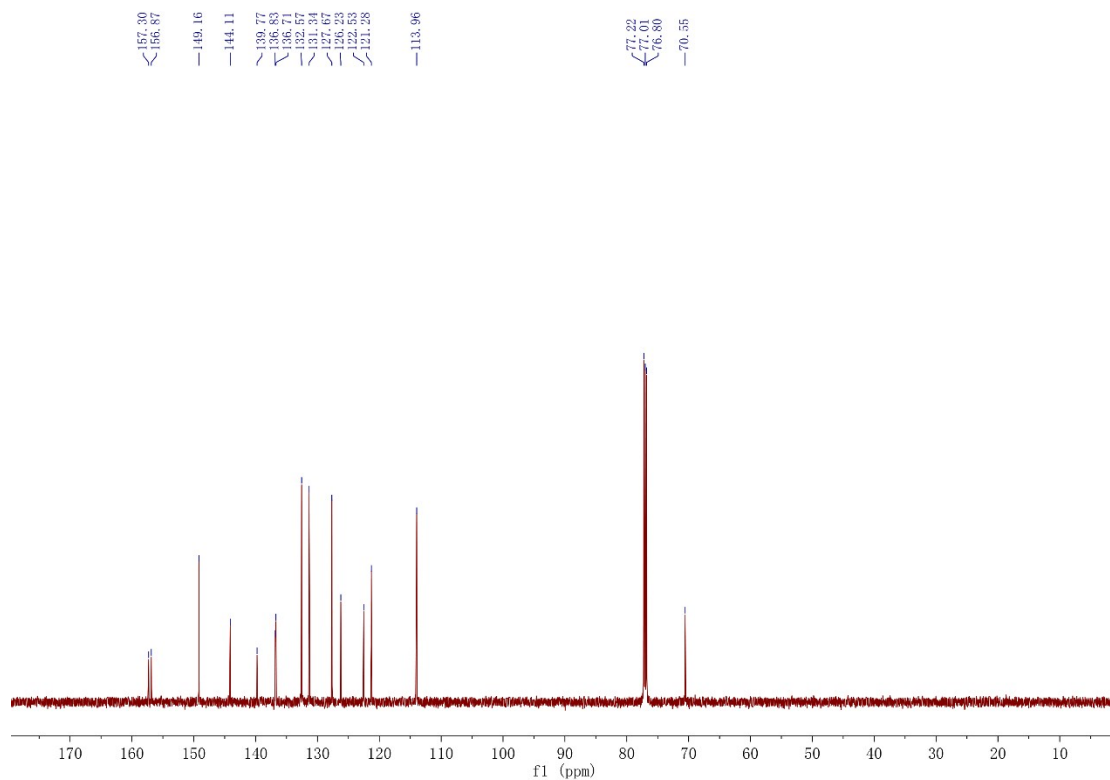

Fig. S5  $^{13}\text{C}$  NMR spectrum of compound TPE-2by-1-E in  $\text{CDCl}_3$ .

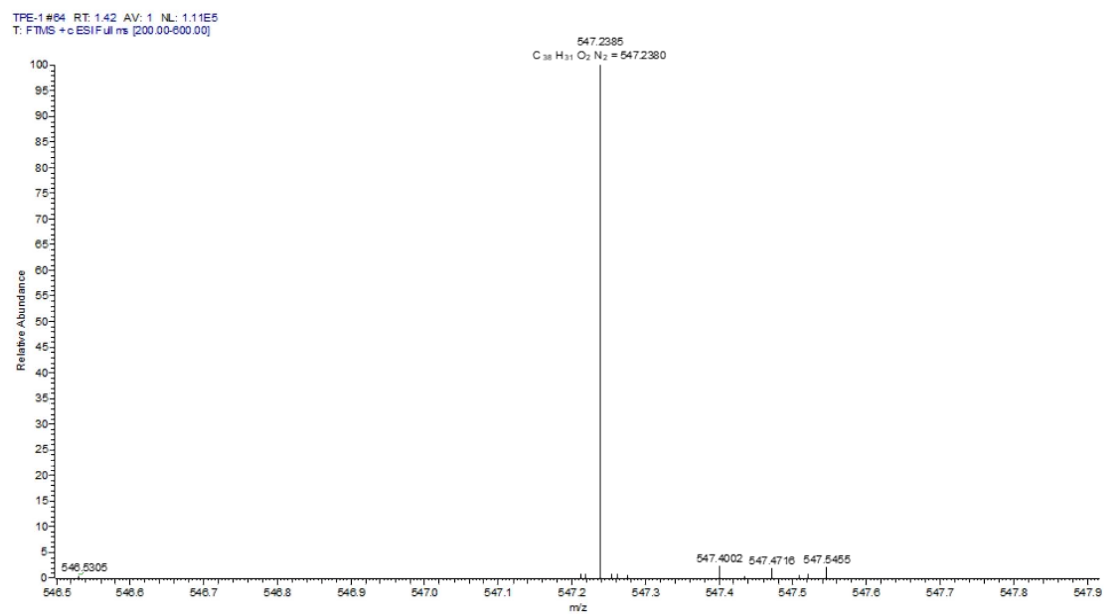

Fig. S6 High-resolution mass spectrum of compound TPE-2by-1-E.

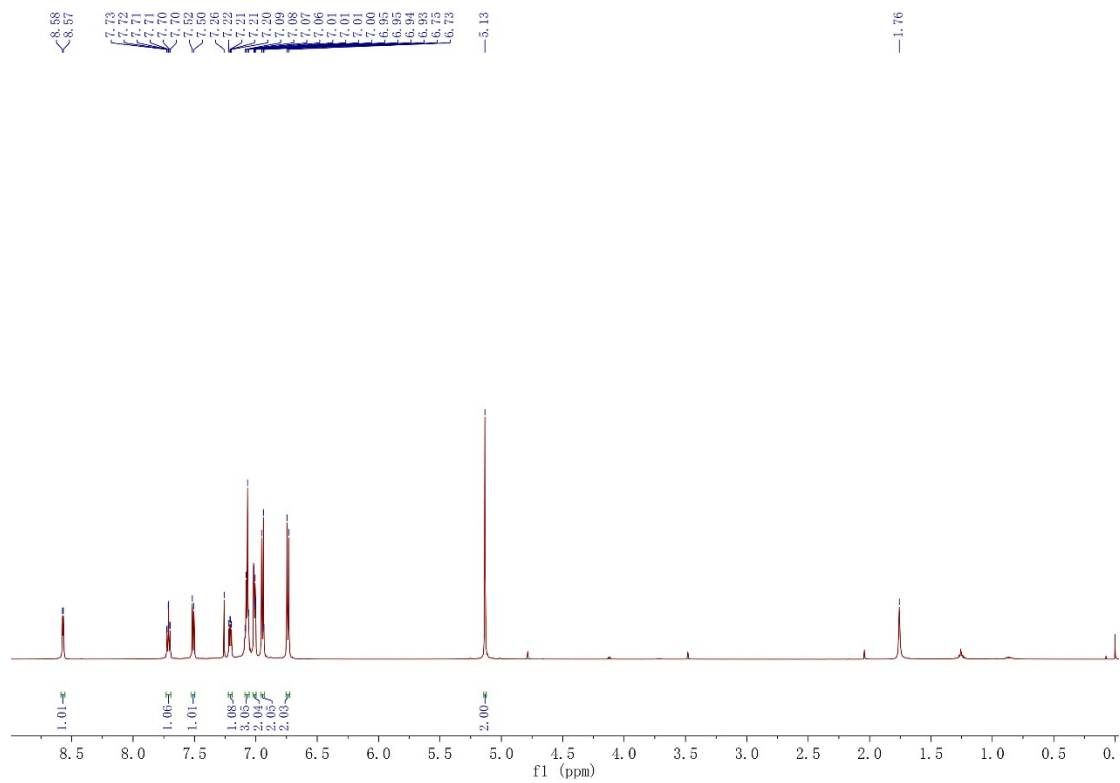

Fig. S7  $^1\text{H}$  NMR spectrum of compound TPE-2by-1-Z in  $\text{CDCl}_3$ .

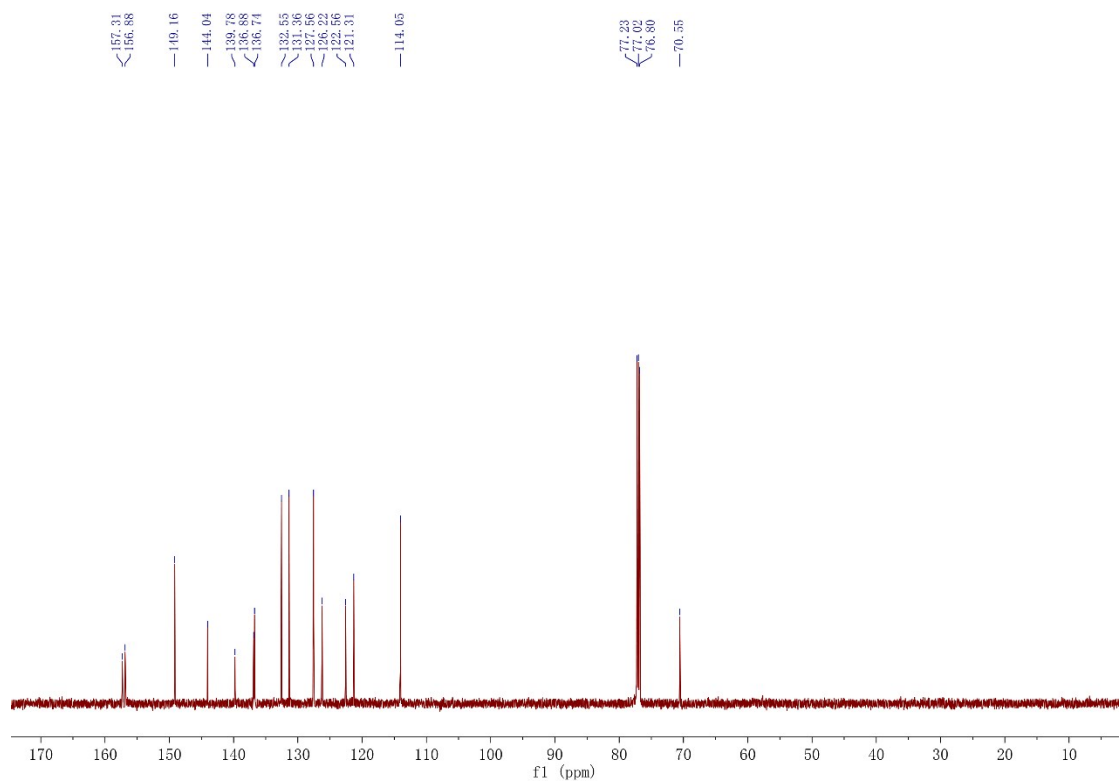

Fig. S8  $^{13}\text{C}$  NMR spectrum of compound TPE-2by-1-Z in  $\text{CDCl}_3$ .

lpe-2#81 RT: 1.71 AV: 1 NL: 1.58E7  
T: FTMS + c ESI Full ms [200.00-600.00]

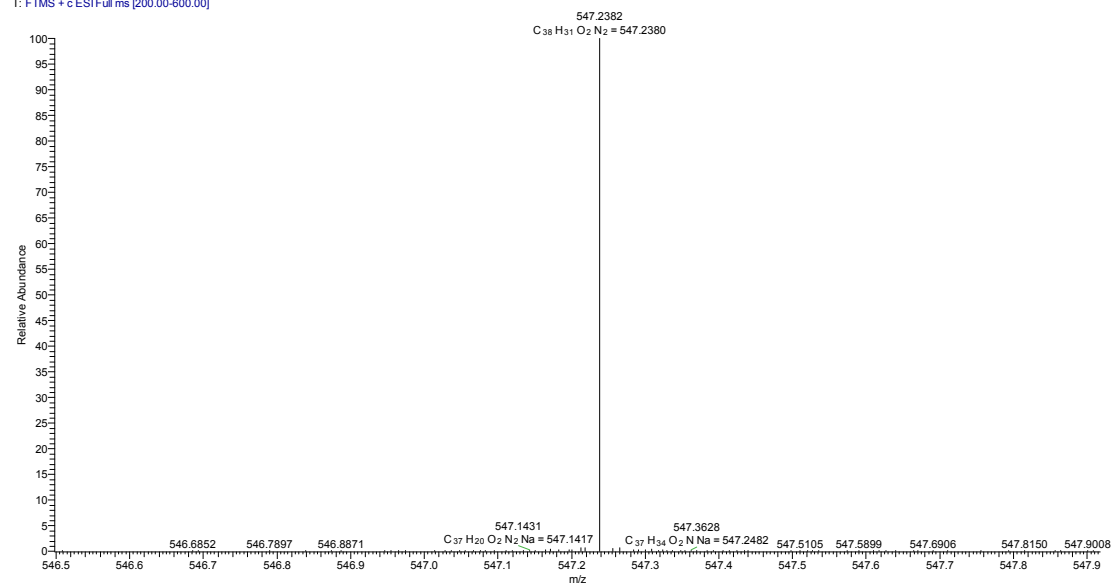

**Fig. S9** High-resolution mass spectrum of compound TPE-2by-1-Z.

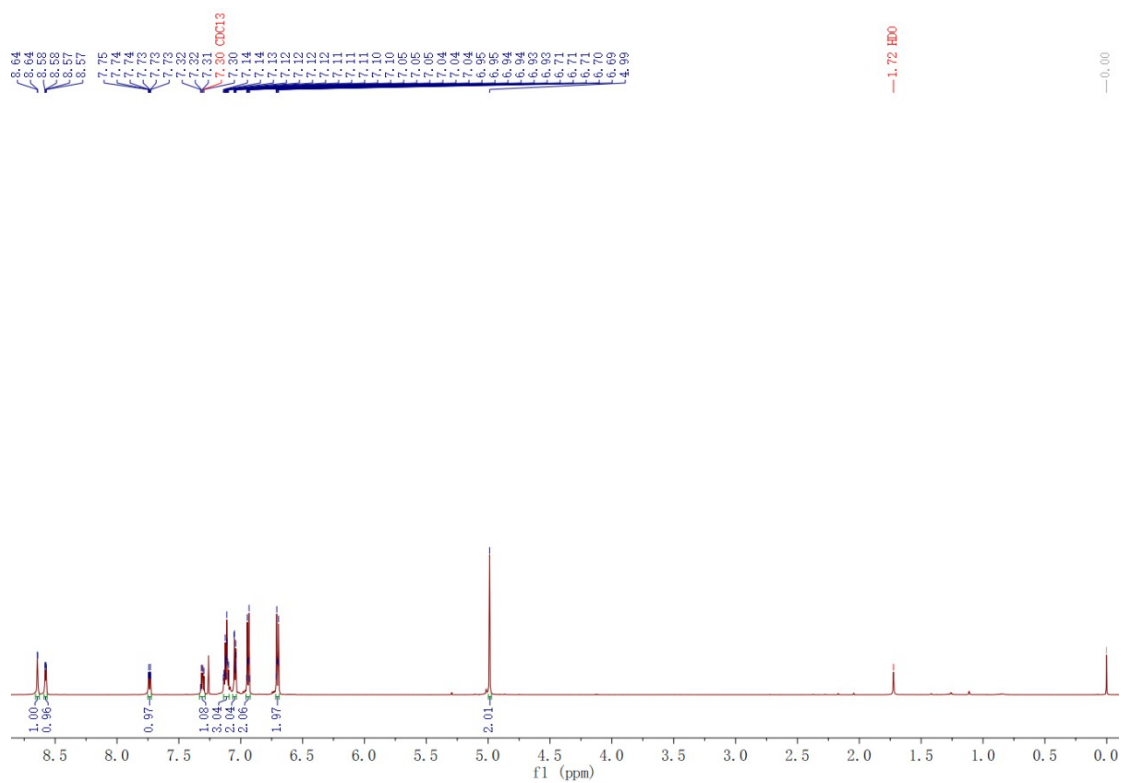

**Fig. S10** <sup>1</sup>H NMR spectrum of compound TPE-2by-2-E in CDCl<sub>3</sub>.

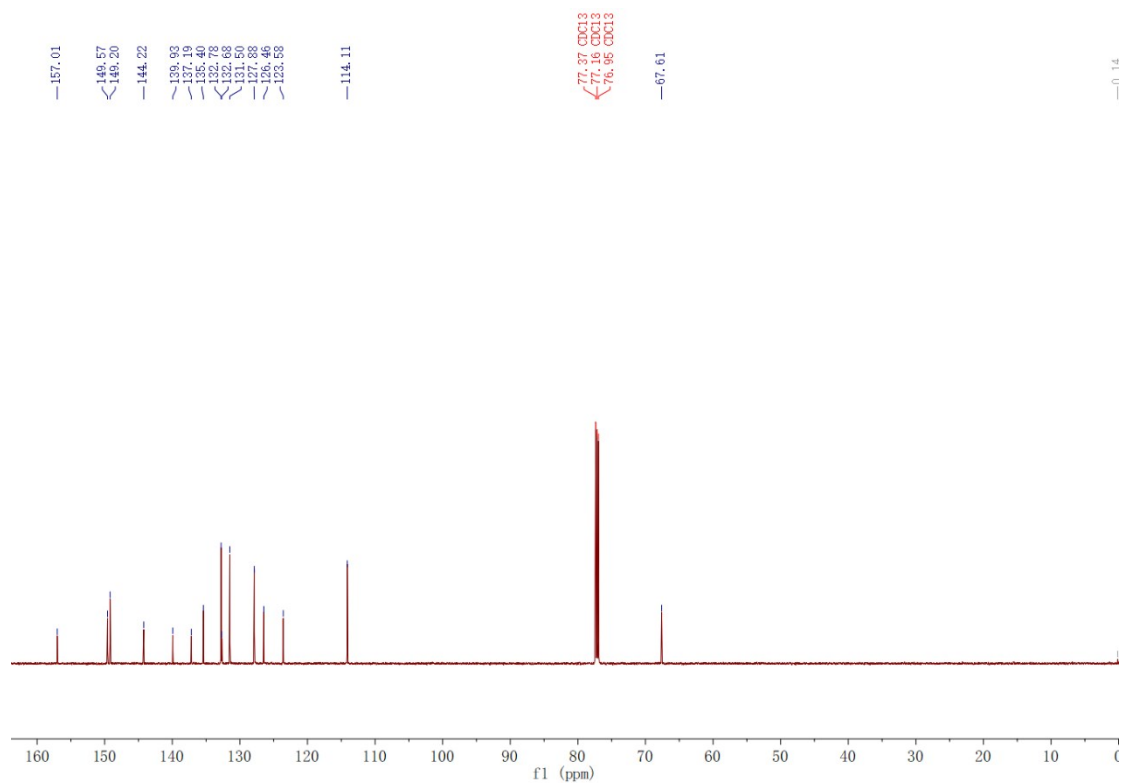

**Fig. S11**  $^{13}\text{C}$  NMR spectrum of compound TPE-2by-2-E in  $\text{CDCl}_3$ .

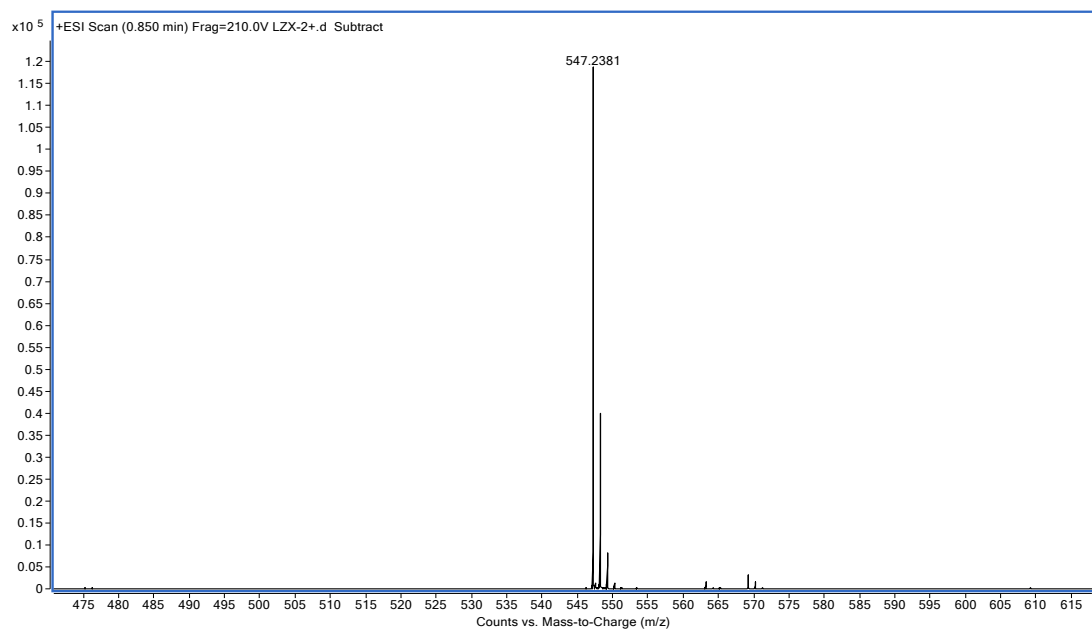

**Fig. S12** High-resolution mass spectrum of compound TPE-2by-2-E.

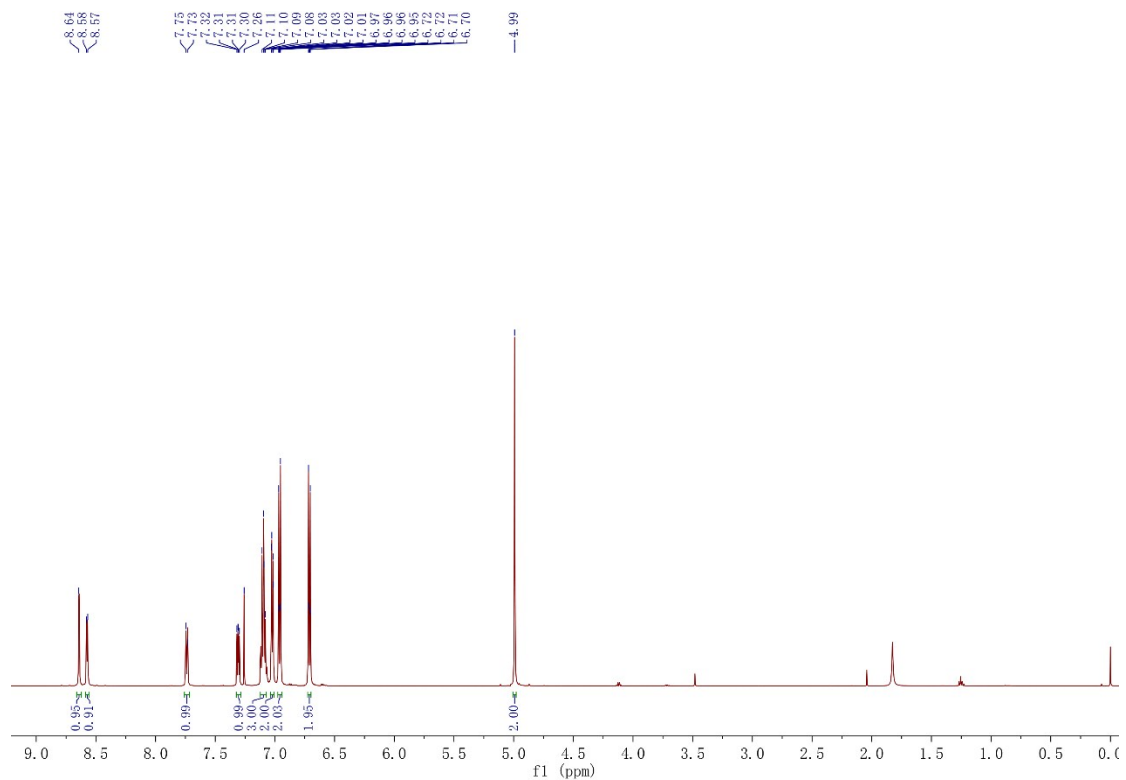

**Fig. S13**  $^1\text{H}$  NMR spectrum of compound TPE-2by-2-Z in  $\text{CDCl}_3$ .

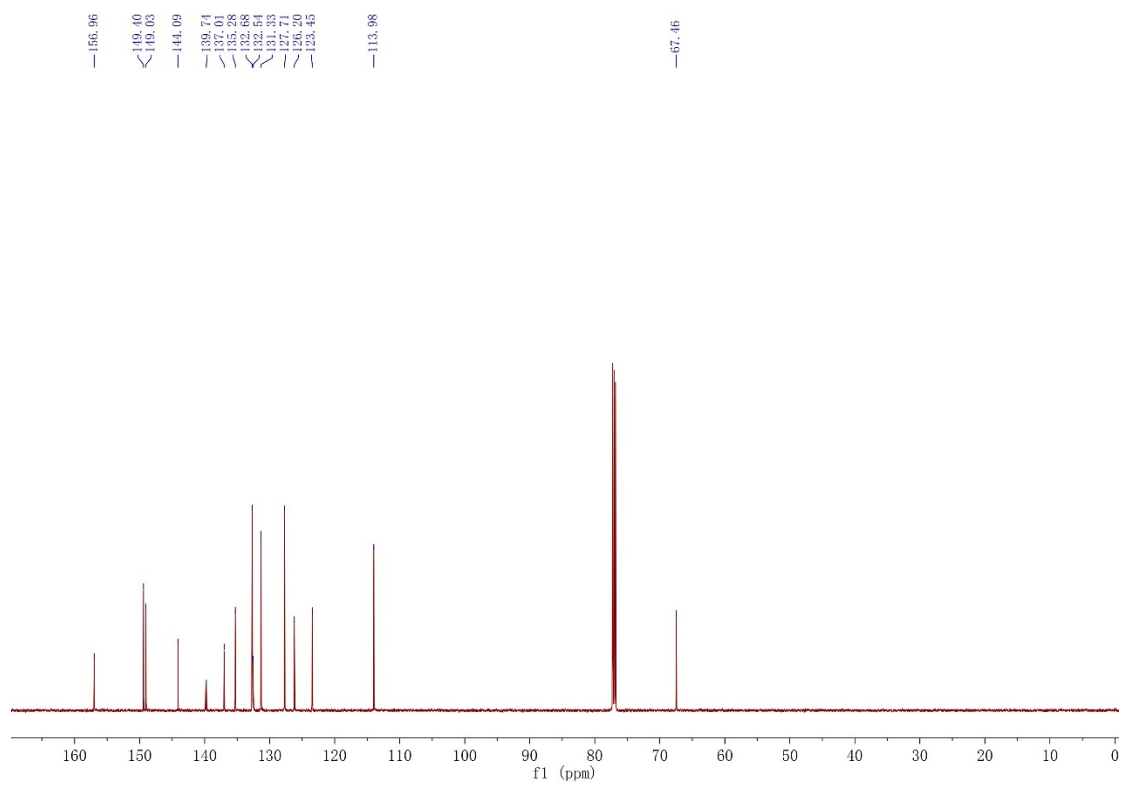

**Fig. S14**  $^{13}\text{C}$  NMR spectrum of compound TPE-2by-2-Z in  $\text{CDCl}_3$ .

tpe-by #69 RT: 1.52 AV: 1 NL: 9.27E6  
T: FTMS + c ESI Full ms [150.00-750.00]

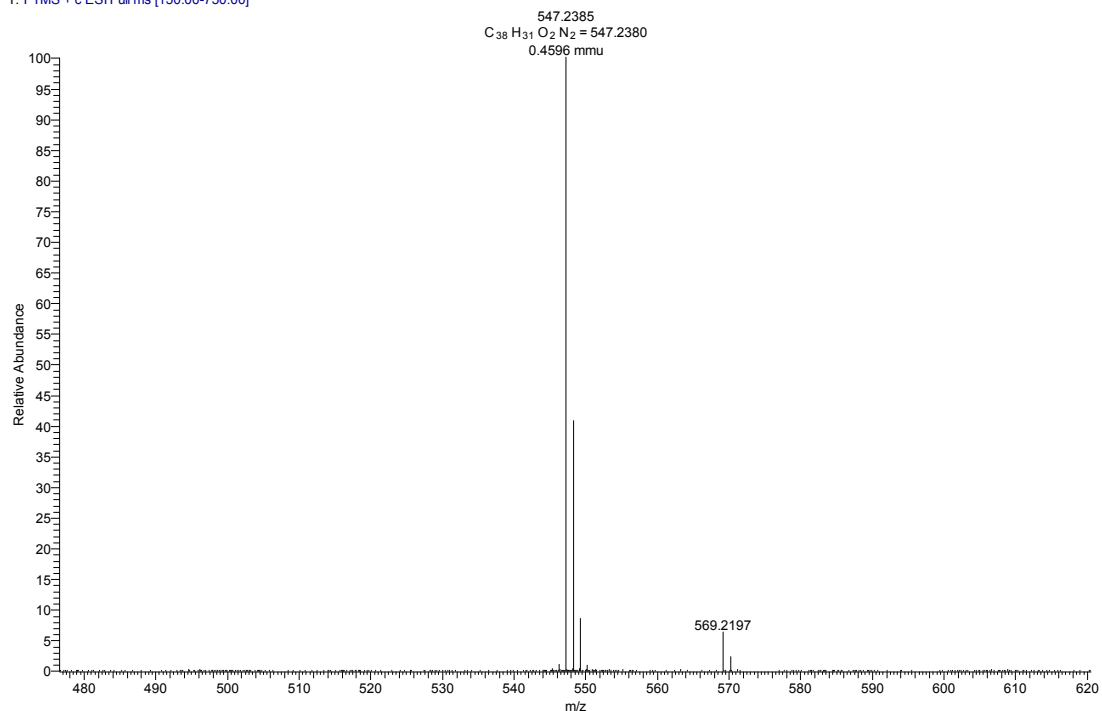

Fig. S15 High-resolution mass spectrum of compound TPE-2by-2-Z.

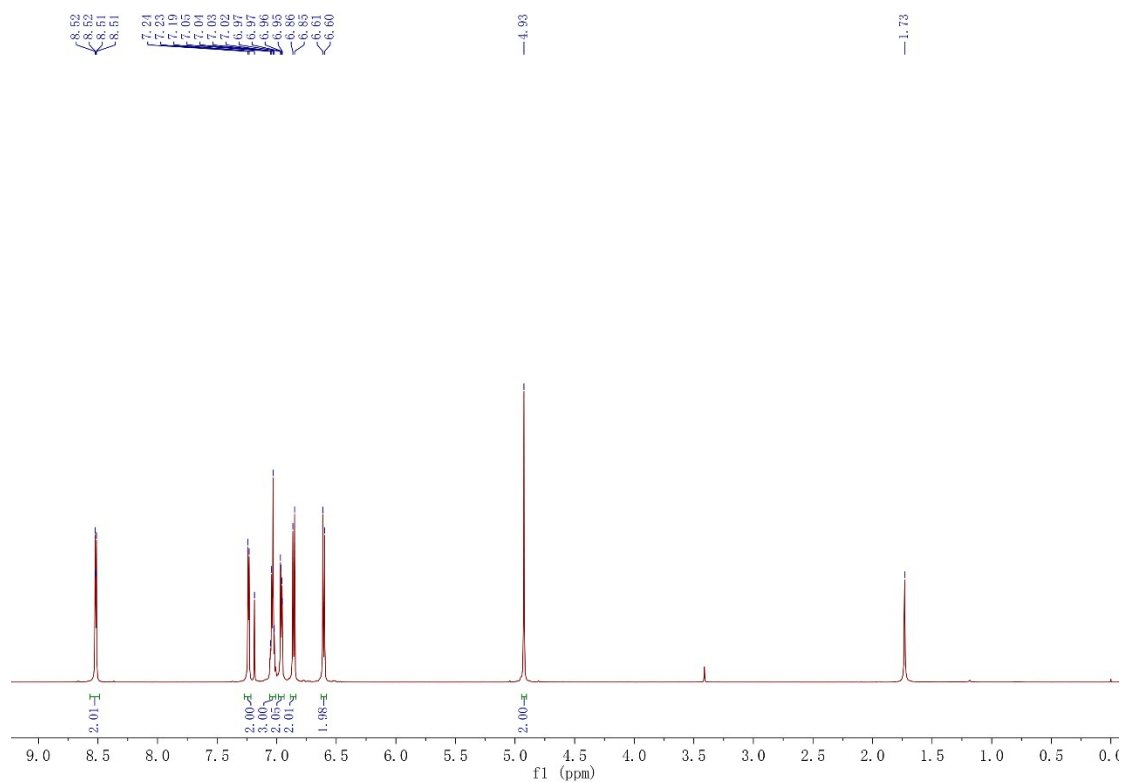

Fig. S16 <sup>1</sup>H NMR spectrum of compound TPE-2by-3-E in CDCl<sub>3</sub>.

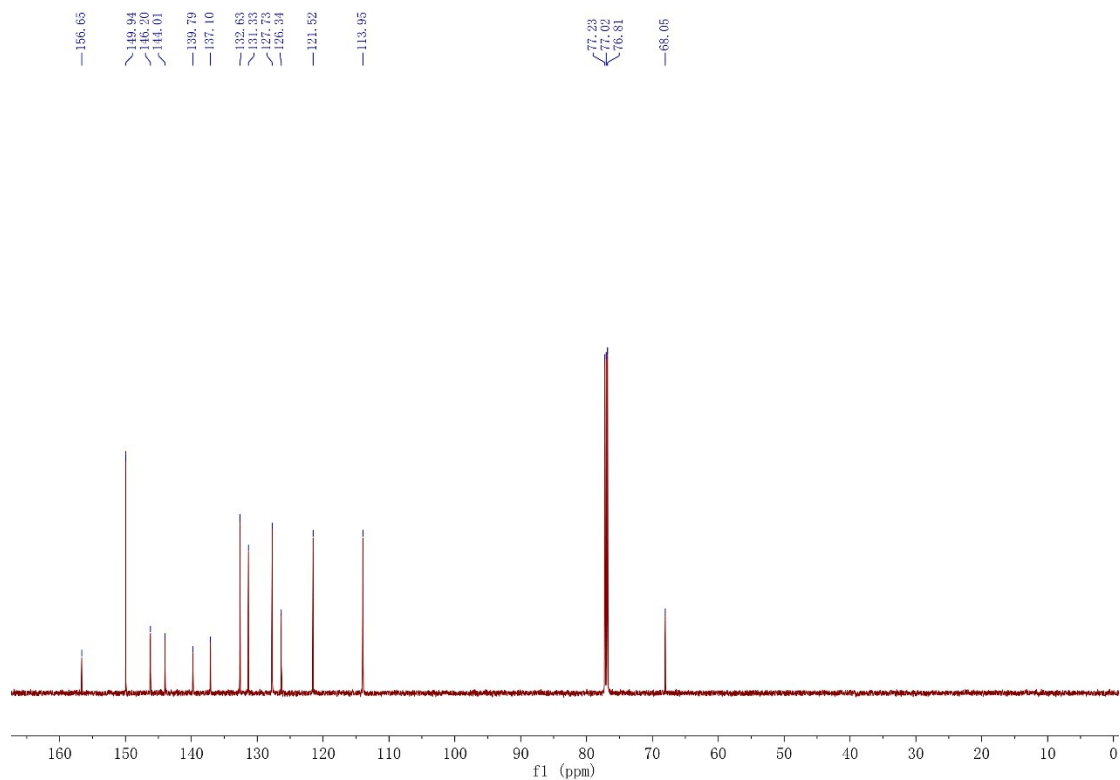

**Fig. S17**  $^{13}\text{C}$  NMR spectrum of compound TPE-2by-3-E in  $\text{CDCl}_3$ .

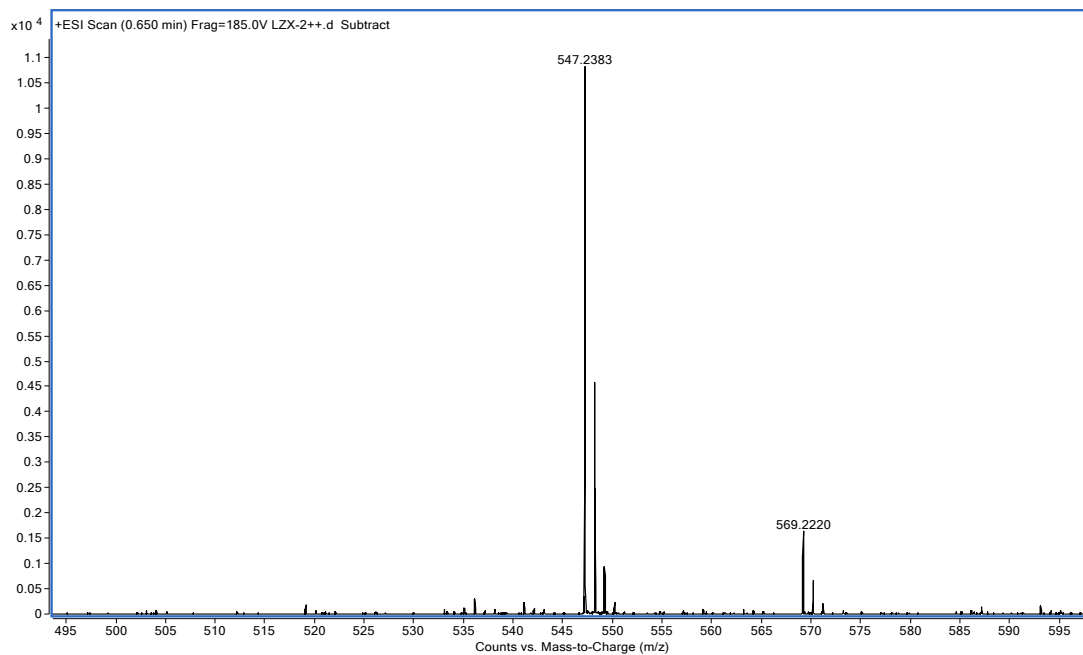

**Fig. S18** High-resolution mass spectrum of compound TPE-2by-3-E.

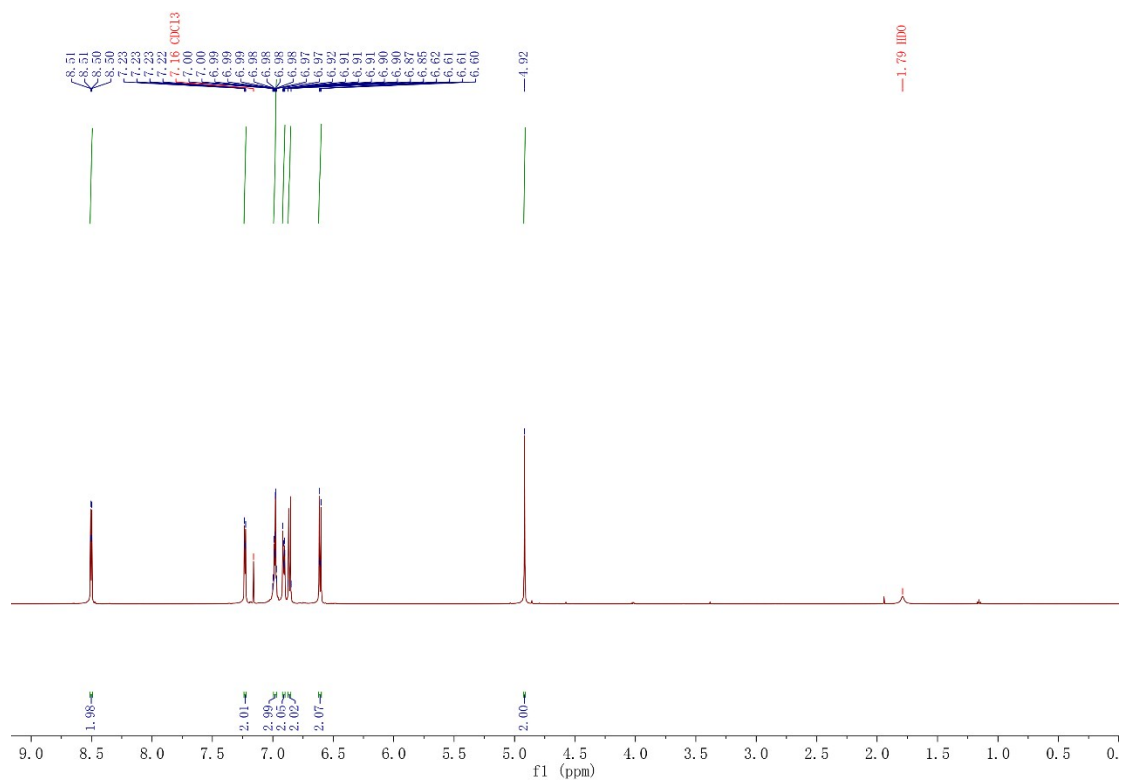

Fig. S19  $^1\text{H}$  NMR spectrum of compound TPE-2by-3-Z in  $\text{CDCl}_3$ .

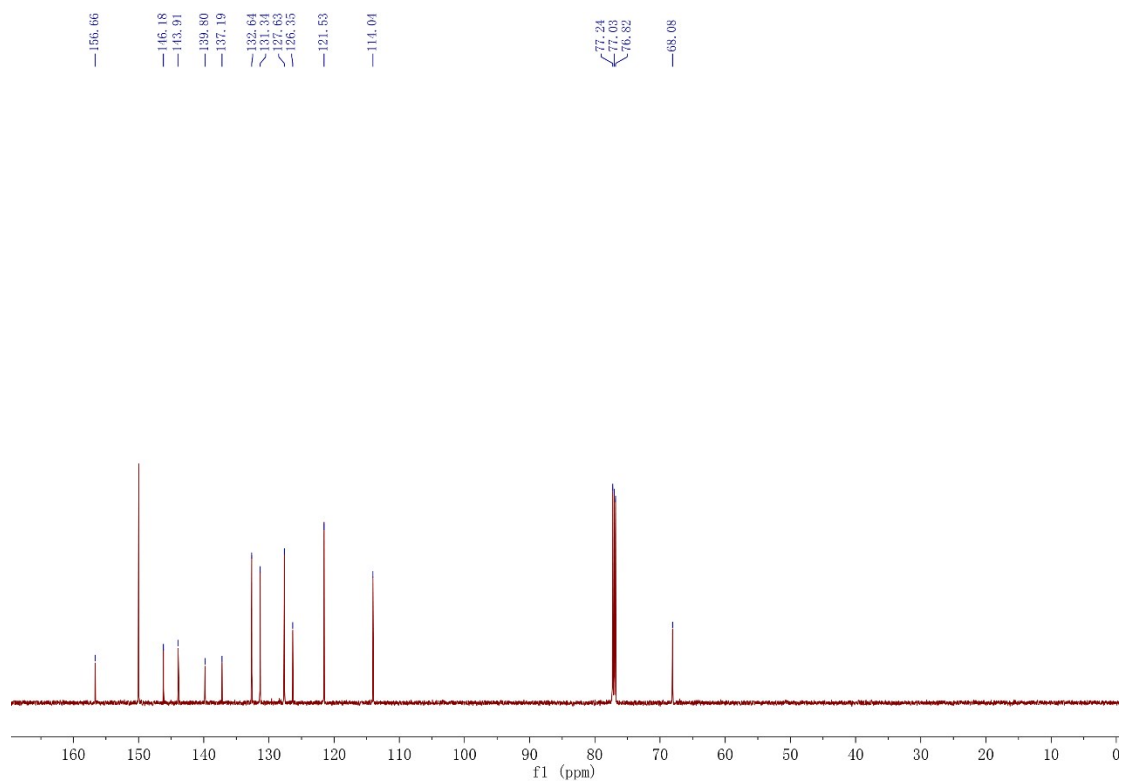

Fig. S20  $^{13}\text{C}$  NMR spectrum of compound TPE-2by-3-Z in  $\text{CDCl}_3$ .



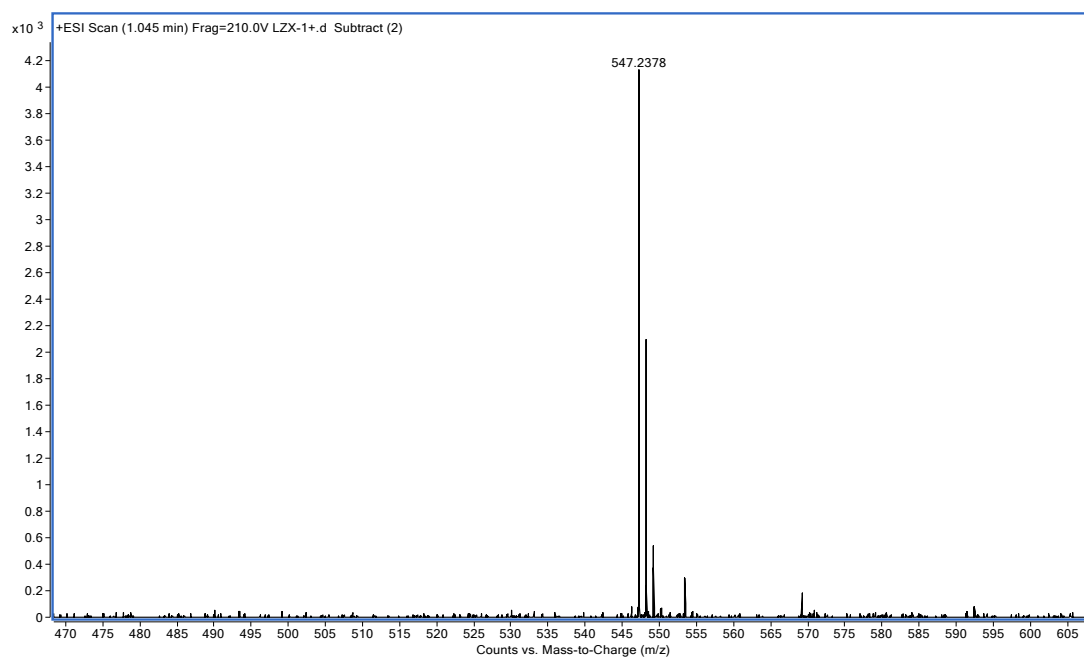

Fig. S21 High-resolution mass spectrum of compound TPE-2by-3-Z.

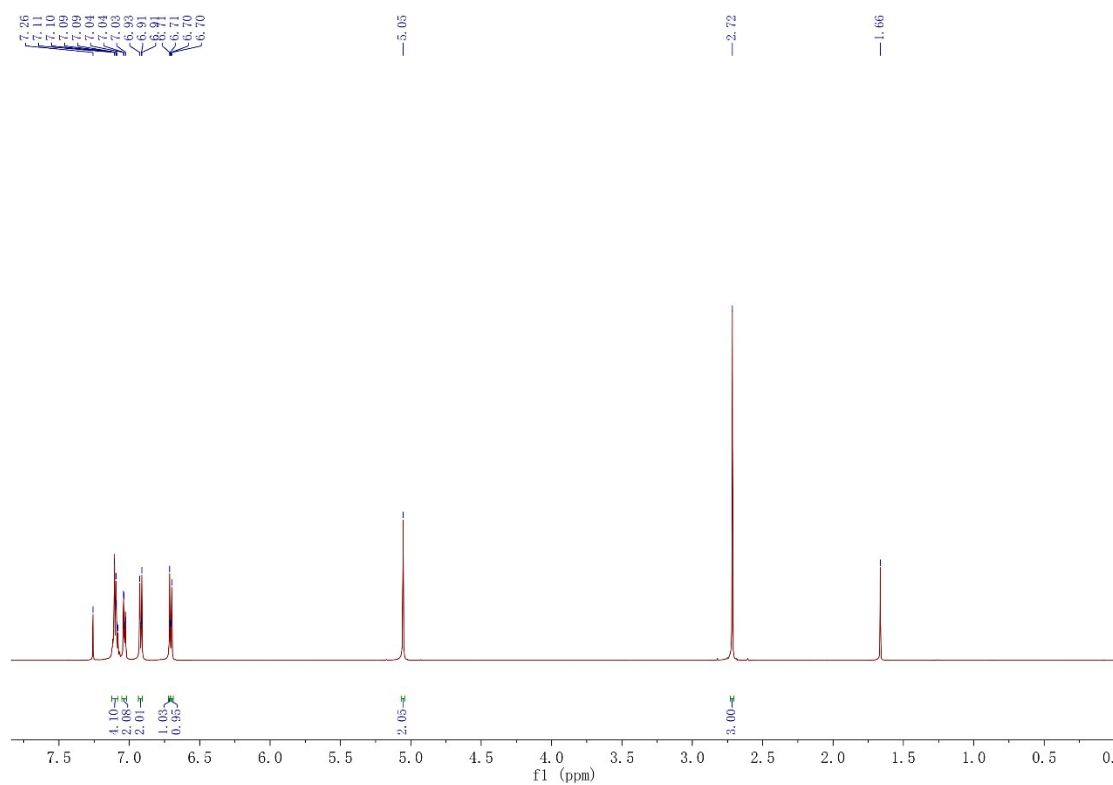

Fig. S22  $^1\text{H}$  NMR spectrum of compound TPE-2TZ-E in  $\text{CDCl}_3$ .

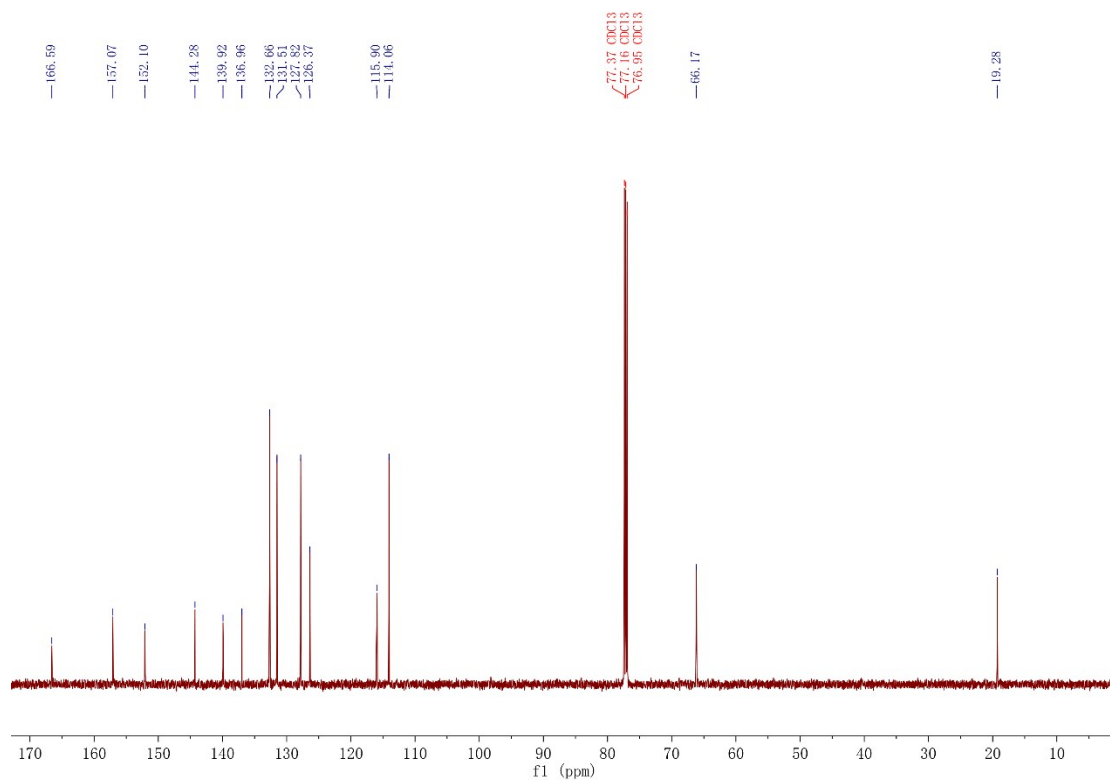

**Fig. S23**  $^{13}\text{C}$  NMR spectrum of compound TPE-2TZ-E in  $\text{CDCl}_3$ .

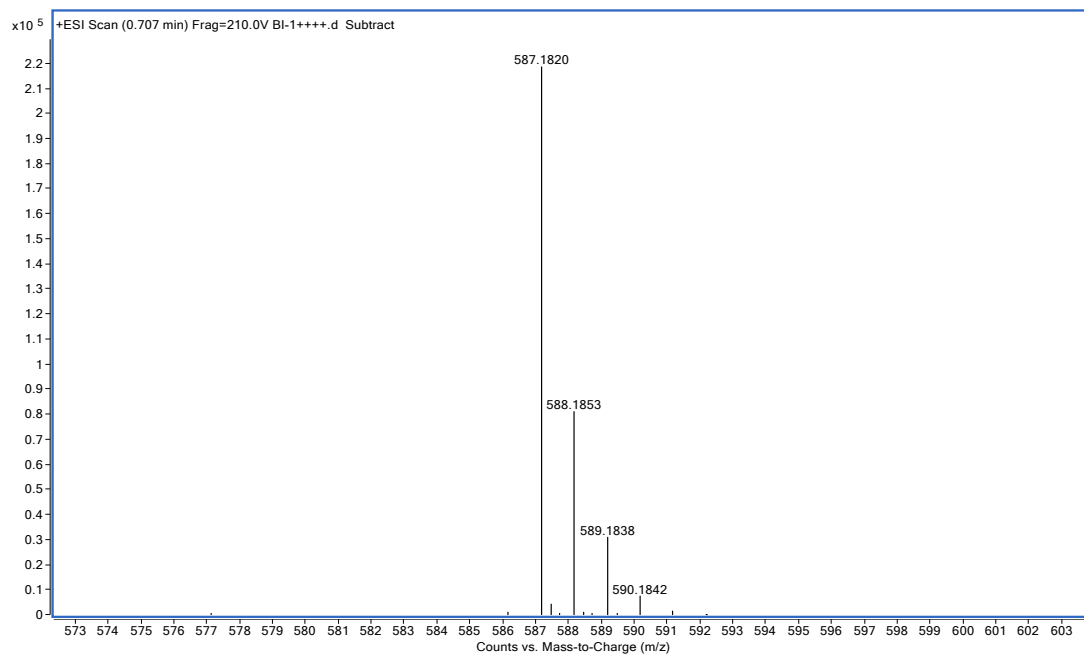

**Fig. S24** High-resolution mass spectrum of compound TPE-2TZ-E.

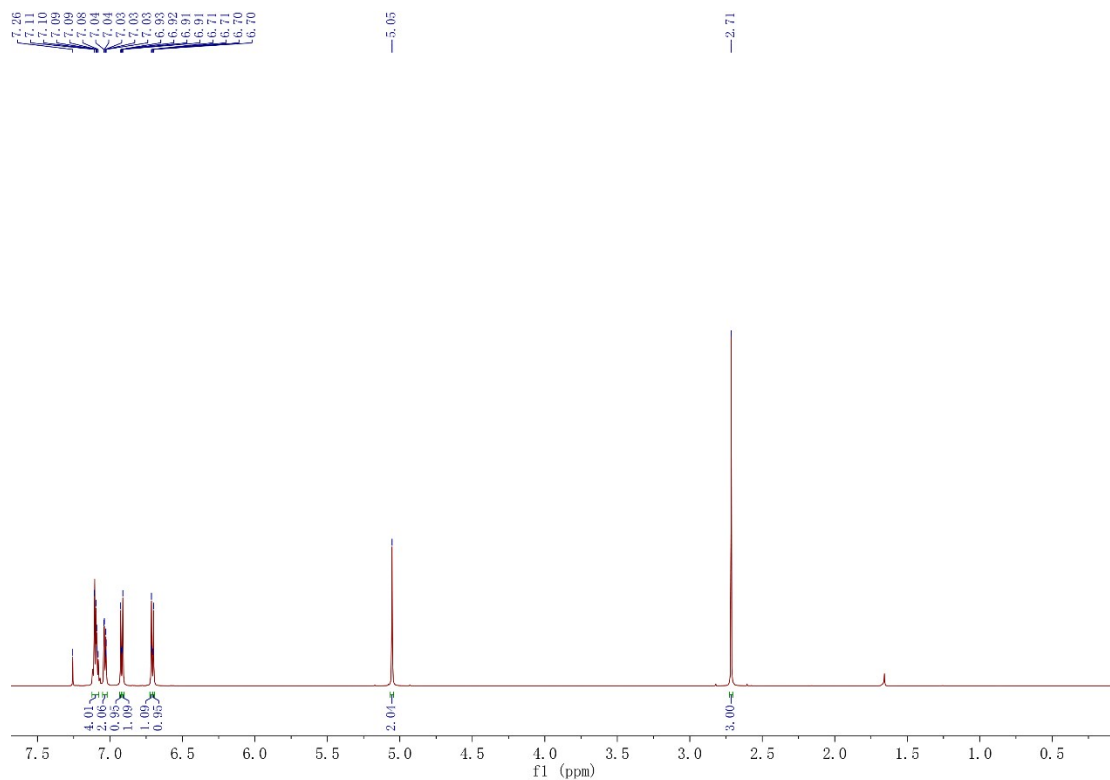

Fig. S25  $^1\text{H}$  NMR spectrum of compound TPE-2TZ-Z in  $\text{CDCl}_3$ .

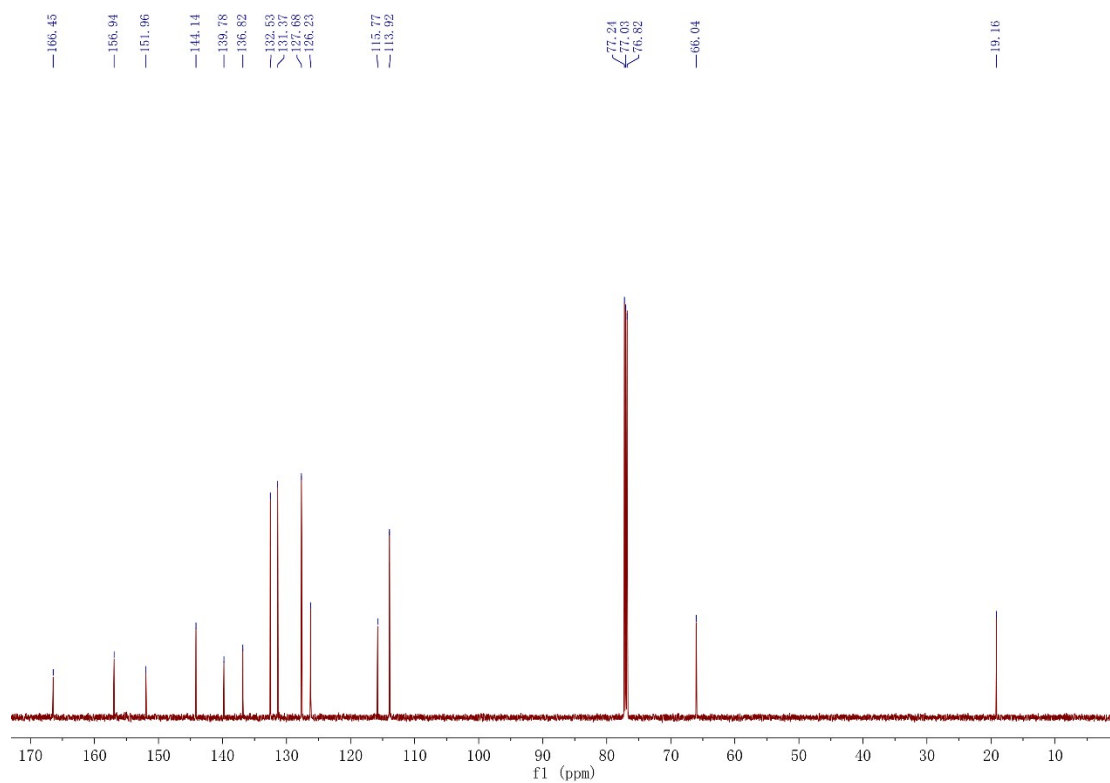

Fig. S26  $^{13}\text{C}$  NMR spectrum of compound TPE-2TZ-Z in  $\text{CDCl}_3$ .

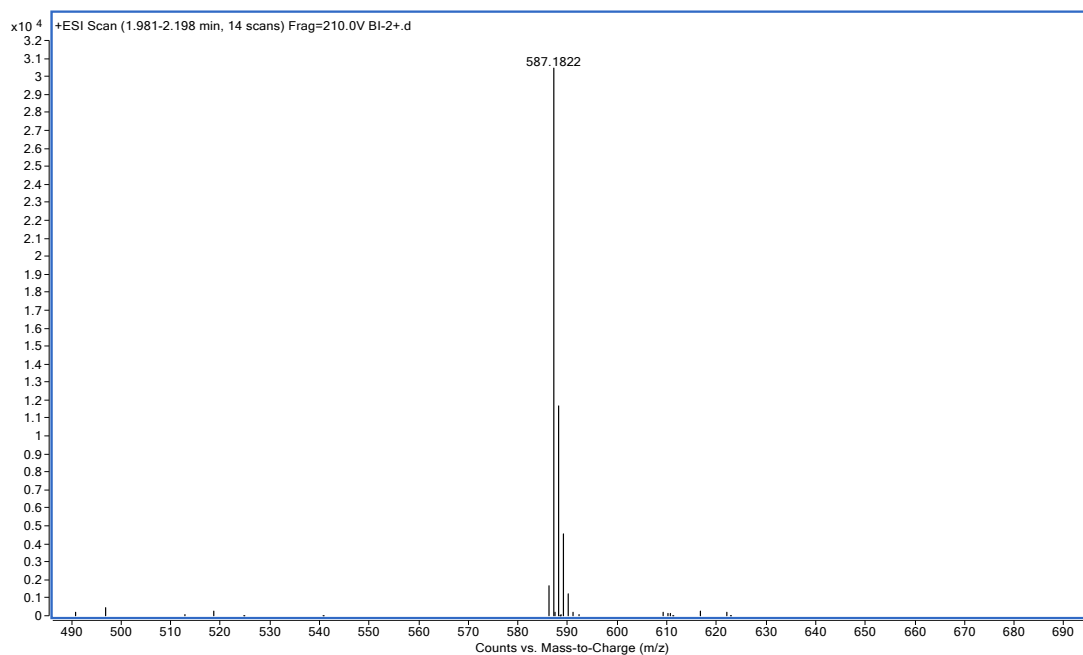

**Fig. S27** High-resolution mass spectrum of compound TPE-2TZ-Z.

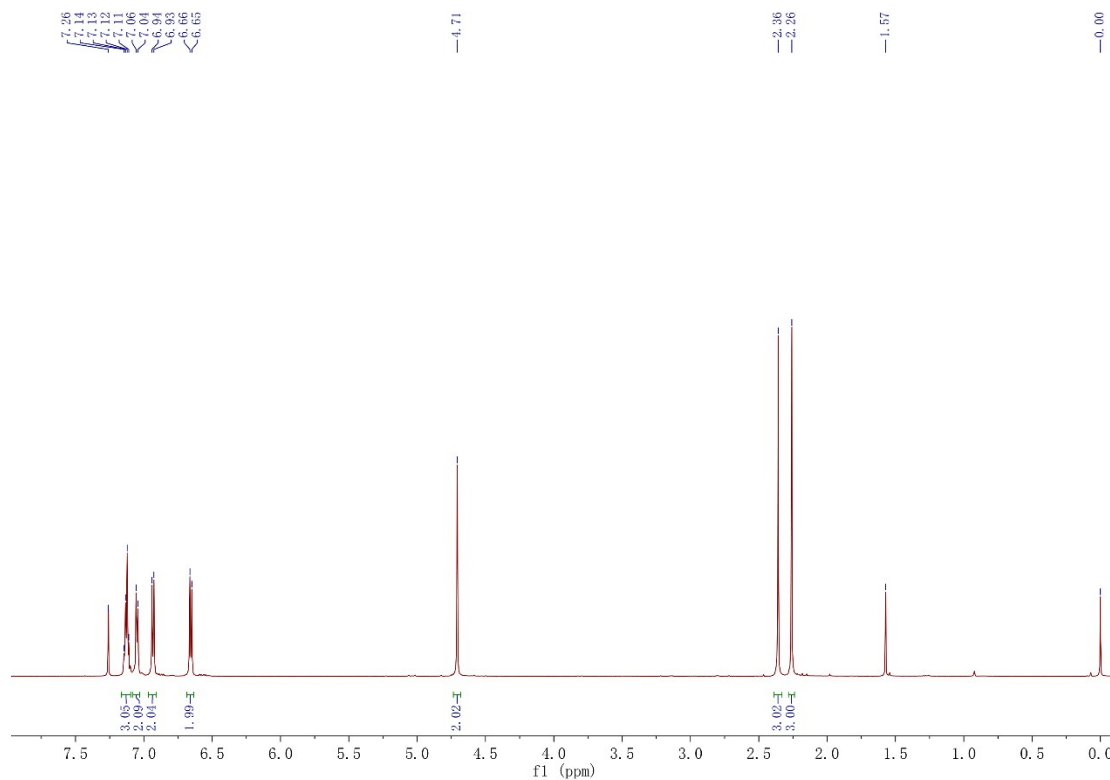

**Fig. S28**  $^1\text{H}$  NMR spectrum of compound TPE-2EZ-E in  $\text{CDCl}_3$ .

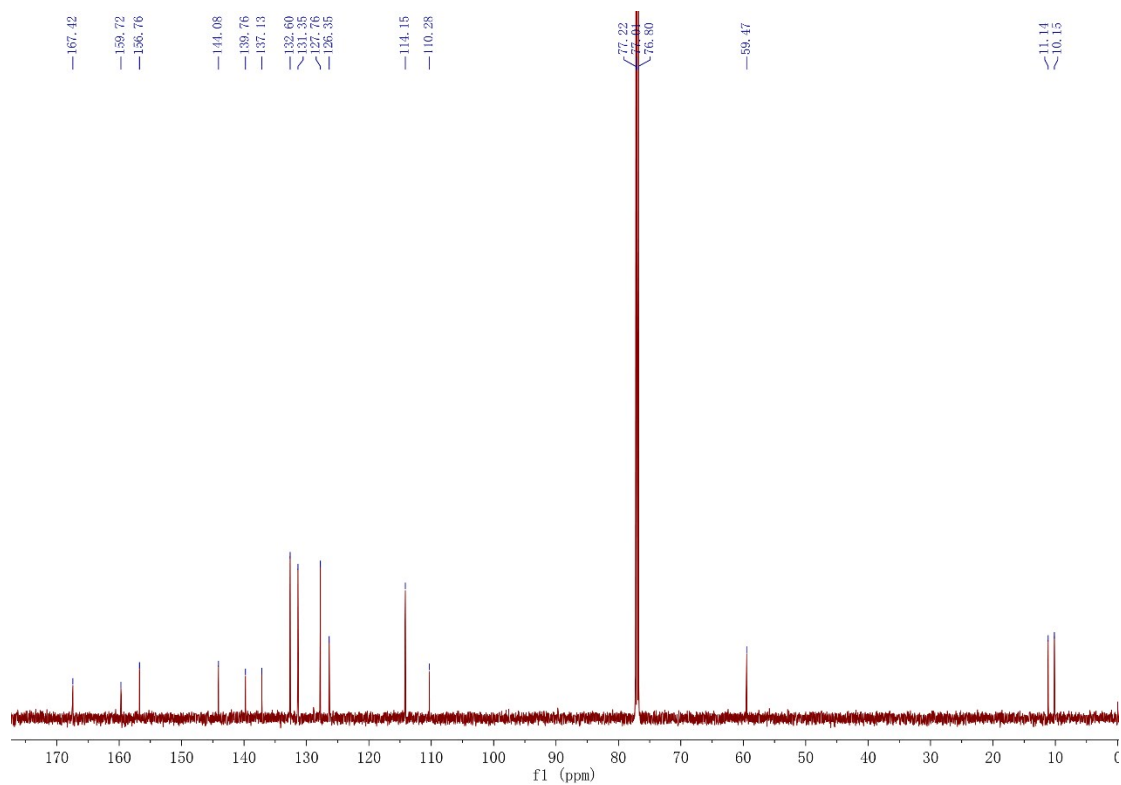

**Fig. S29**  $^{13}\text{C}$  NMR spectrum of compound TPE-2EZ-E in  $\text{CDCl}_3$ .

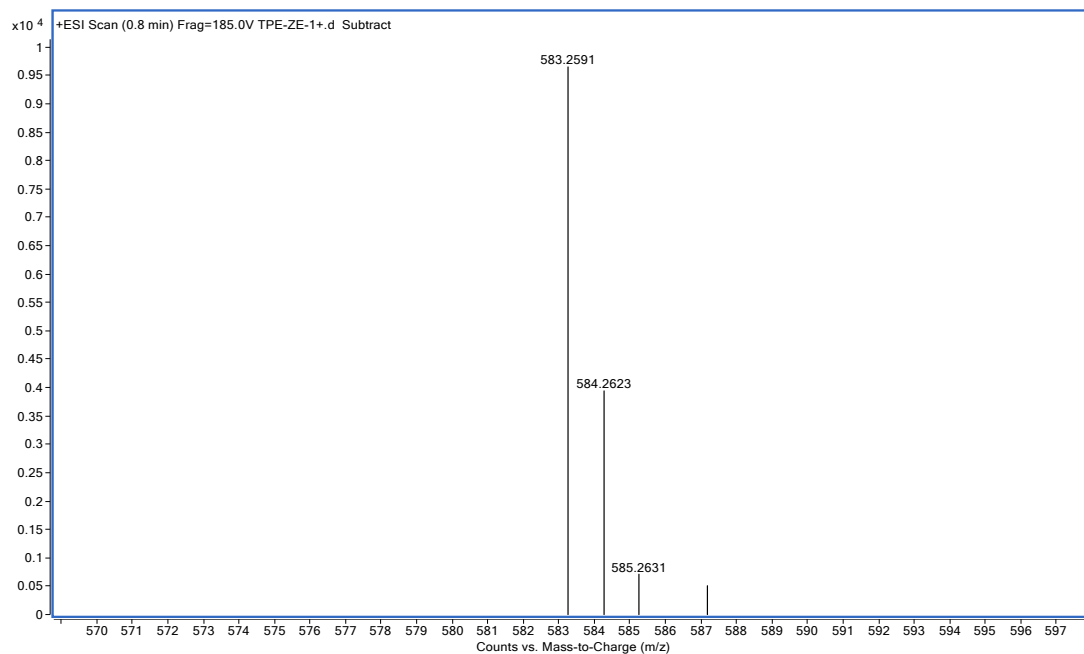

**Fig. S30** High-resolution mass spectrum of compound TPE-2EZ-E.

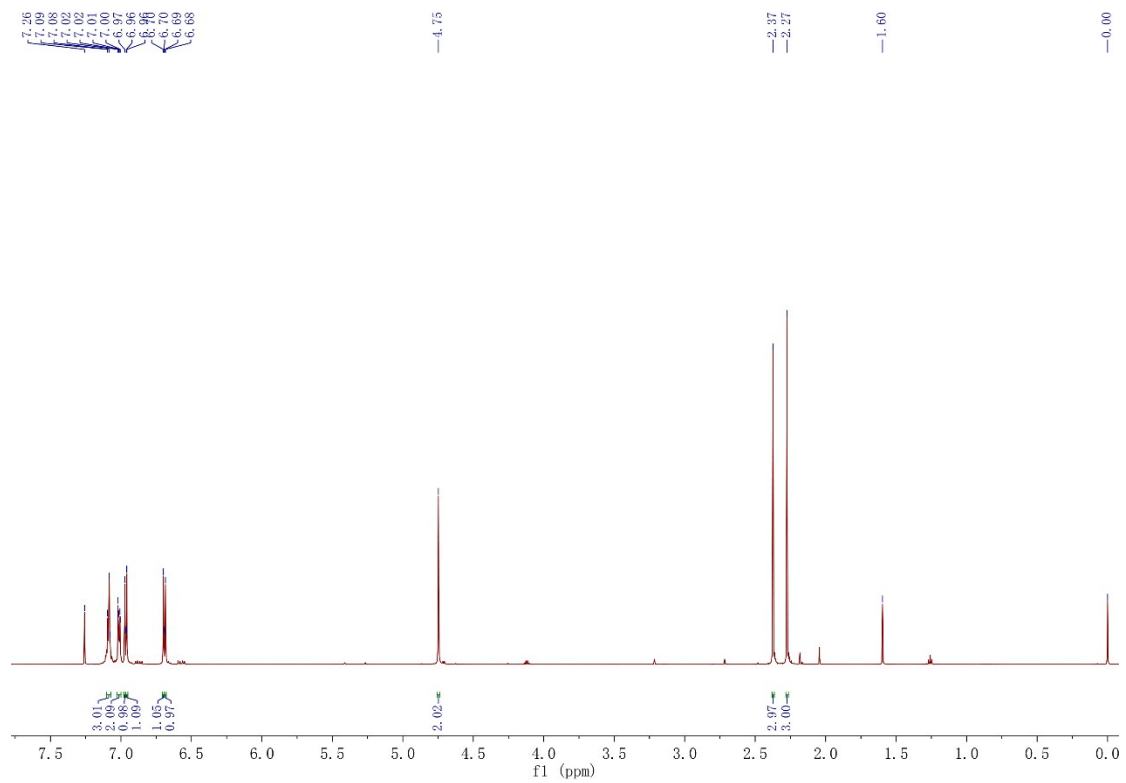

Fig. S31  $^1\text{H}$  NMR spectrum of compound TPE-2EZ-Z in  $\text{CDCl}_3$ .

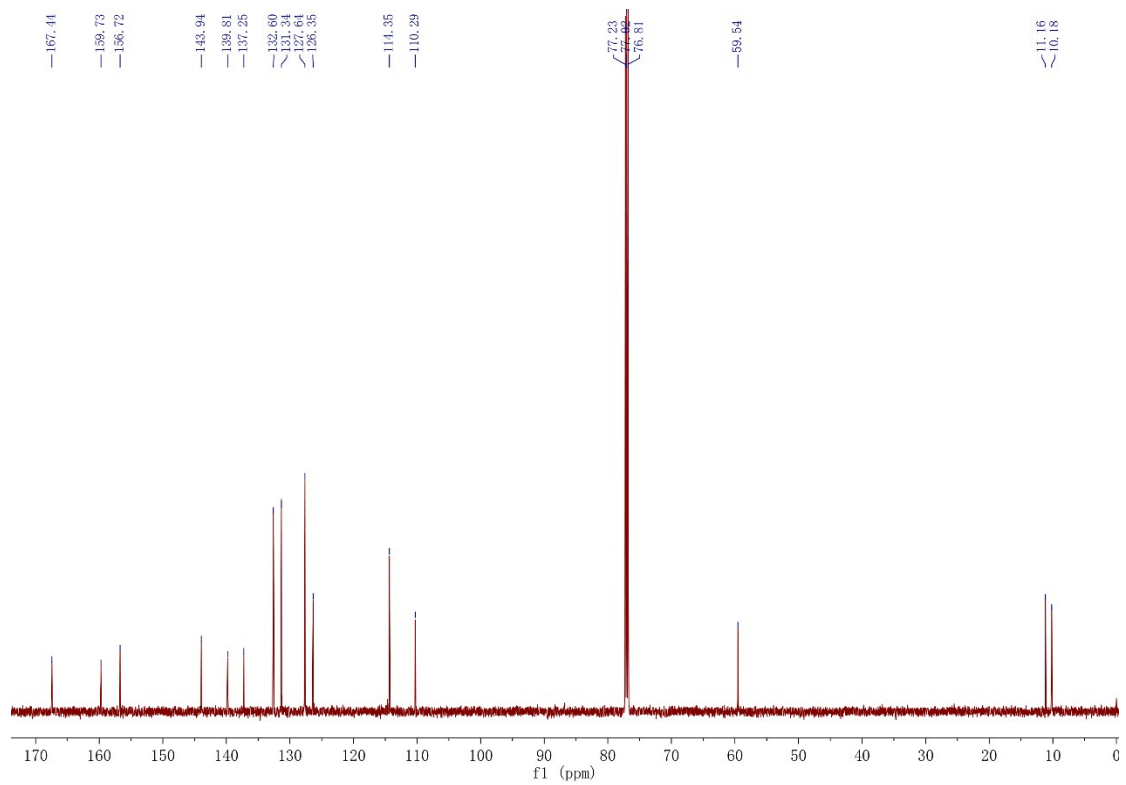

Fig. S32  $^{13}\text{C}$  NMR spectrum of compound TPE-2EZ-Z in  $\text{CDCl}_3$ .

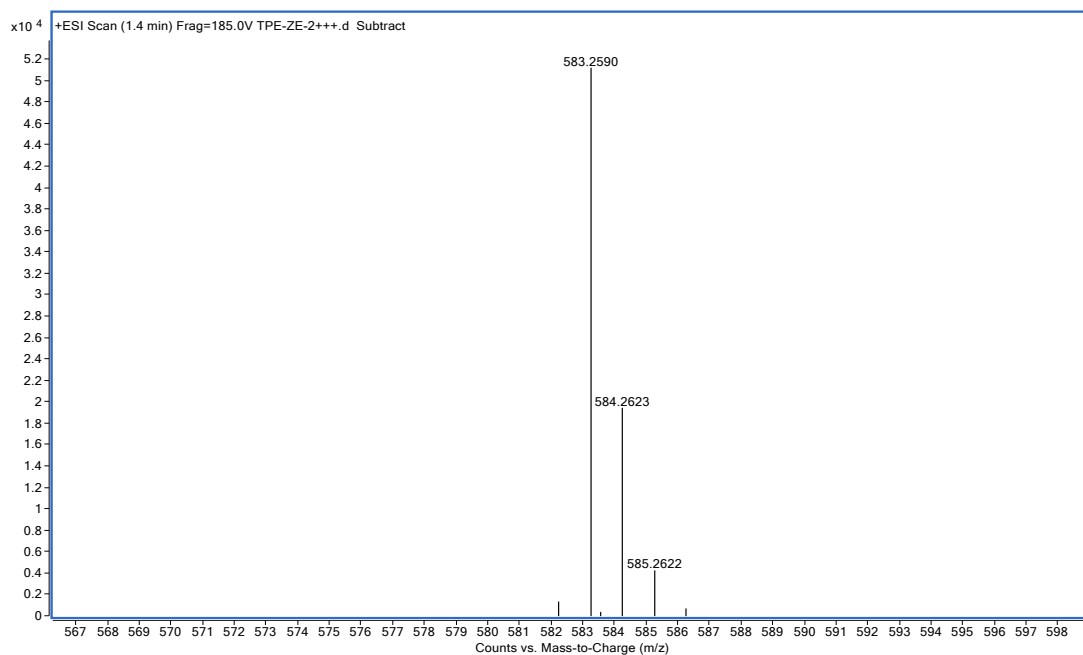

**Fig. S33** High-resolution mass spectrum of compound TPE-2EZ-Z.

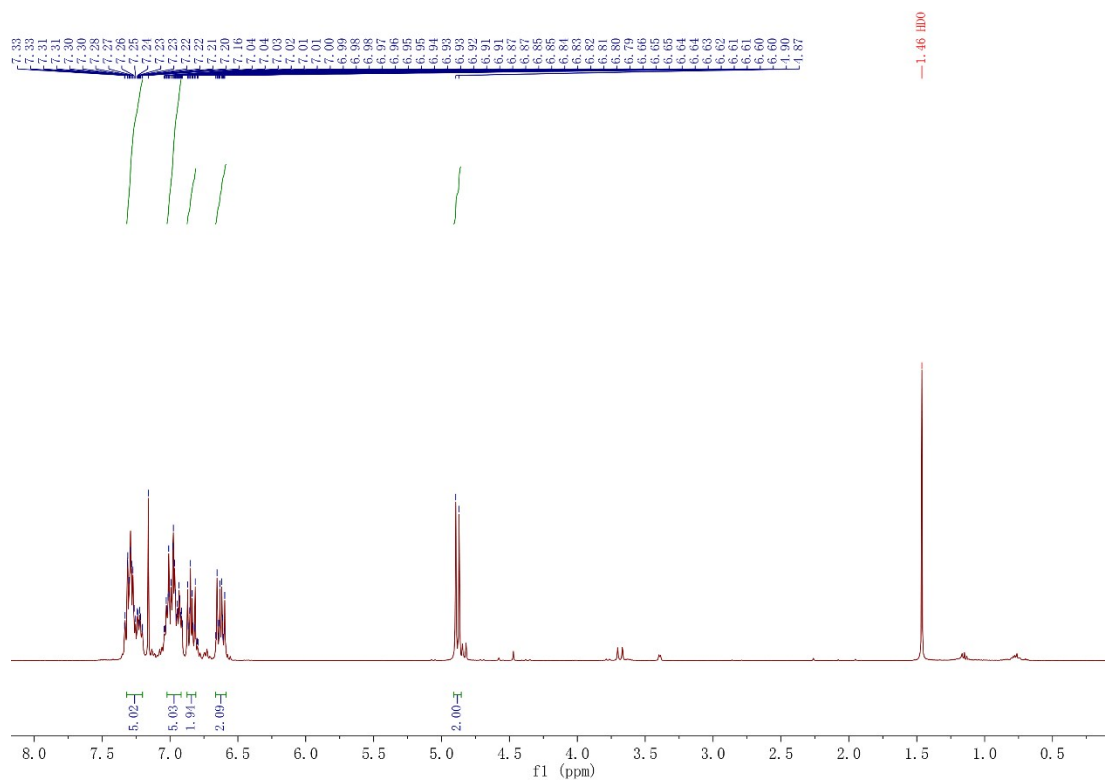

**Fig. S34** <sup>1</sup>H NMR spectrum of compound TPE-2B in CDCl<sub>3</sub>.

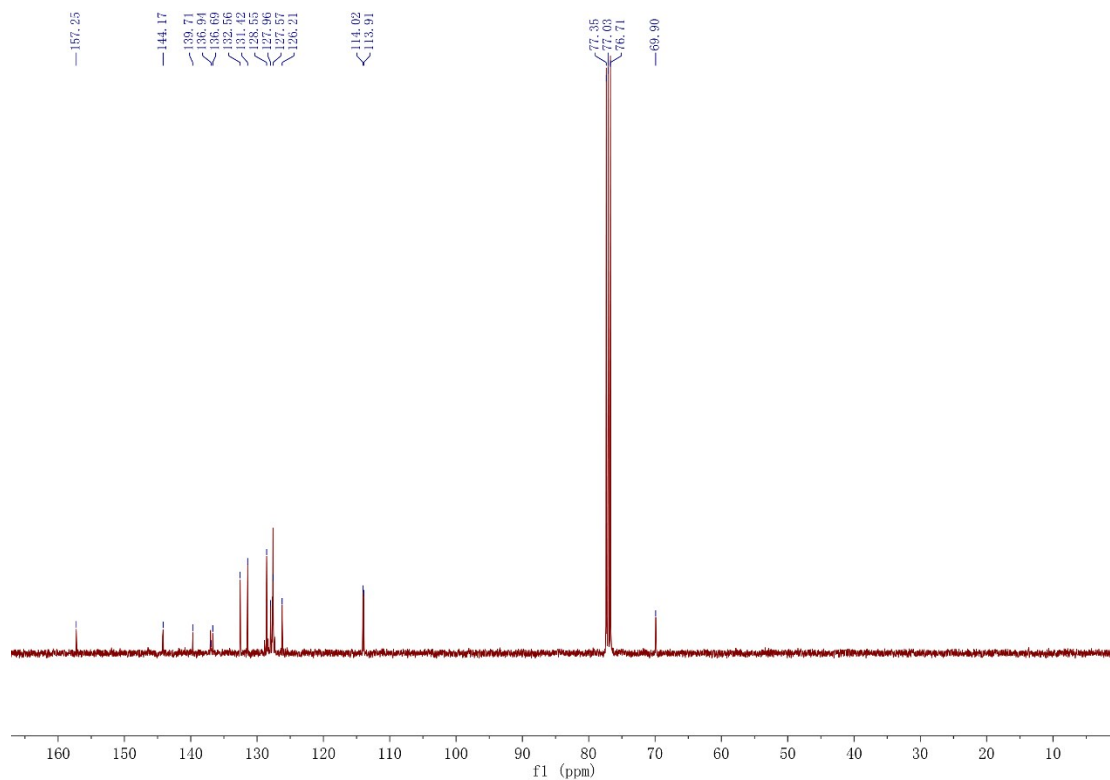

Fig. S35  $^{13}\text{C}$  NMR spectrum of compound TPE-2B in  $\text{CDCl}_3$ .

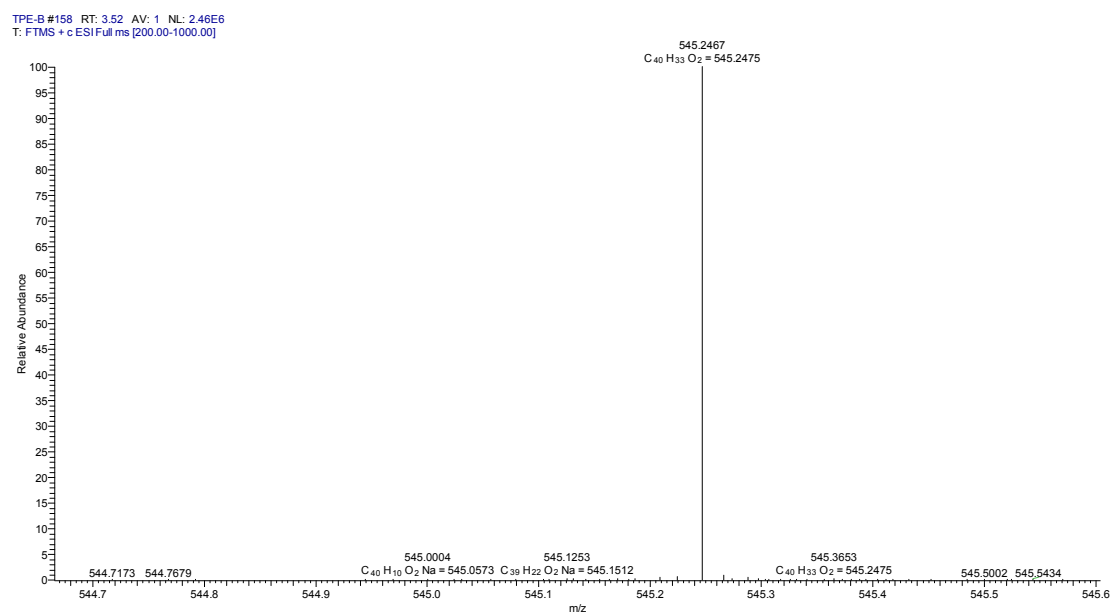

Fig. S36 High-resolution mass spectrum of compound TPE-2B.



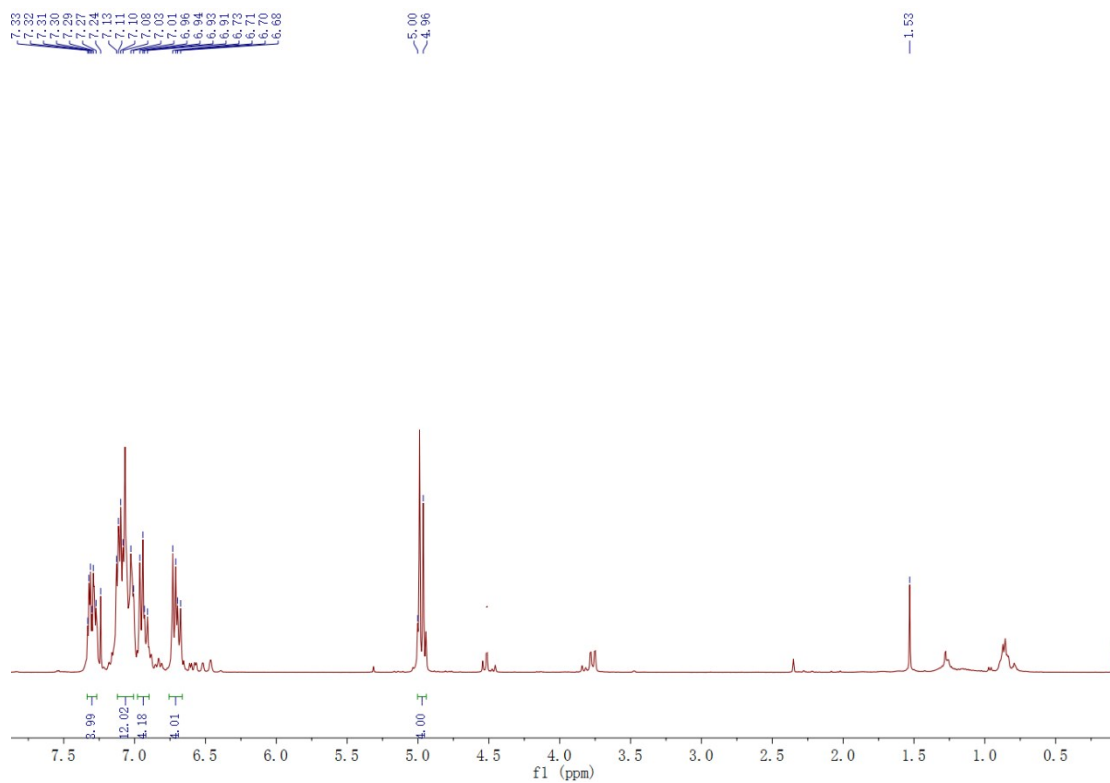

**Fig. S37**  $^1\text{H}$  NMR spectrum of compound TPE-2T in  $\text{CDCl}_3$ .

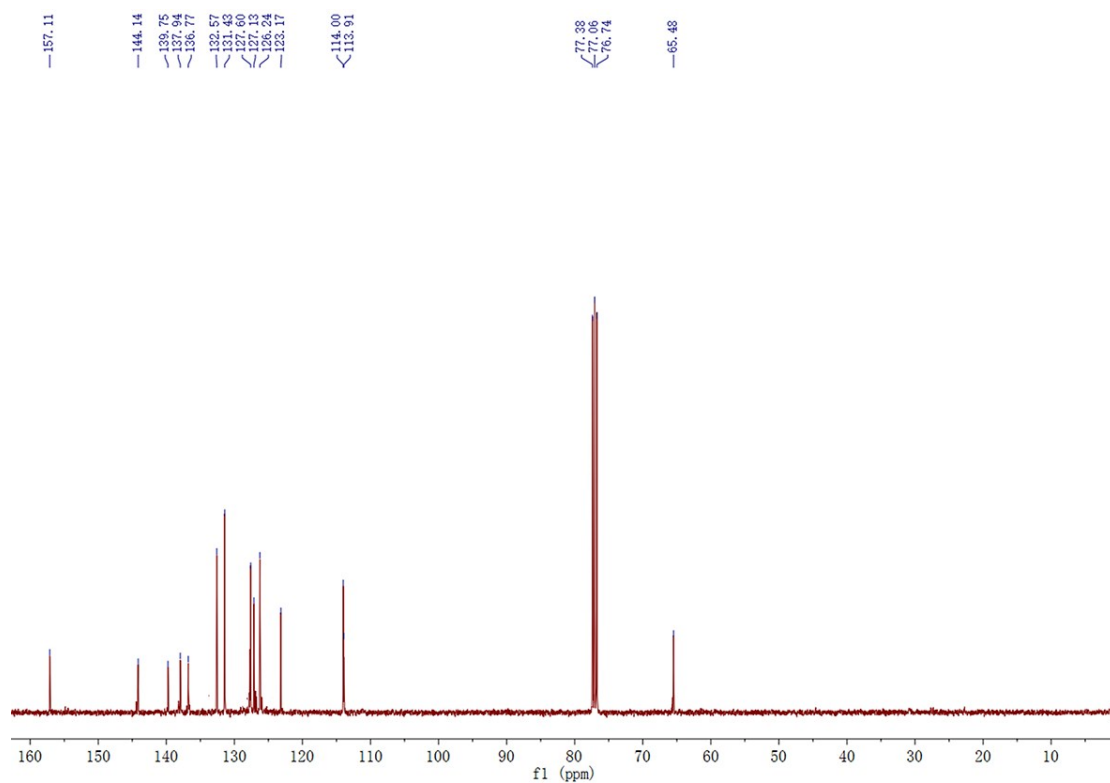

**Fig. S38**  $^{13}\text{C}$  NMR spectrum of compound TPE-2T in  $\text{CDCl}_3$ .

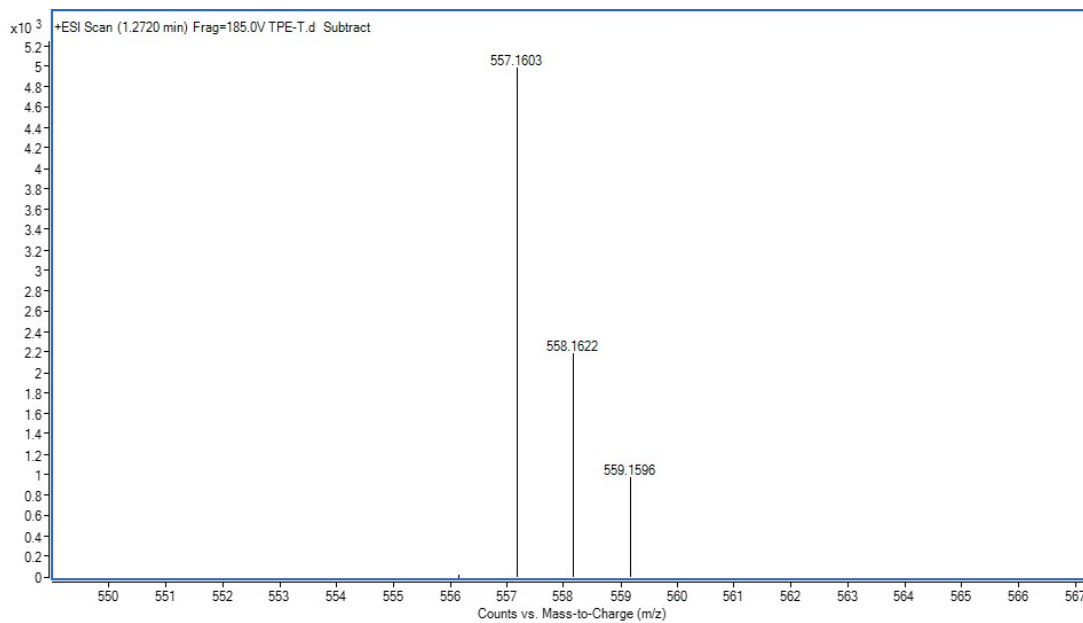

9

**Fig. S39** High-resolution mass spectrum of compound TPE-2T.

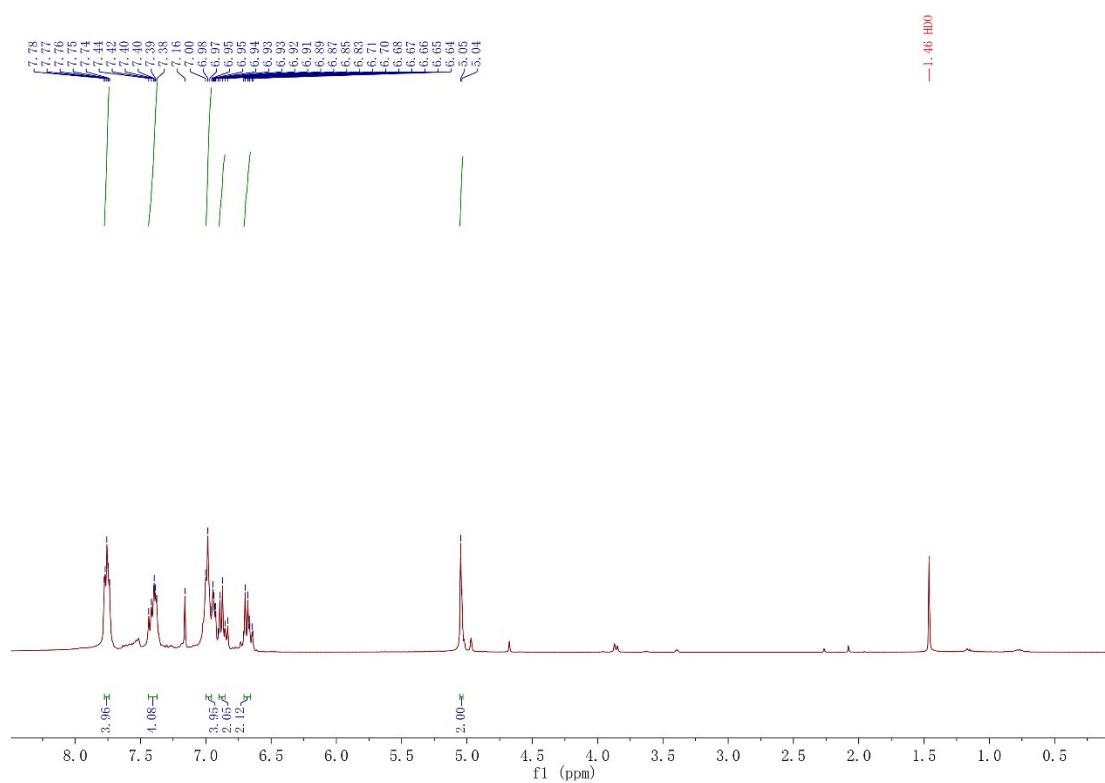

**Fig. S40** <sup>1</sup>H NMR spectrum of compound TPE-2N in CDCl<sub>3</sub>.

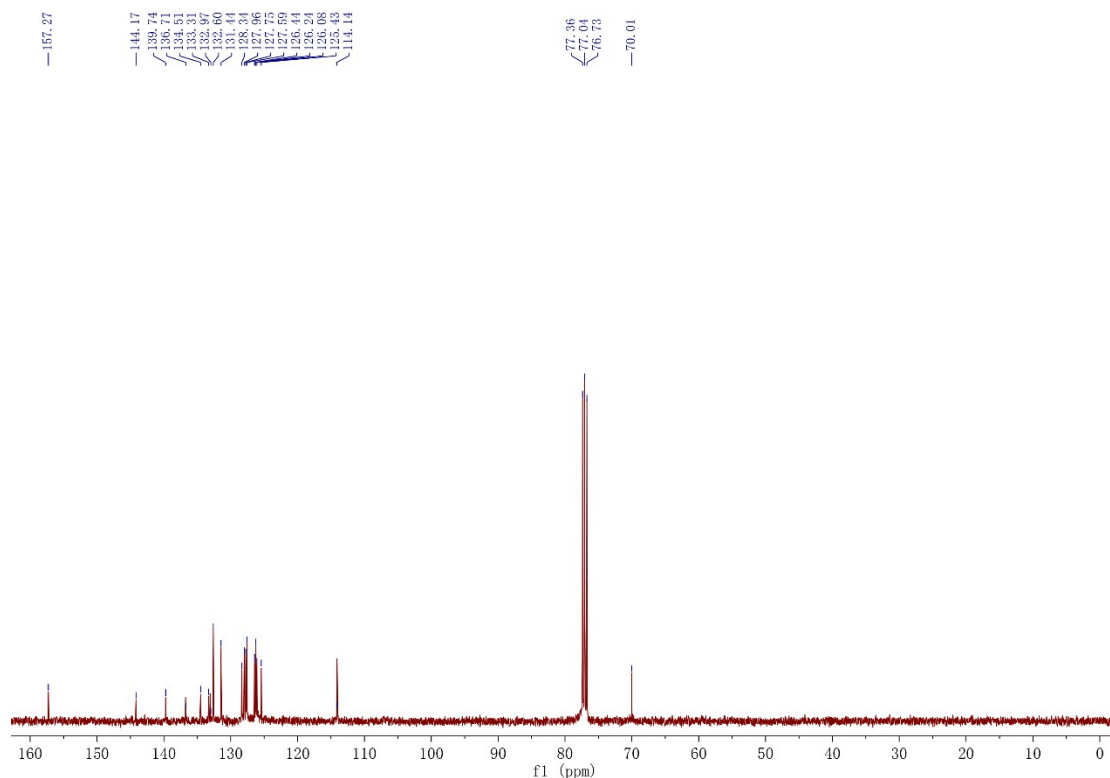

Fig. S41  $^{13}\text{C}$  NMR spectrum of compound TPE-2N in  $\text{CDCl}_3$ .

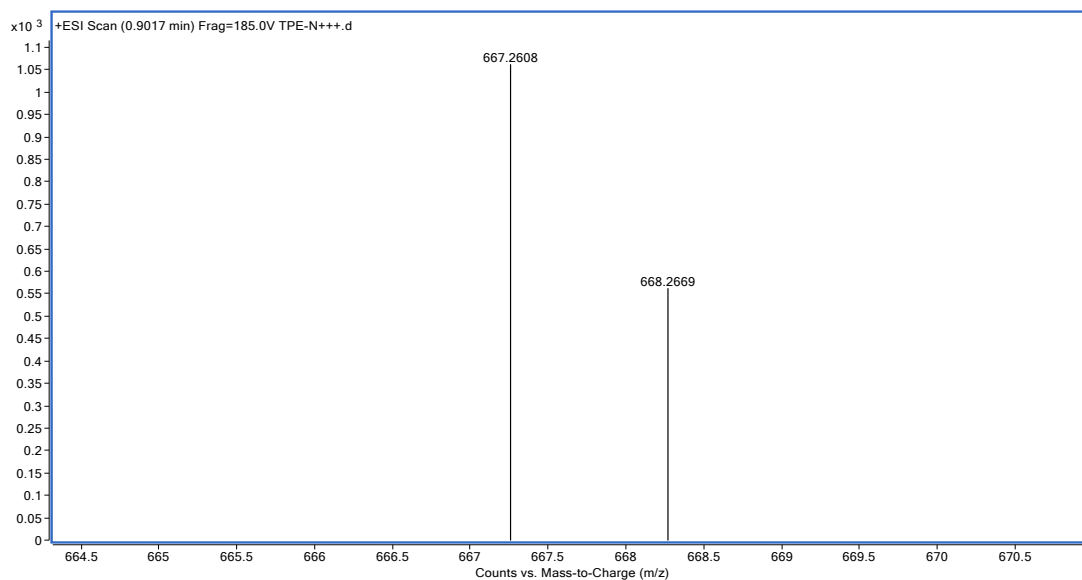

Fig. S42 High-resolution mass spectrum of compound TPE-2N.

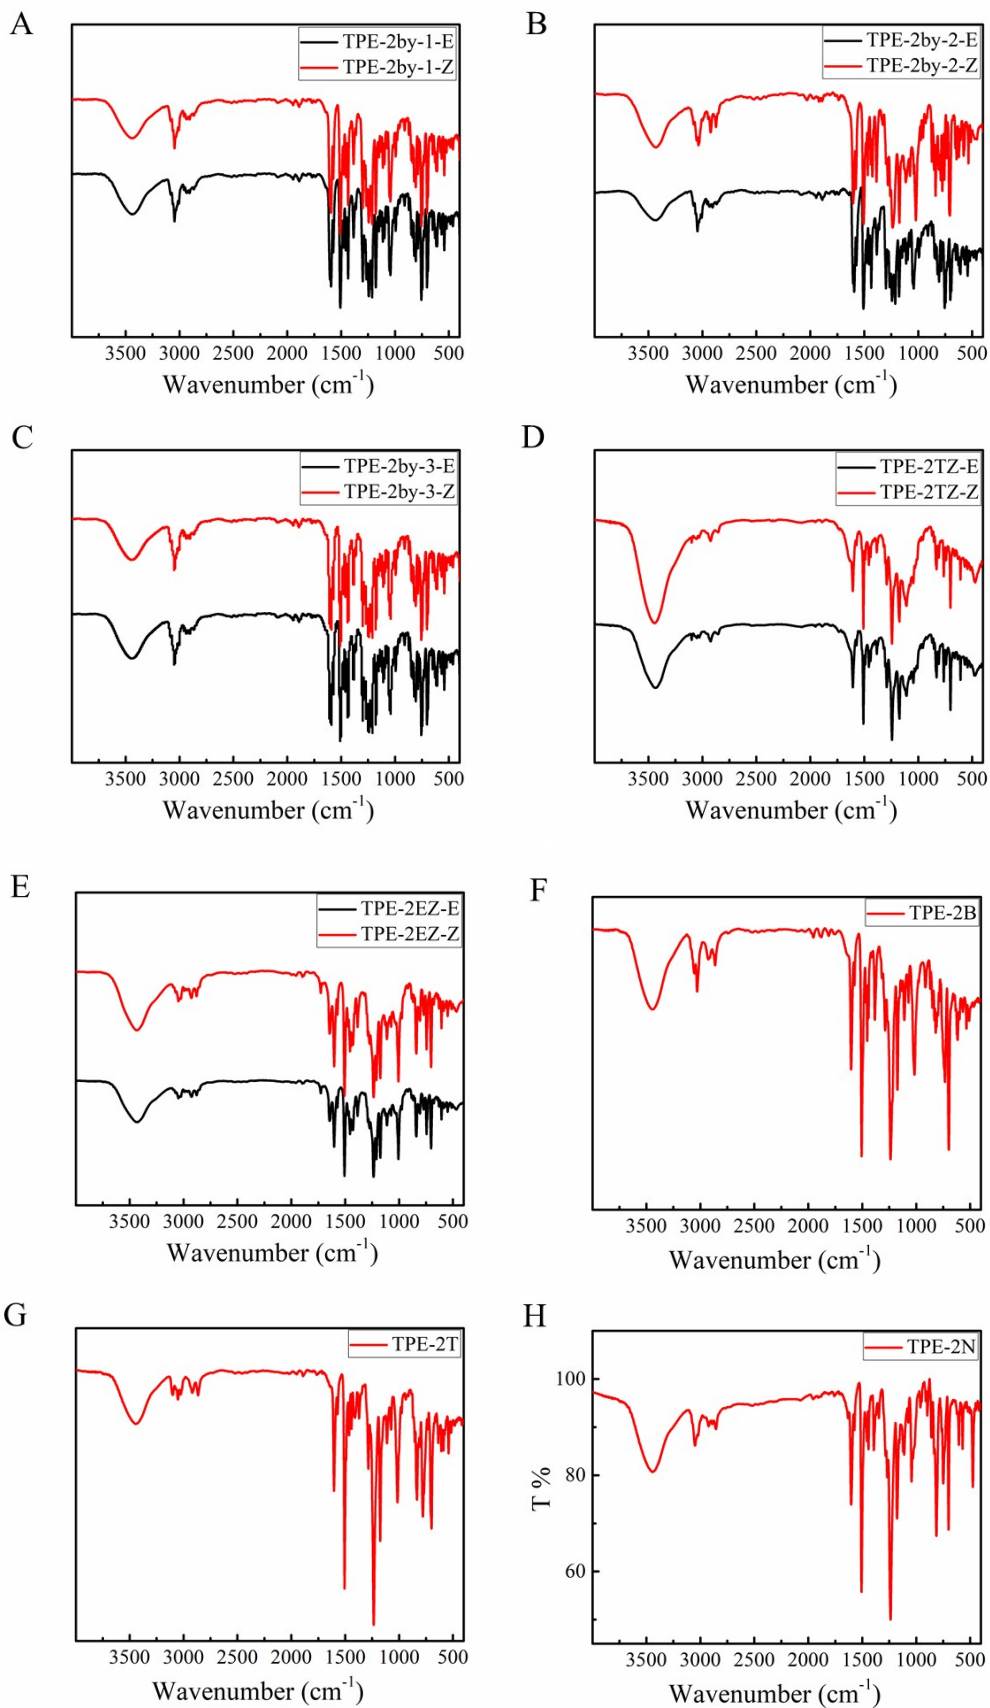

**Fig. S43** FTIR spectra of TPE-2by-1(A), TPE-2by-2(B), TPE-2by-3(C), TPE-2TZ(D), TPE-2EZ(E), TPE-2B(F), TPE-2T(G) and TPE-2N(H).

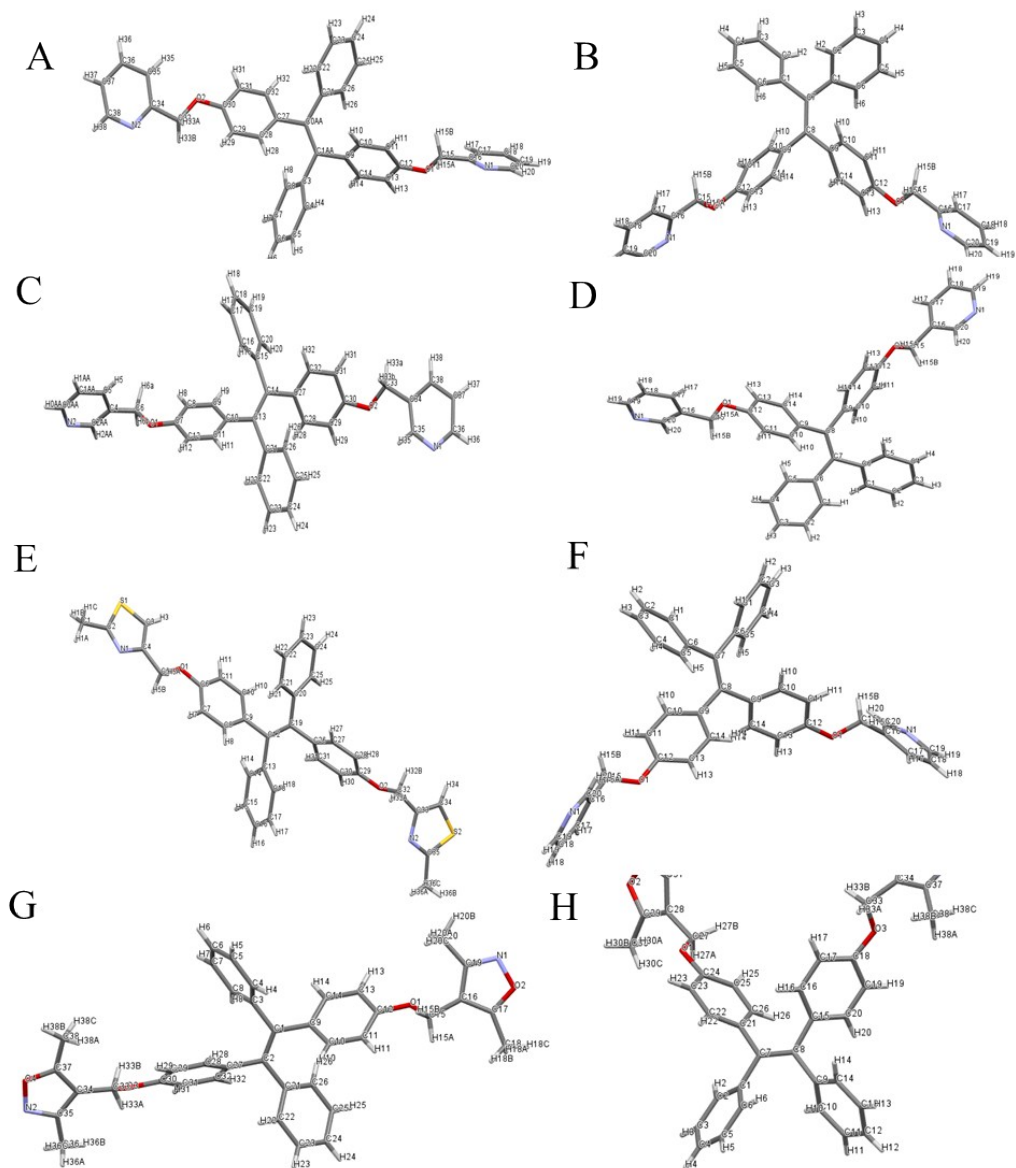

**Fig. S44** Crystal structures of TPE-2by-1-E (A) ,TPE-2by-1-Z (B), TPE-2by-2-E (C) ,TPE-2by-2-Z (D), TPE-2TZ-E (E) ,TPE-2TZ-Z (F), TPE-2EZ-E (G) and TPE-2EZ-Z (H).

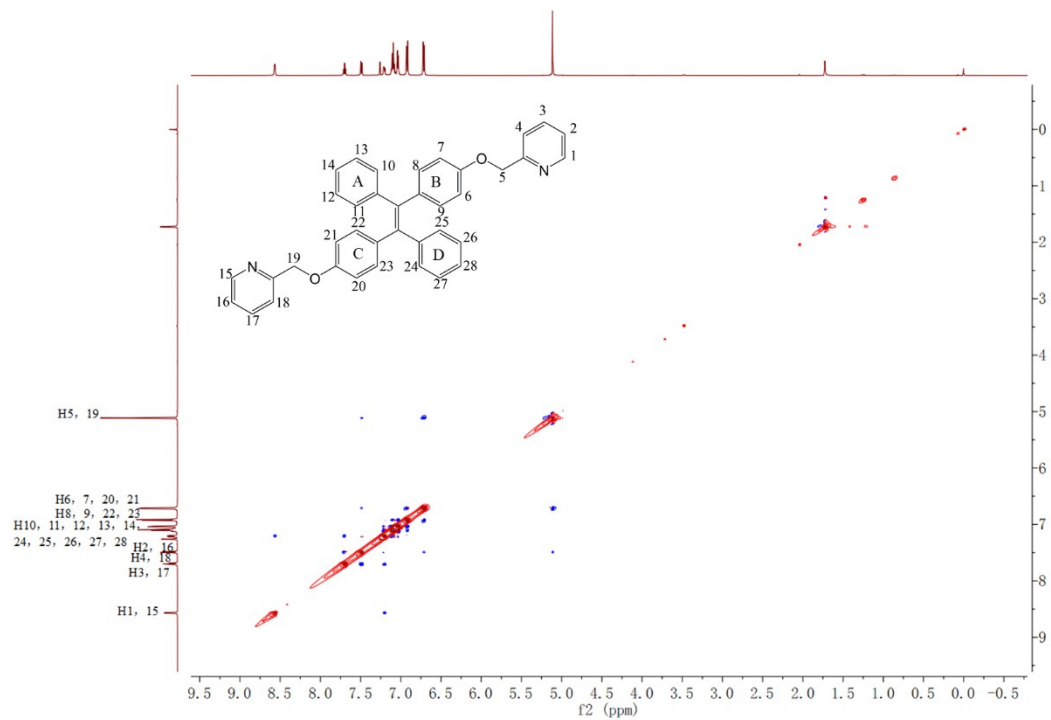

**Fig. S45** NOESY-NMR of TPE-2by-1-E (full).

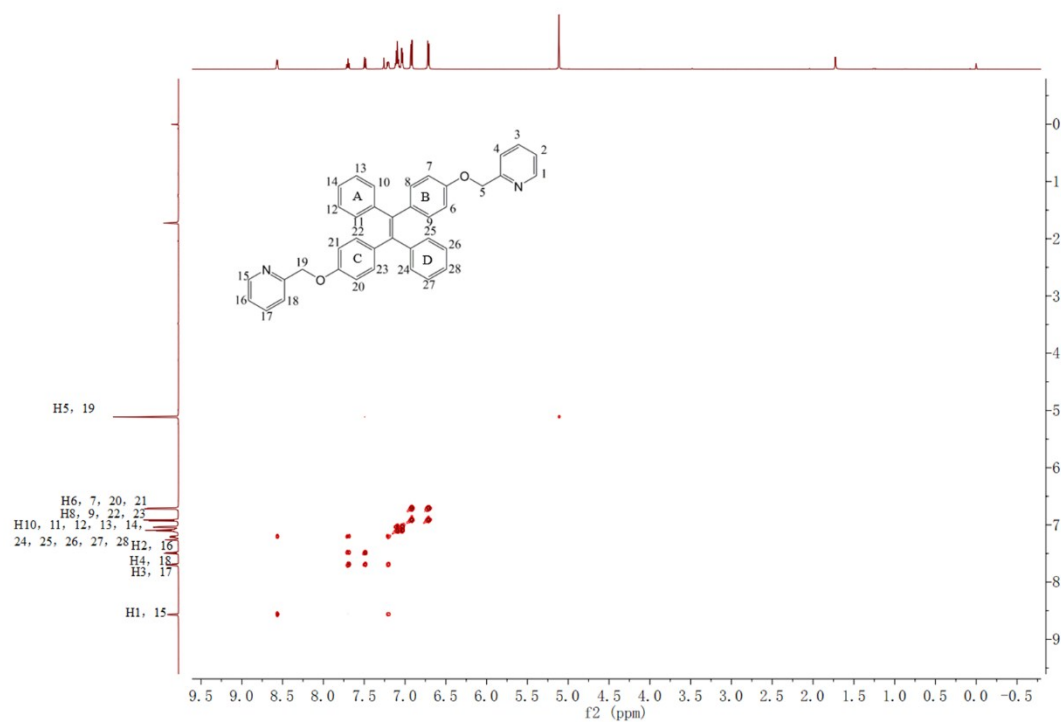

**Fig. S46** COSY-NMR of TPE-2by-1-E (full).

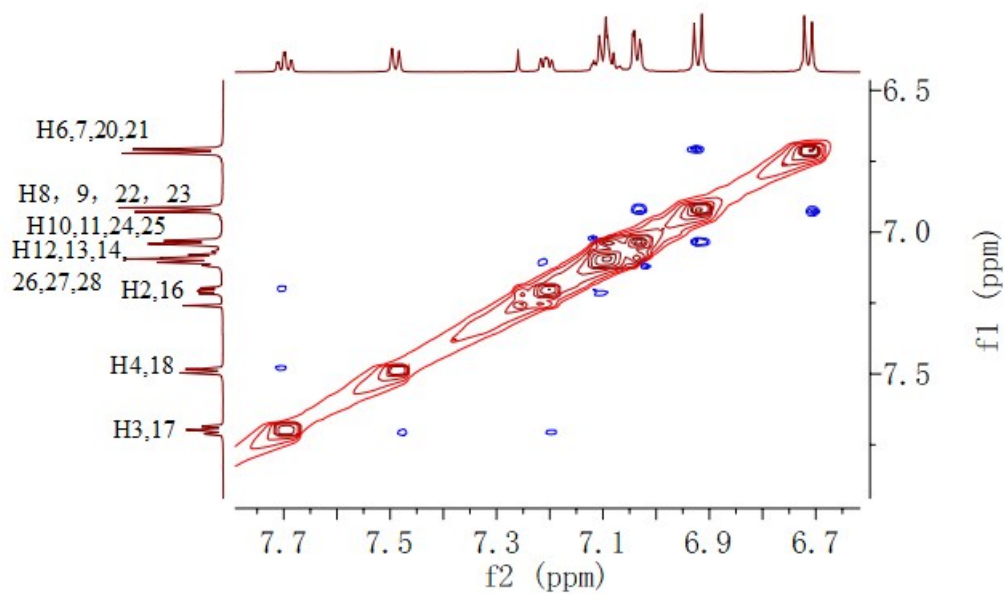

**Fig. S47** NOESY-NMR of TPE-2by-1-E (enlarged).

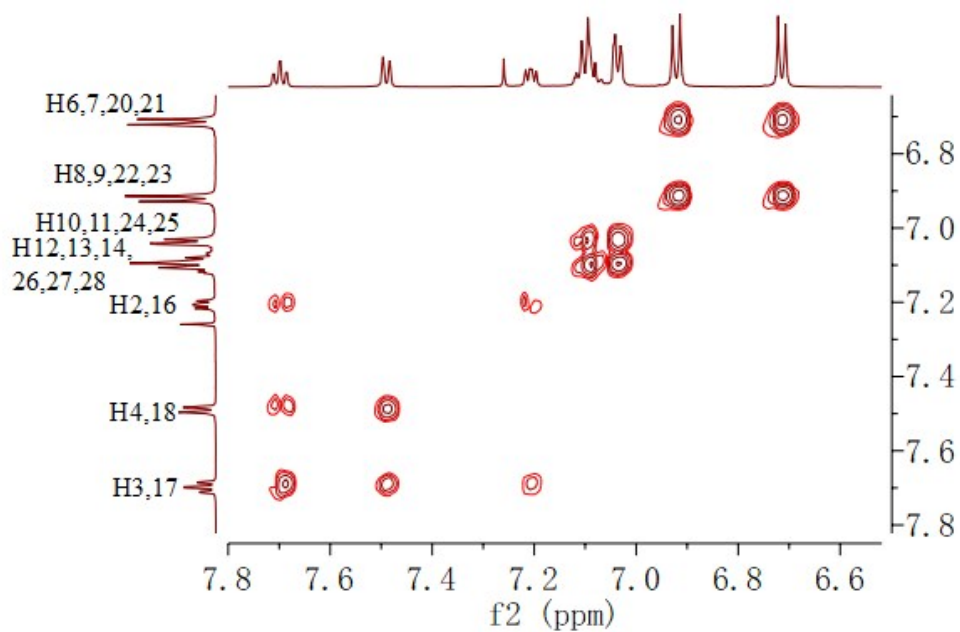

**Fig. S48** COSY-NMR of TPE-2by-1-E (enlarged).

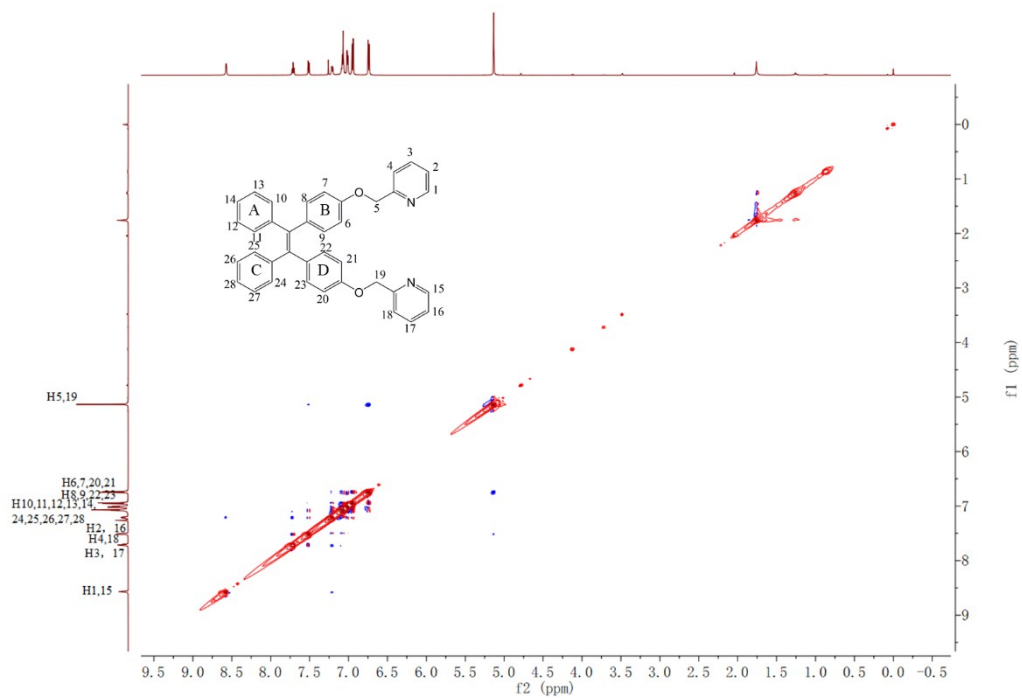

**Fig. S49** NOESY-NMR of TPE-2by-1-Z (full).

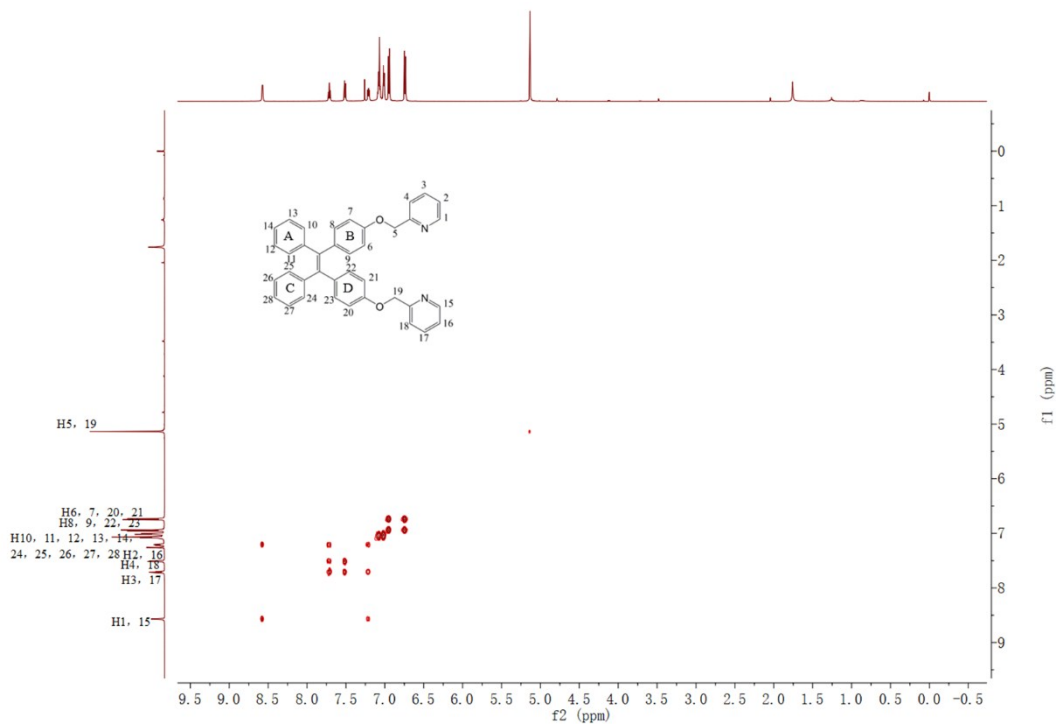

**Fig. S50** COSY-NMR of TPE-2by-1-Z (full).



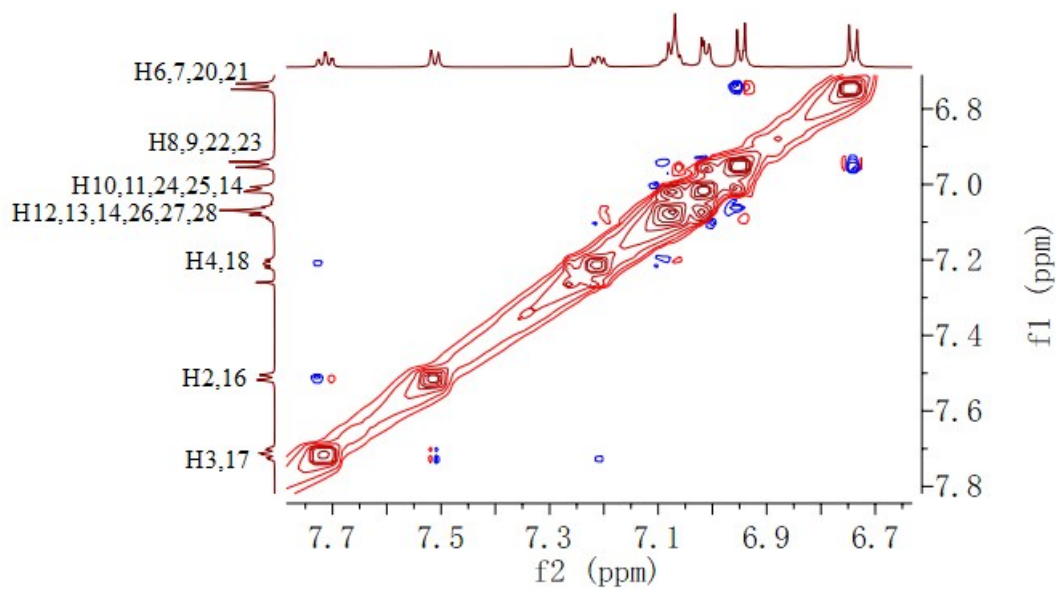

Fig. S51 NOESY-NMR of TPE-2by-1-Z (enlarged).

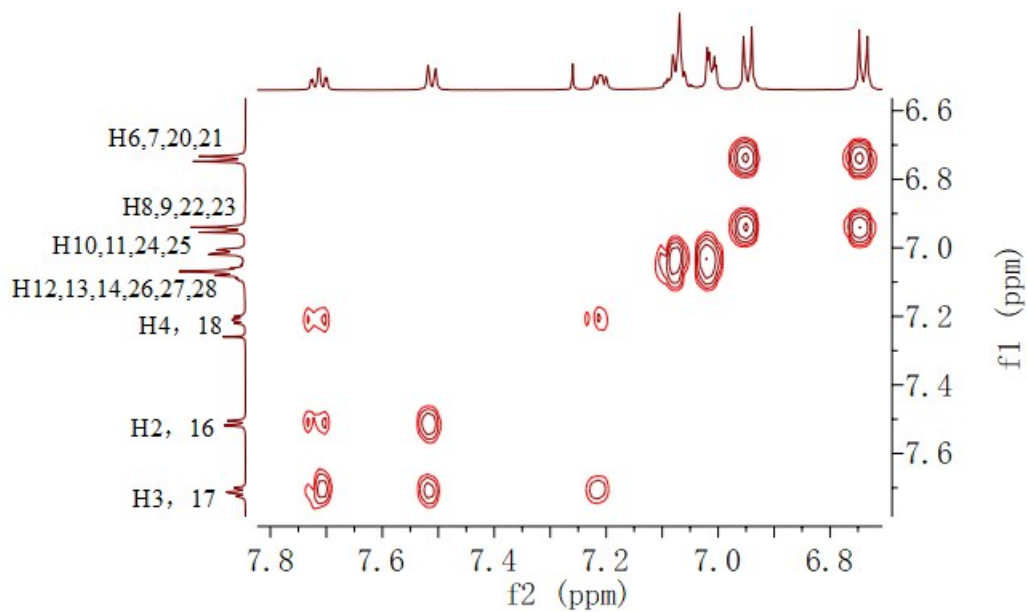

Fig. S52 COSY-NMR of TPE-2by-1-Z (enlarged).

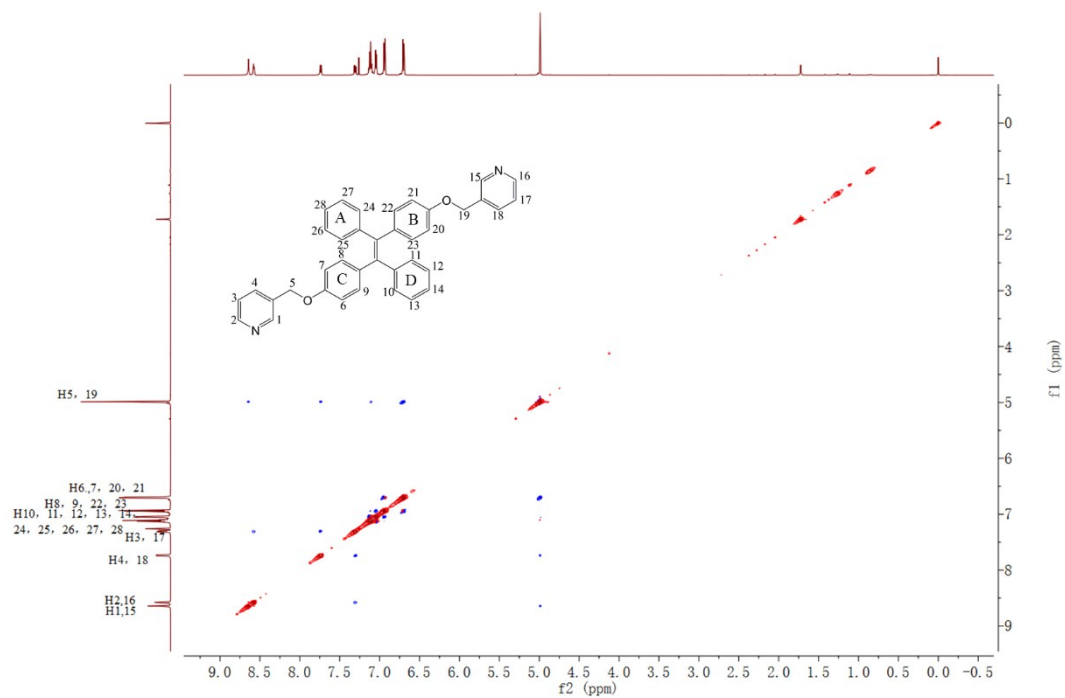

**Fig. S53** NOESY-NMR of TPE-2by-2-E (full).

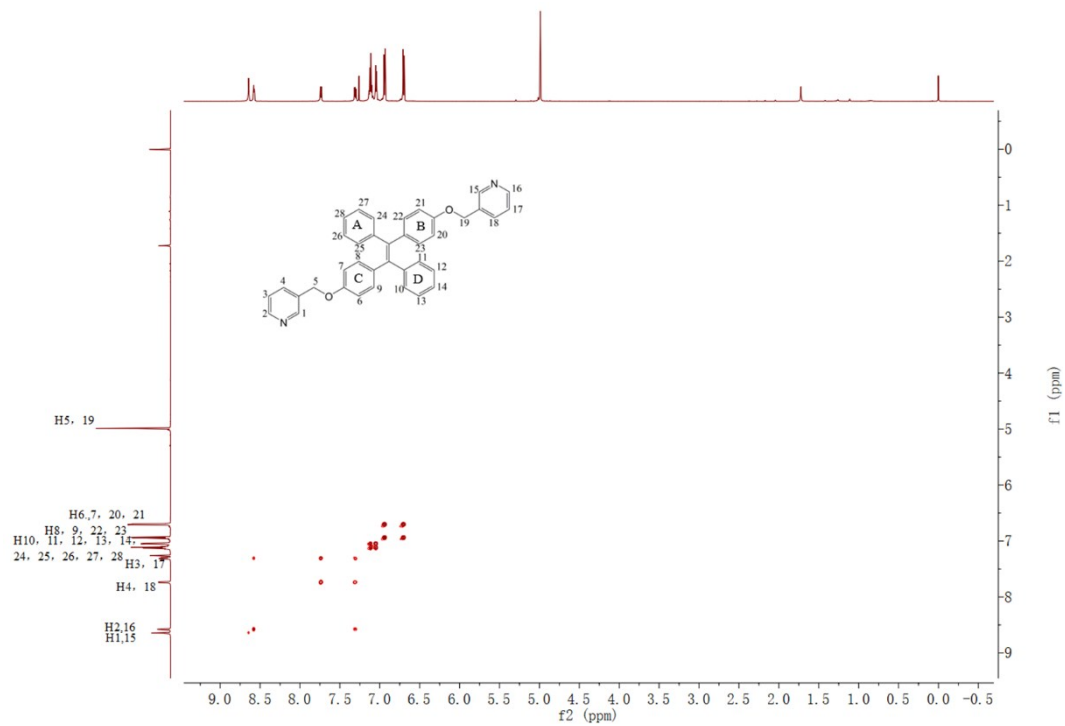

**Fig. S54** COSY-NMR of TPE-2by-2-E (full).

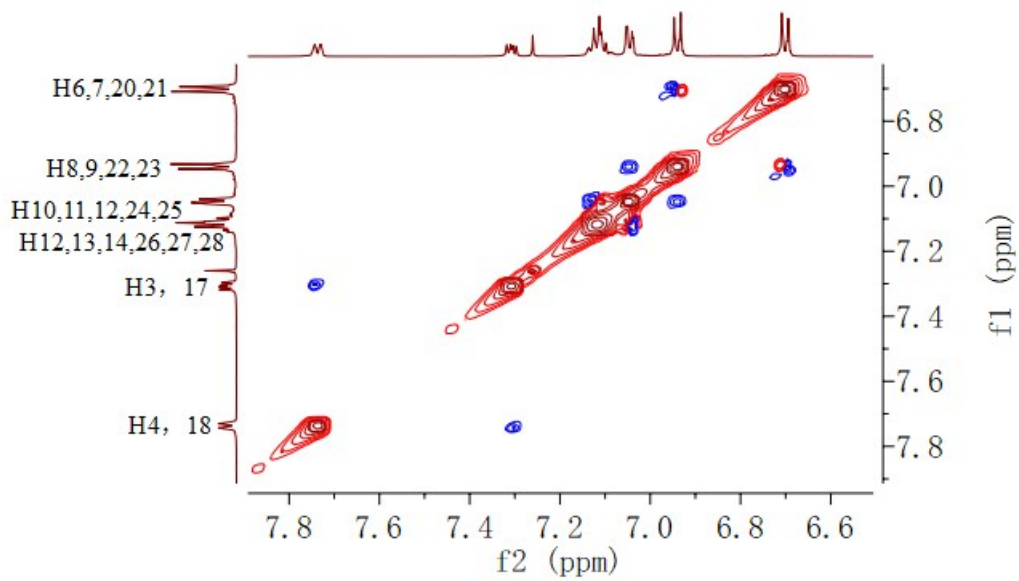

Fig. S55 NOESY-NMR of TPE-2by-2-E (enlarged).

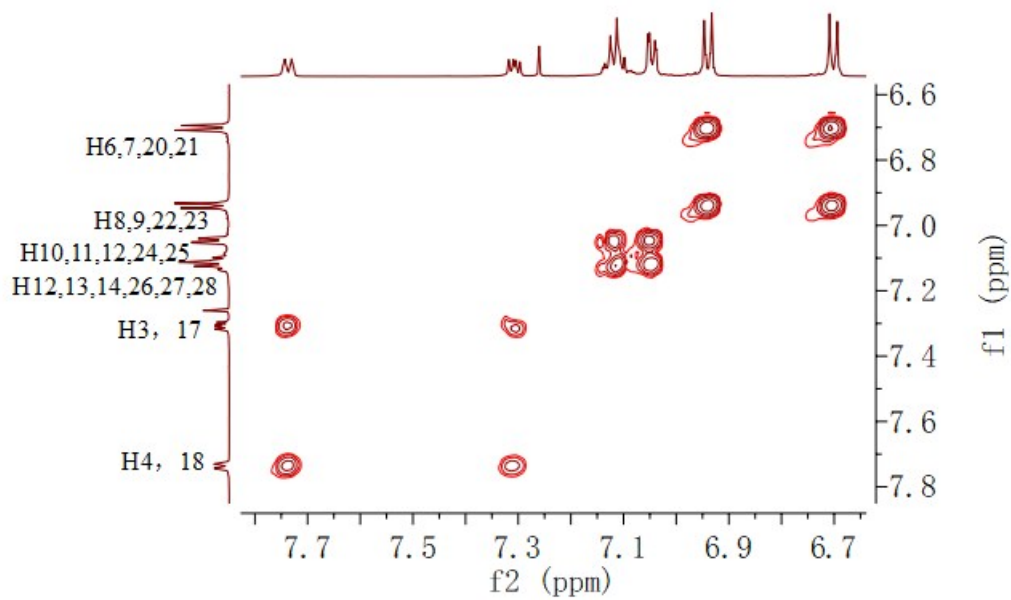

Fig. S56 COSY-NMR of TPE-2by-2-E (enlarged).

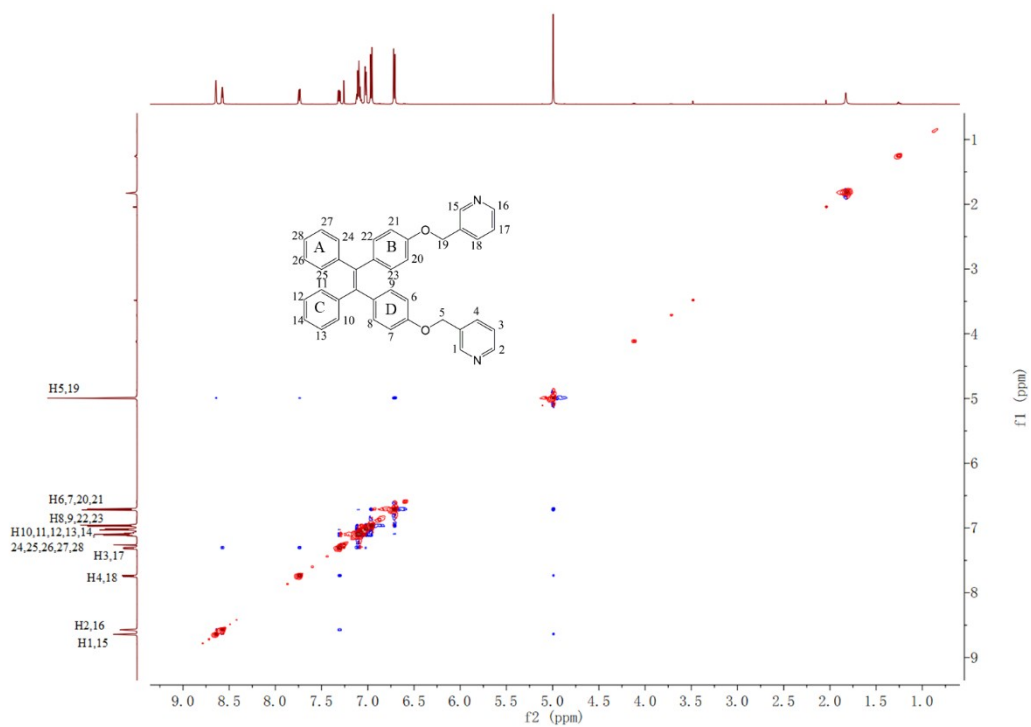

**Fig. S57** NOESY-NMR of TPE-2by-2-Z (full).

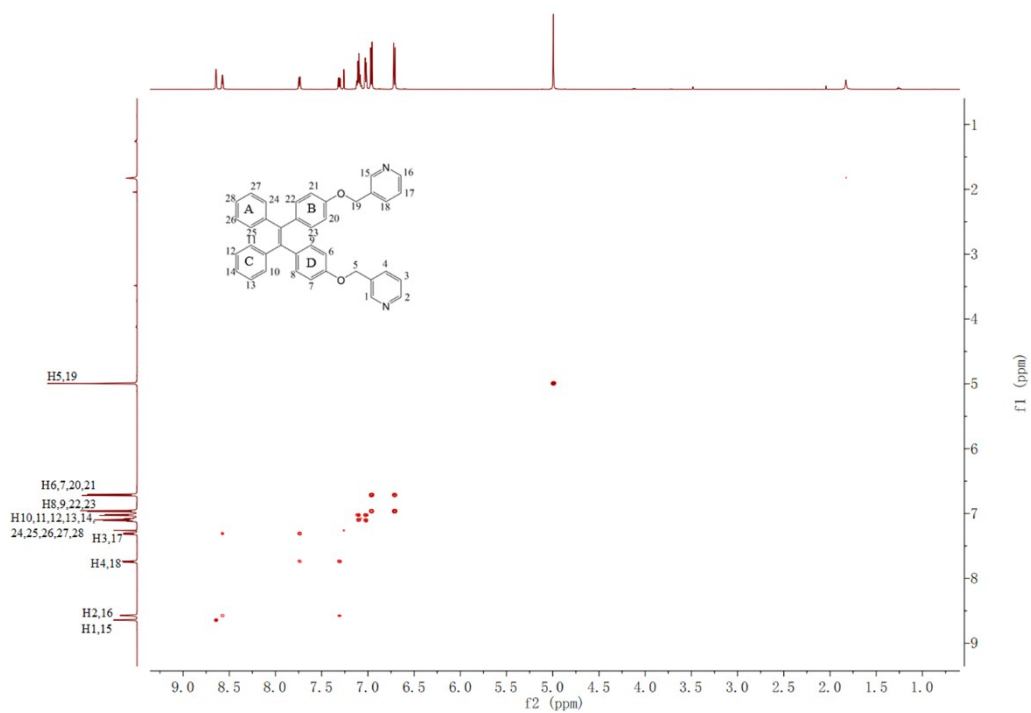

**Fig. S58** COSY-NMR of TPE-2by-2-Z (full).

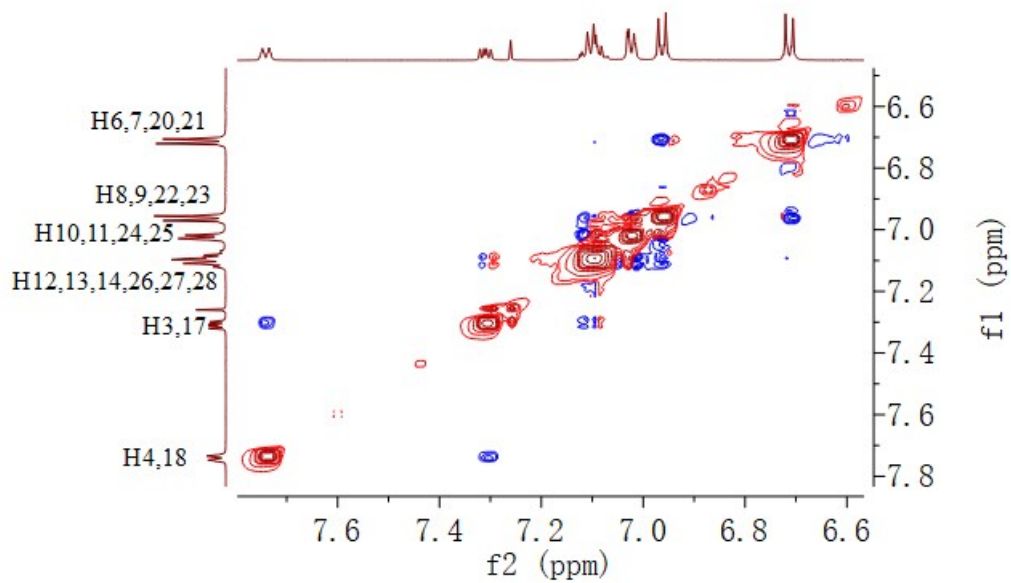

**Fig. S59** NOESY-NMR of TPE-2by-2-Z (enlarged).

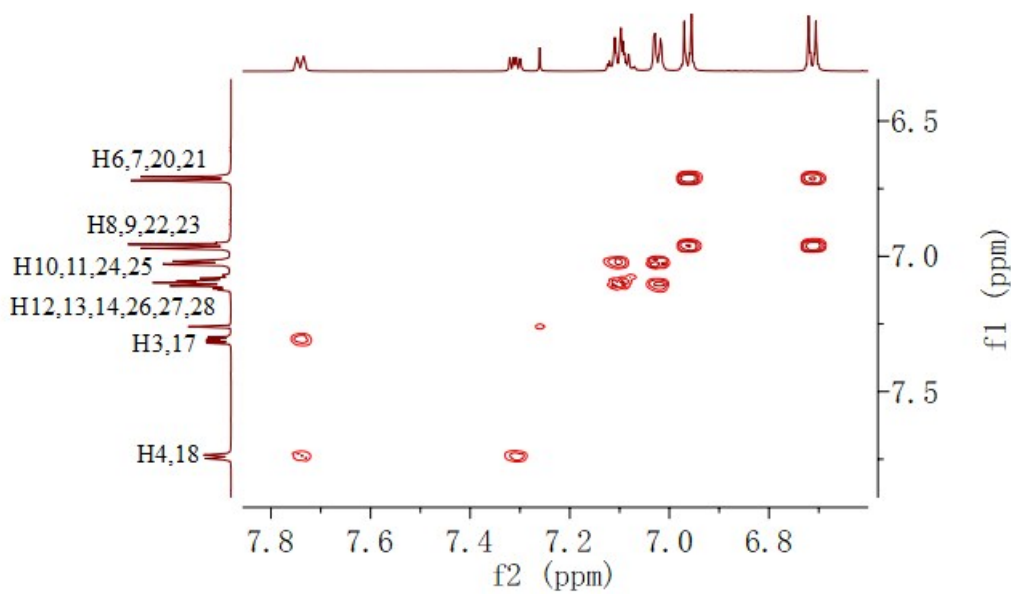

**Fig. S60** COSY-NMR of TPE-2by-2-Z (enlarged).

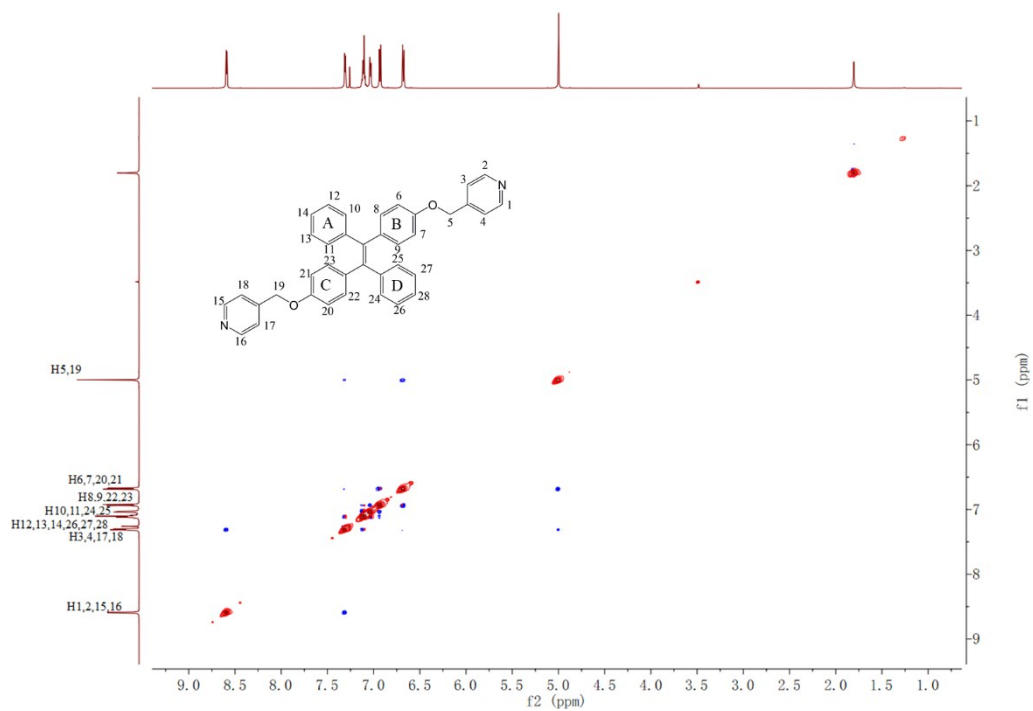

**Fig. S61** NOESY-NMR of TPE-2by-3-E(full).

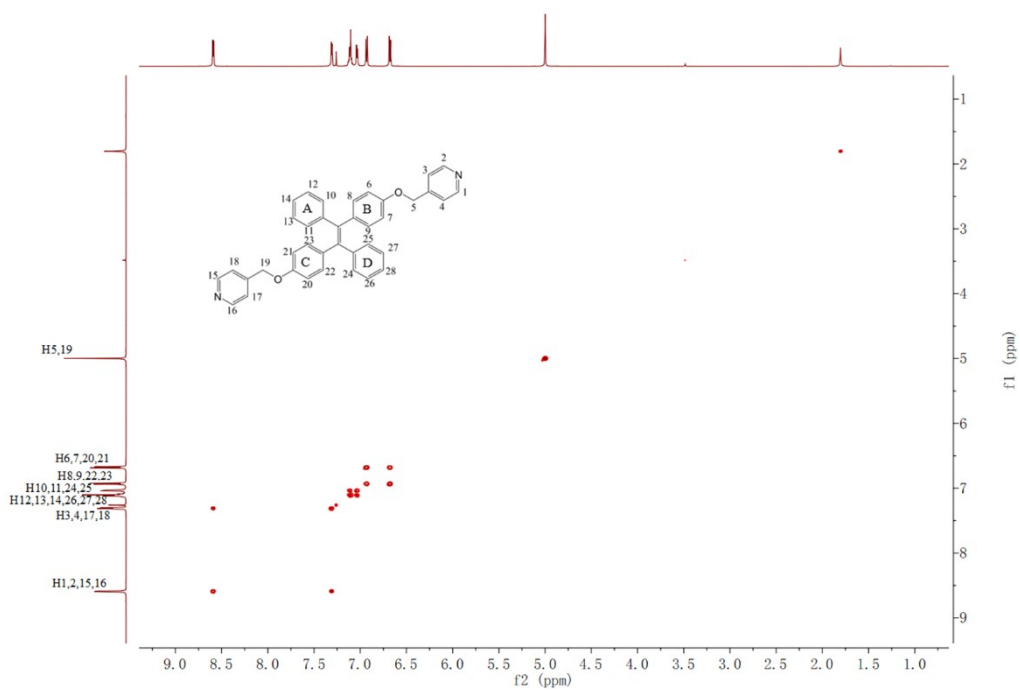

**Fig. S62** COSY-NMR of TPE-2by-3-E(full).

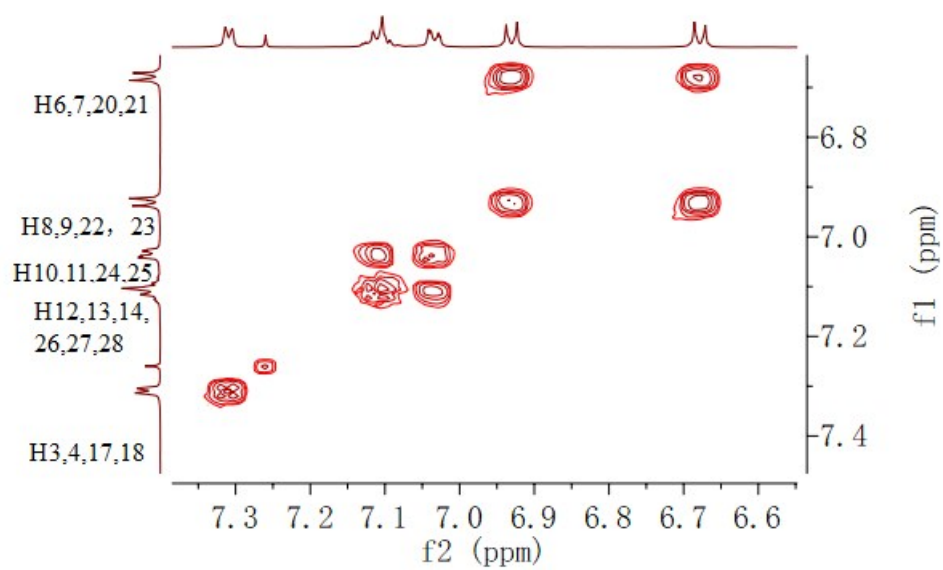

**Fig. S63** COSY-NMR of TPE-2by-3-E(enlarged).

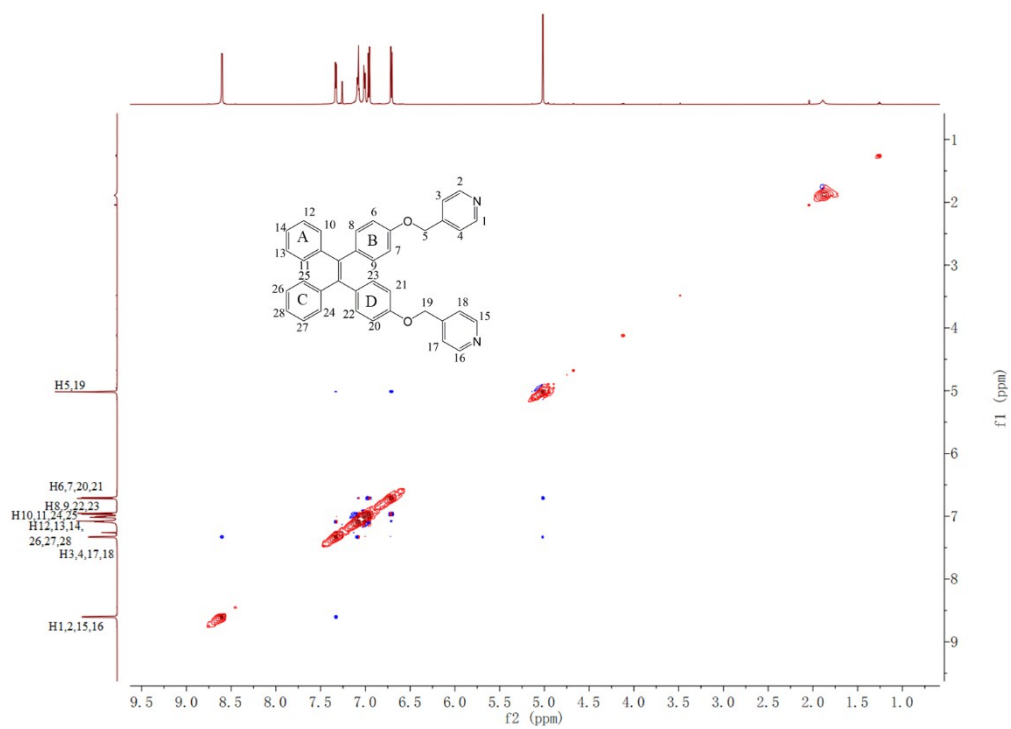

**Fig. S64** NOESY-NMR of TPE-2by-3-Z(full).

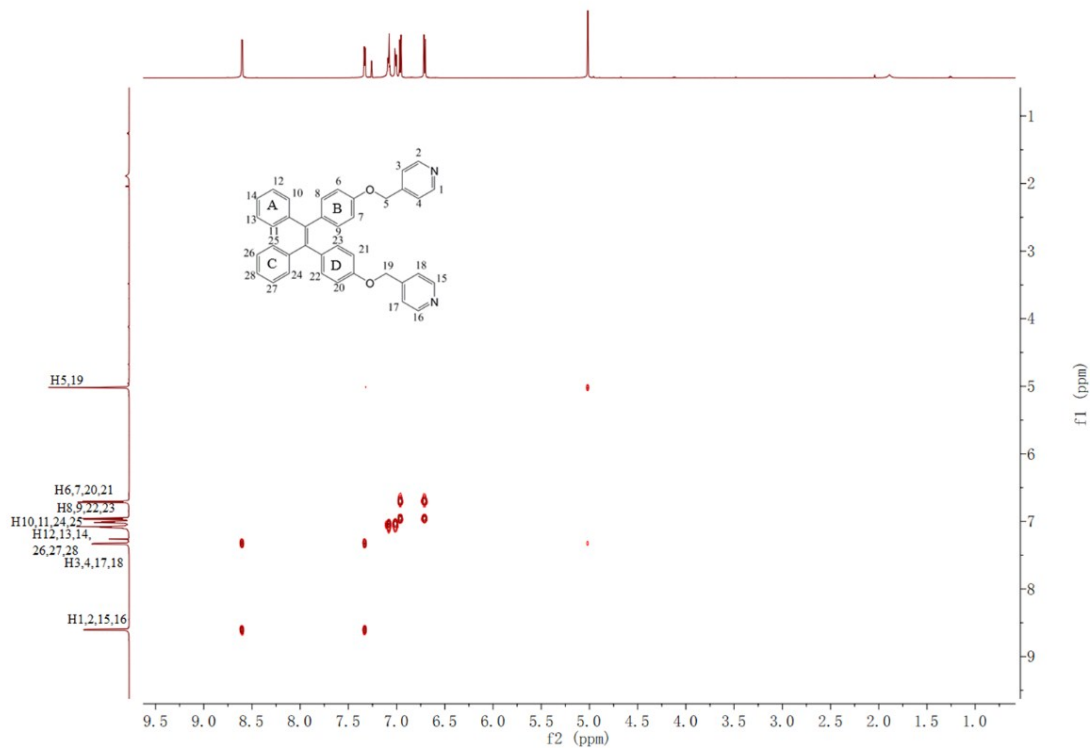

**Fig. S65** COSY-NMR of TPE-2by-3-Z(full).

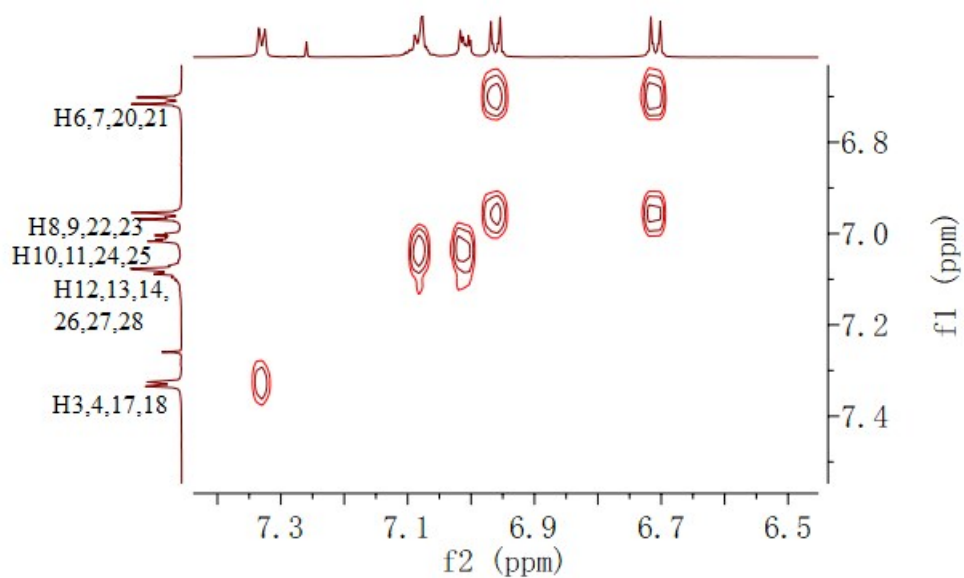

**Fig. S66** COSY-NMR of TPE-2by-3-Z(enlarged).



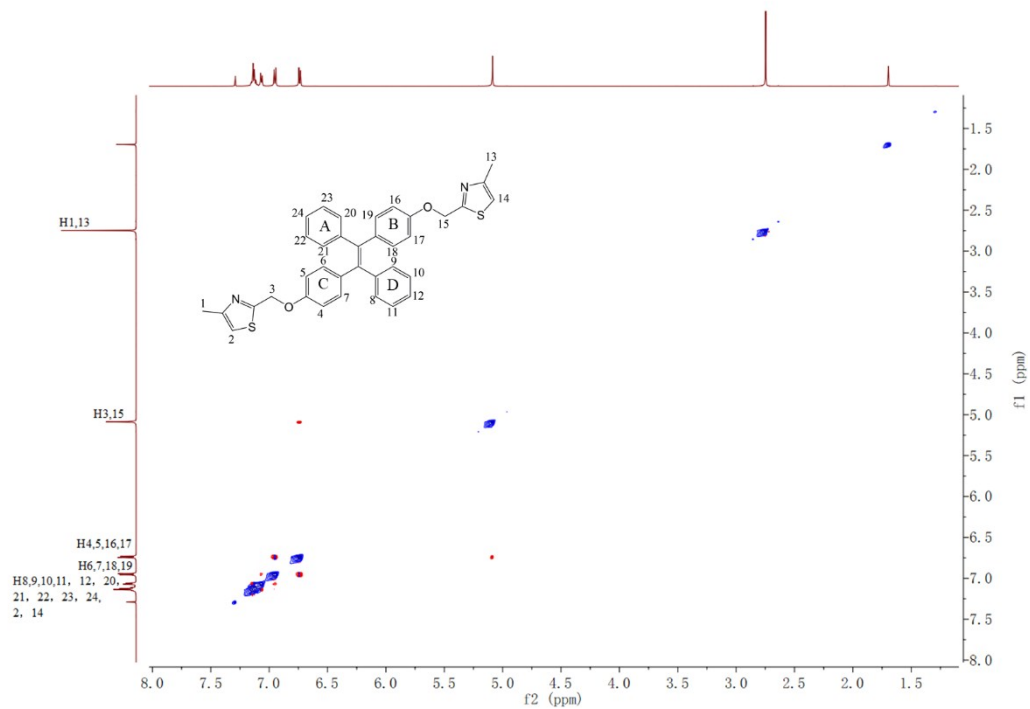

**Fig. S67** NOESY-NMR of TPE-2TZ-E(full).

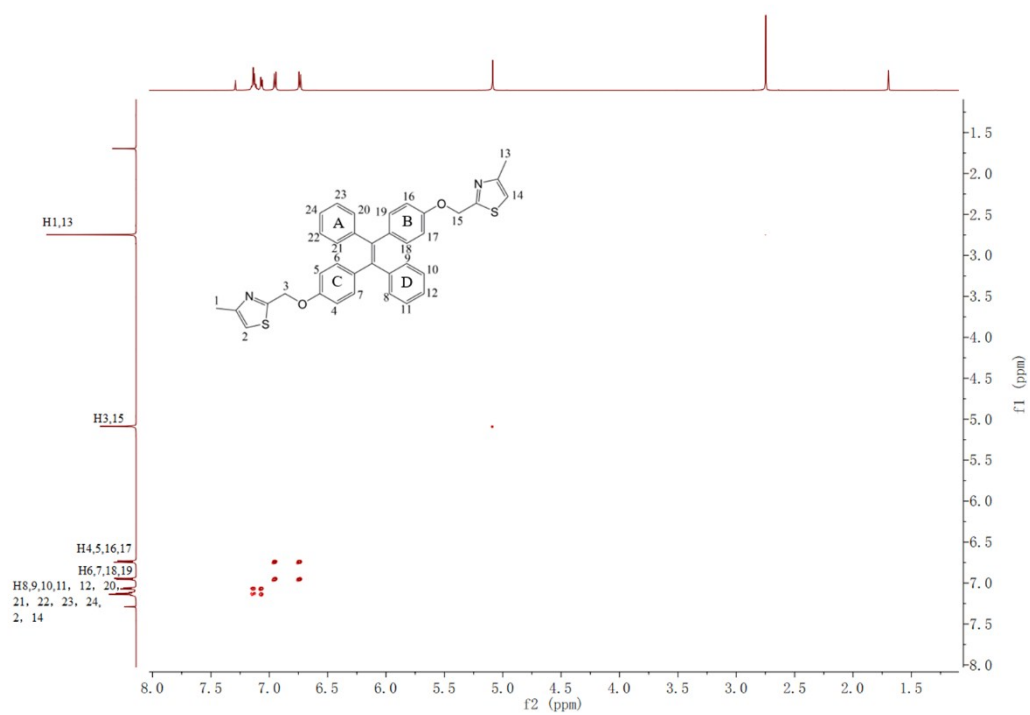

**Fig. S68** COSY-NMR of TPE-2TZ-E(full).

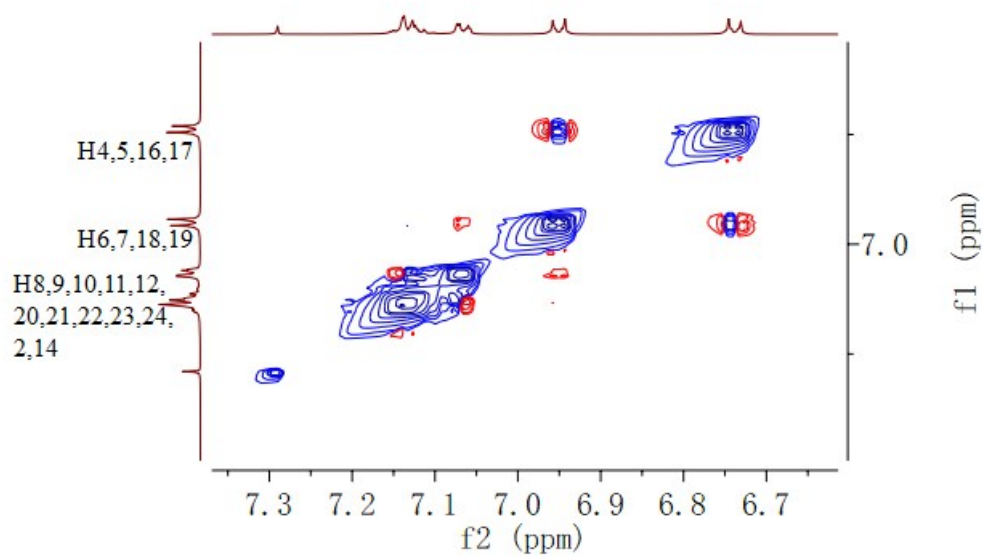

**Fig. S69** NOESY-NMR of TPE-2TZ-E(enlarged).

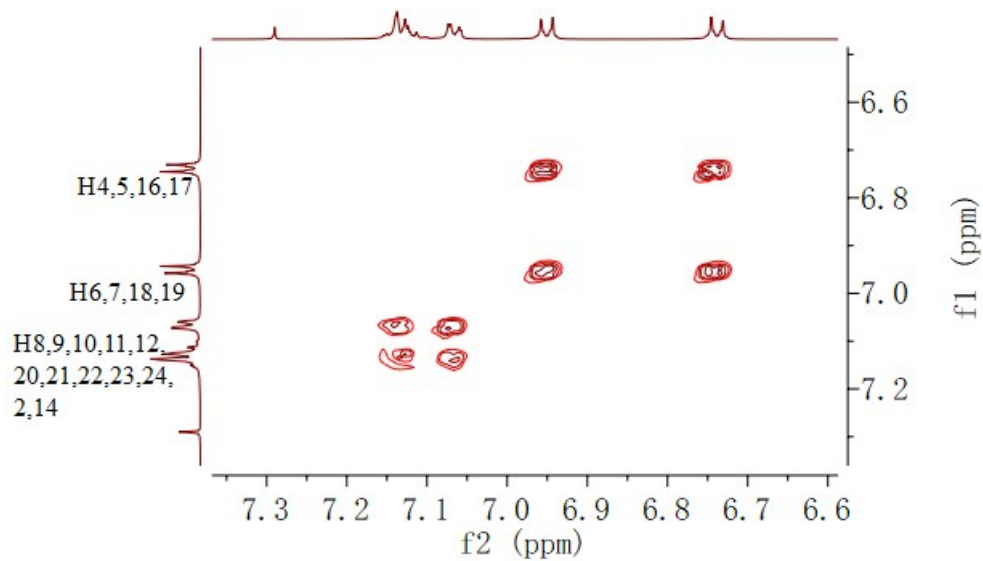

**Fig. S70** COSY-NMR of TPE-2TZ-E(enlarged).

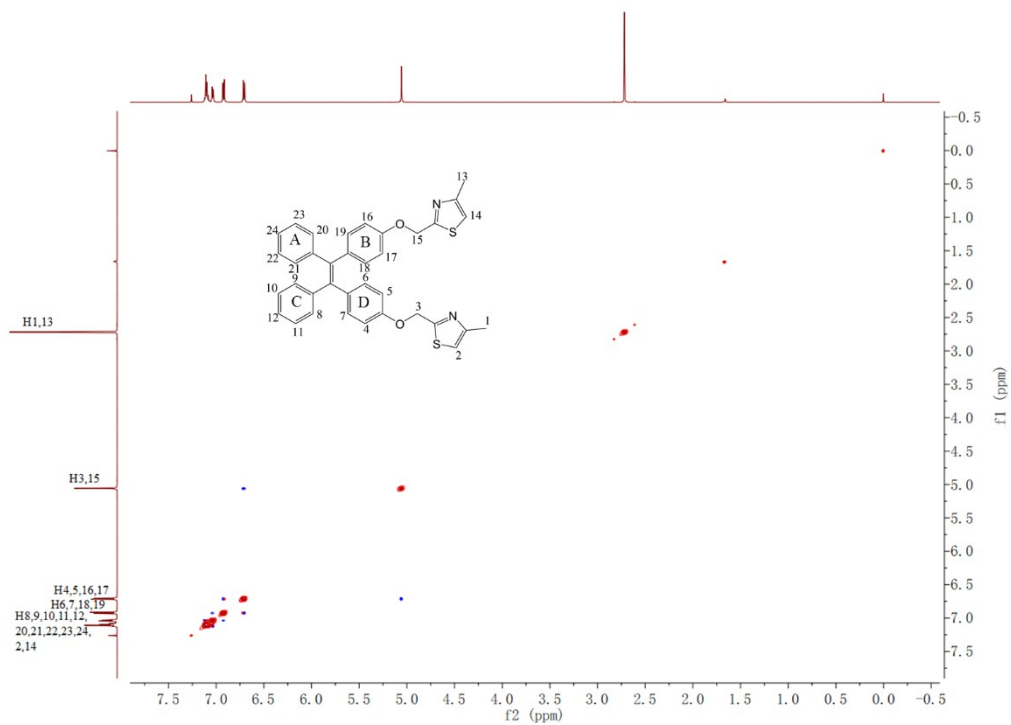

**Fig. S71** NOESY-NMR of TPE-2TZ-Z(full).

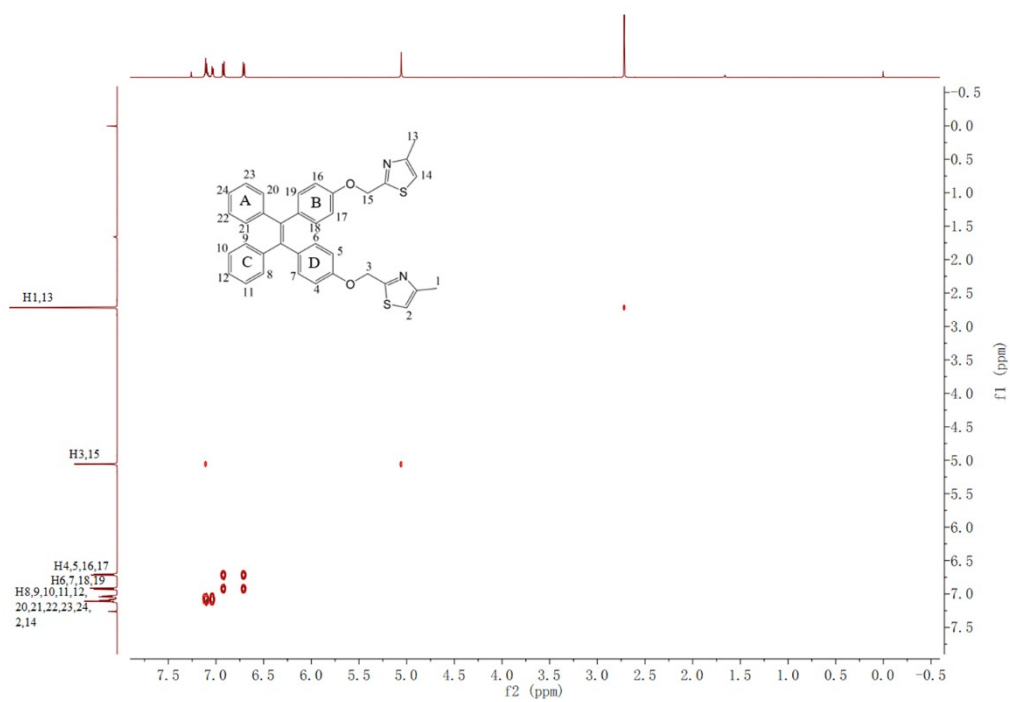

**Fig. S72** COSY-NMR of TPE-2TZ-Z(full).

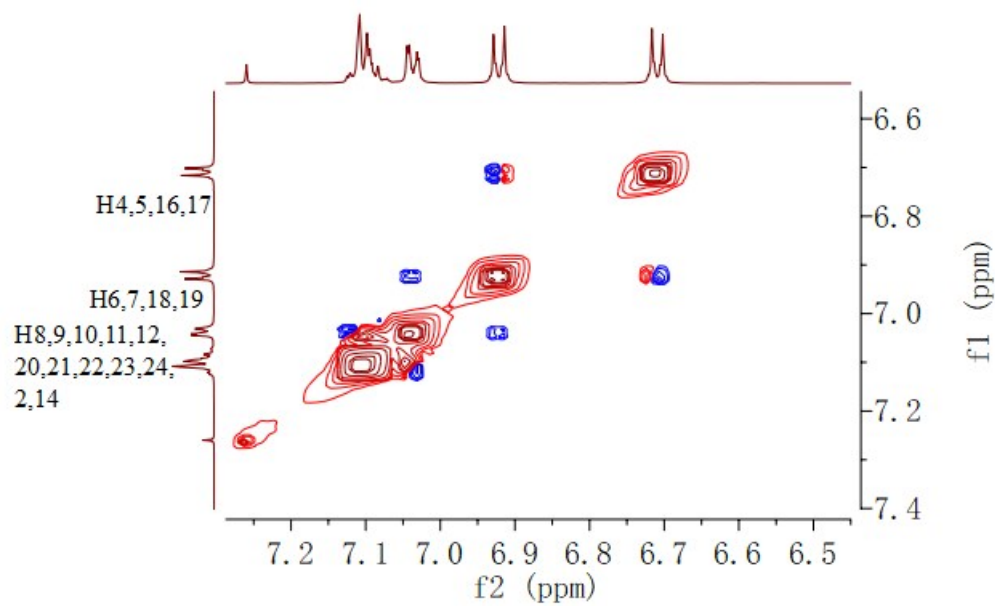

**Fig. S73** NOESY-NMR of TPE-2TZ-Z(enlarged).

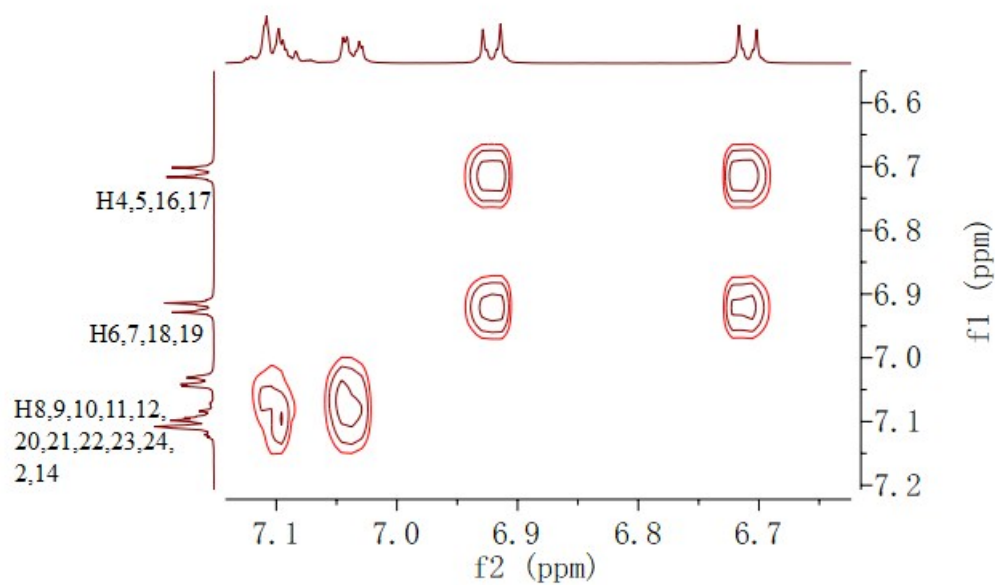

**Fig. S74** COSY-NMR of TPE-2TZ-Z(enlarged).

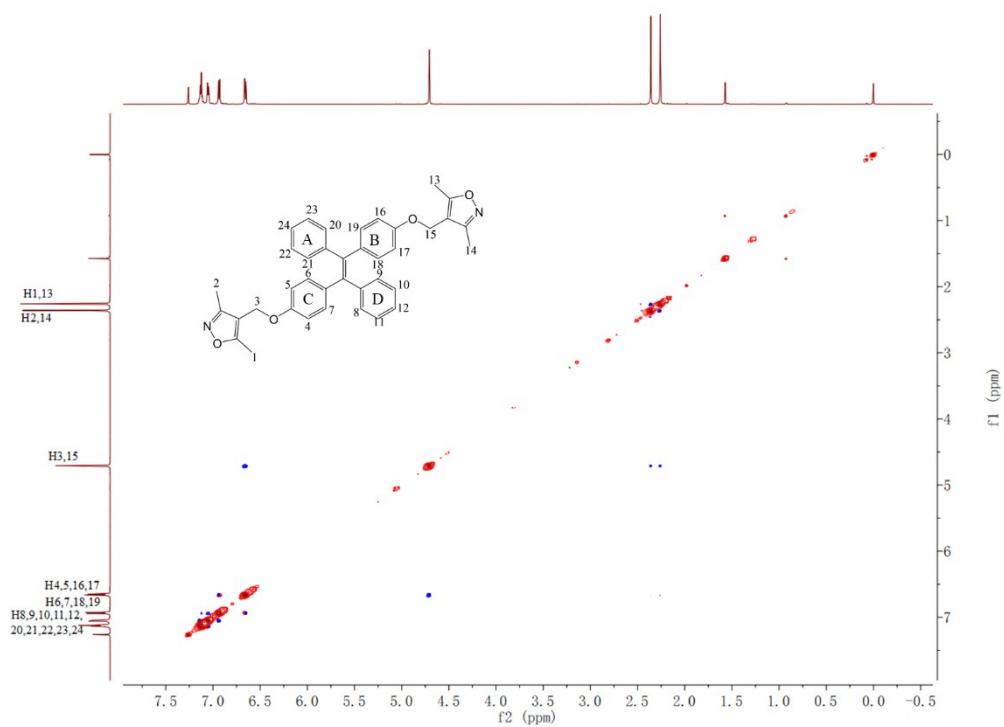

**Fig. S75** NOESY-NMR of TPE-2EZ-E(full).

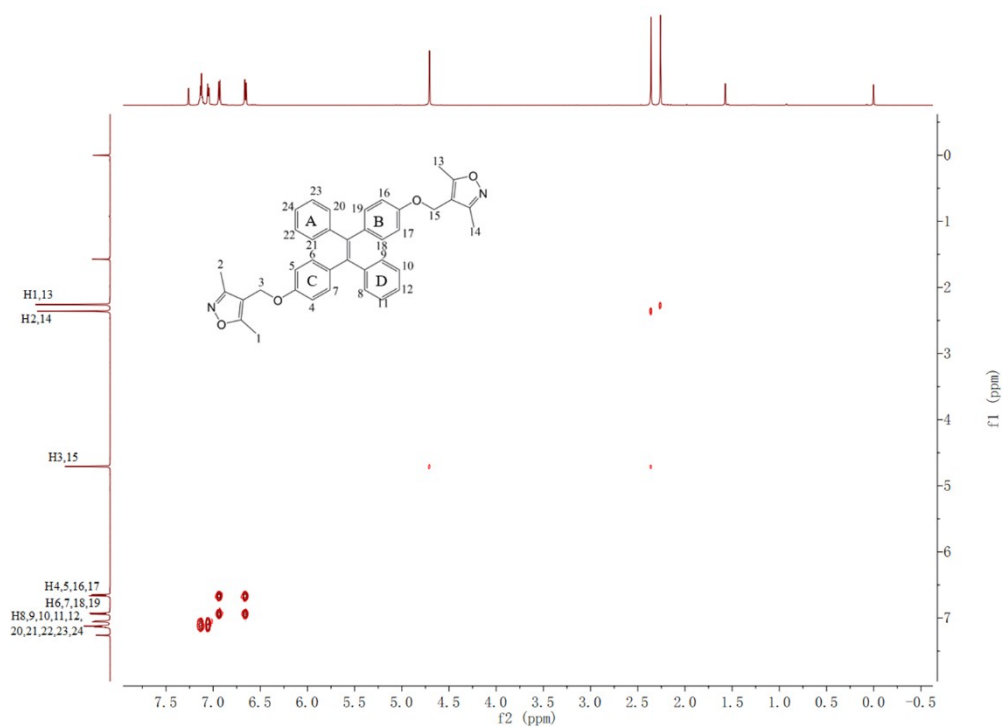

**Fig. S76** COSY-NMR of TPE-2EZ-E(full).

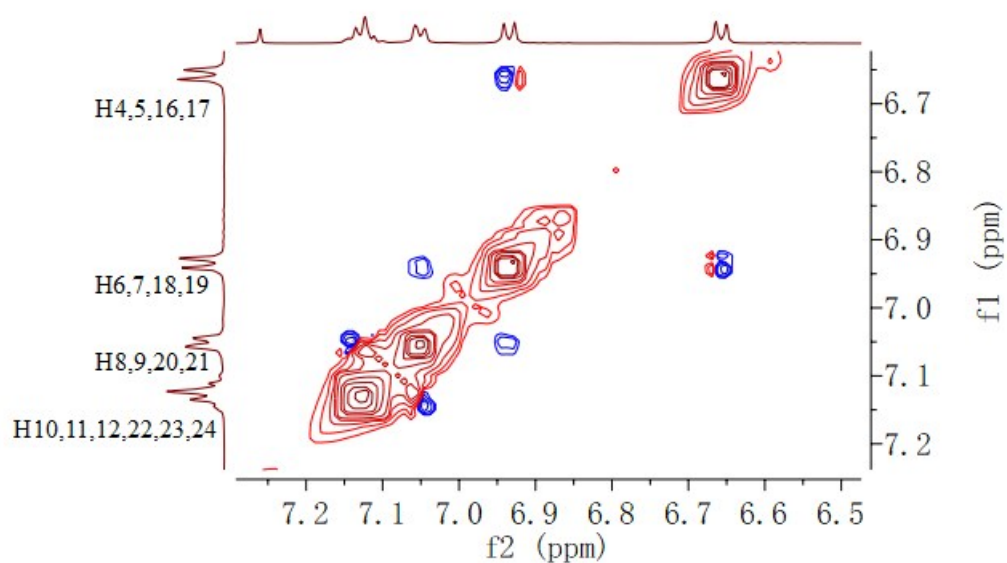

**Fig. S77** NOESY-NMR of TPE-2EZ-E(enlarged).

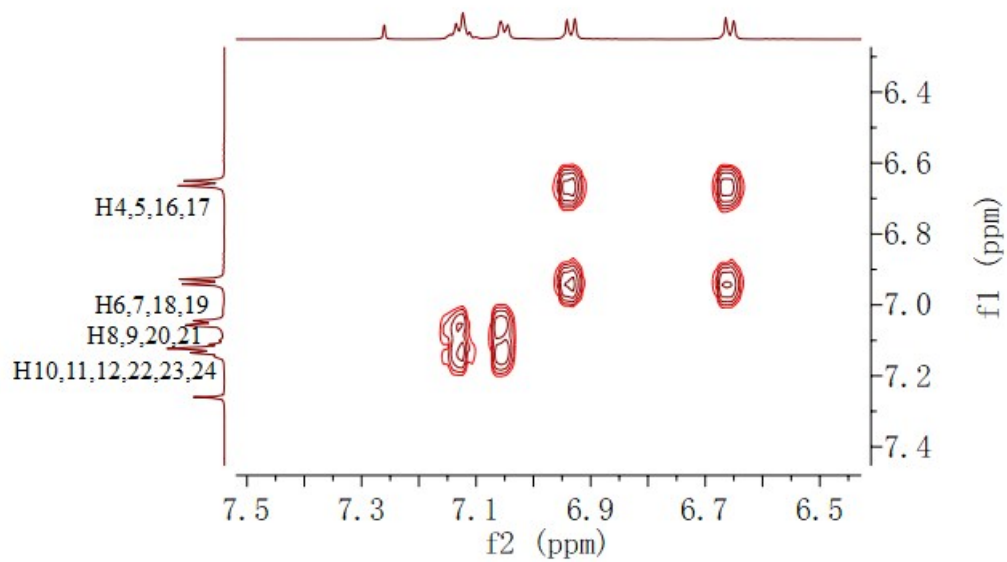

**Fig. S78** COSY-NMR of TPE-2EZ-E(enlarged).

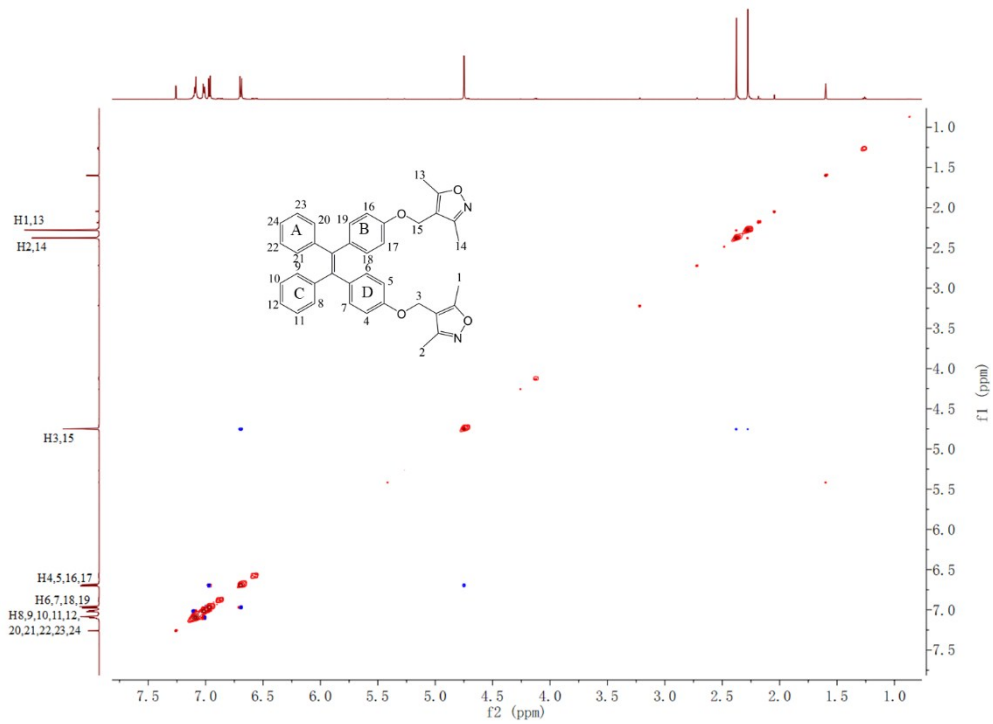

**Fig. S79** NOESY-NMR of TPE-2EZ-Z(full).

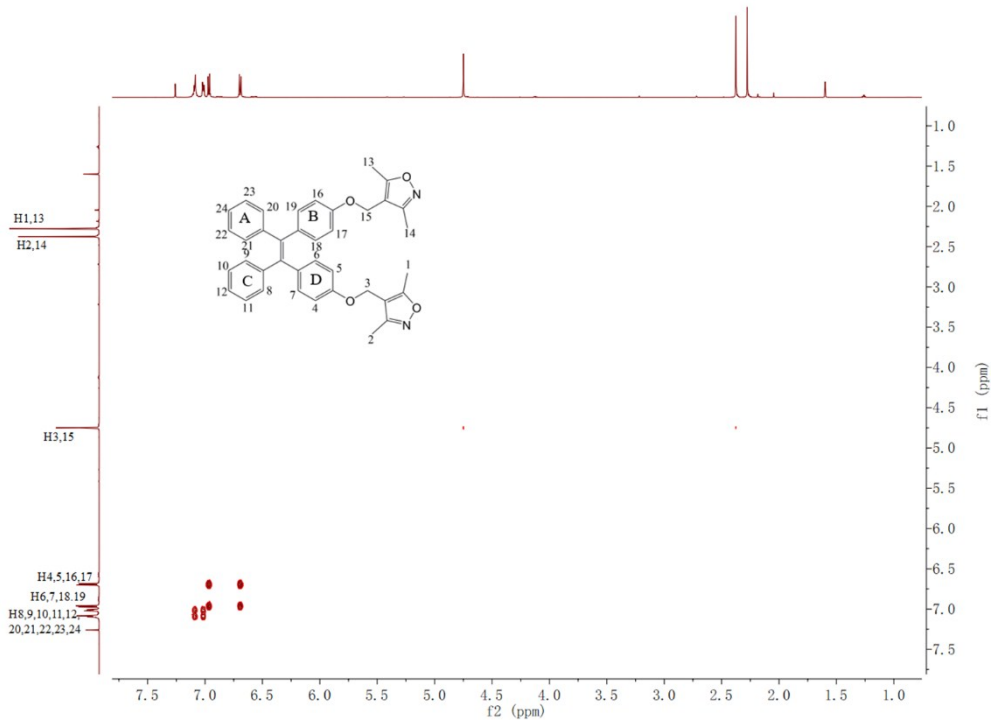

**Fig. S80** COSY-NMR of TPE-2EZ-Z(full).

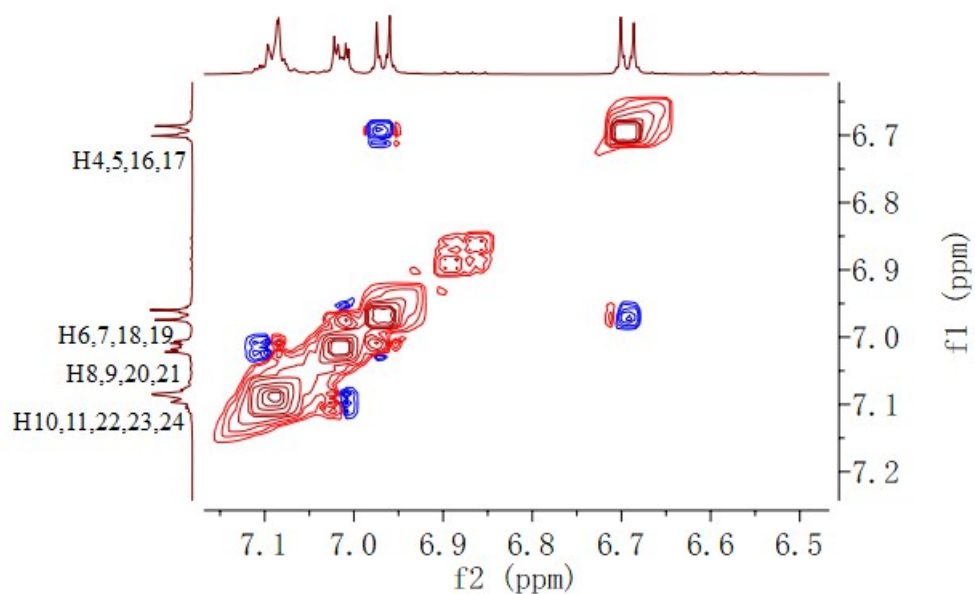

Fig. S81 NOESY-NMR of TPE-2EZ-Z(enlarged).

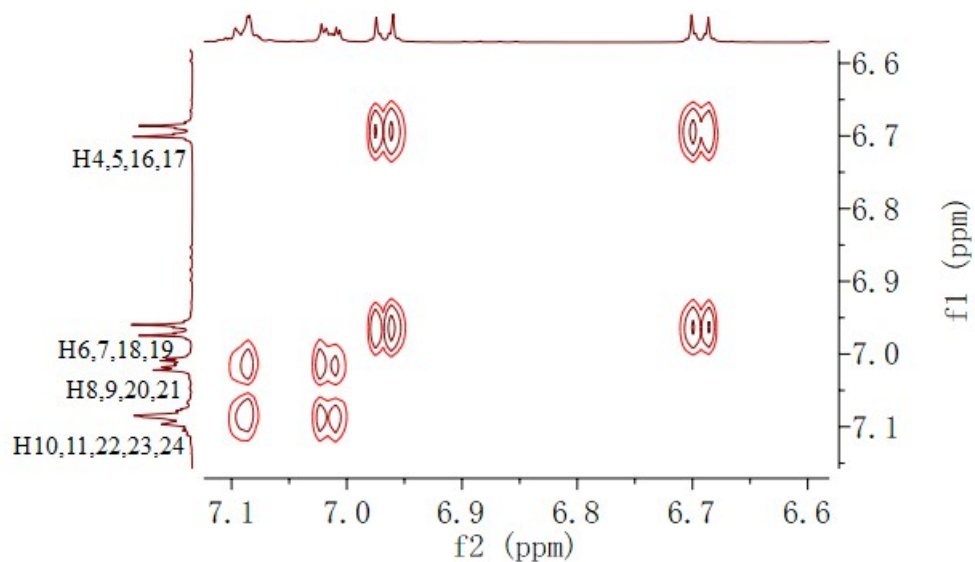

Fig. S82 COSY-NMR of TPE-2EZ-Z(enlarged).



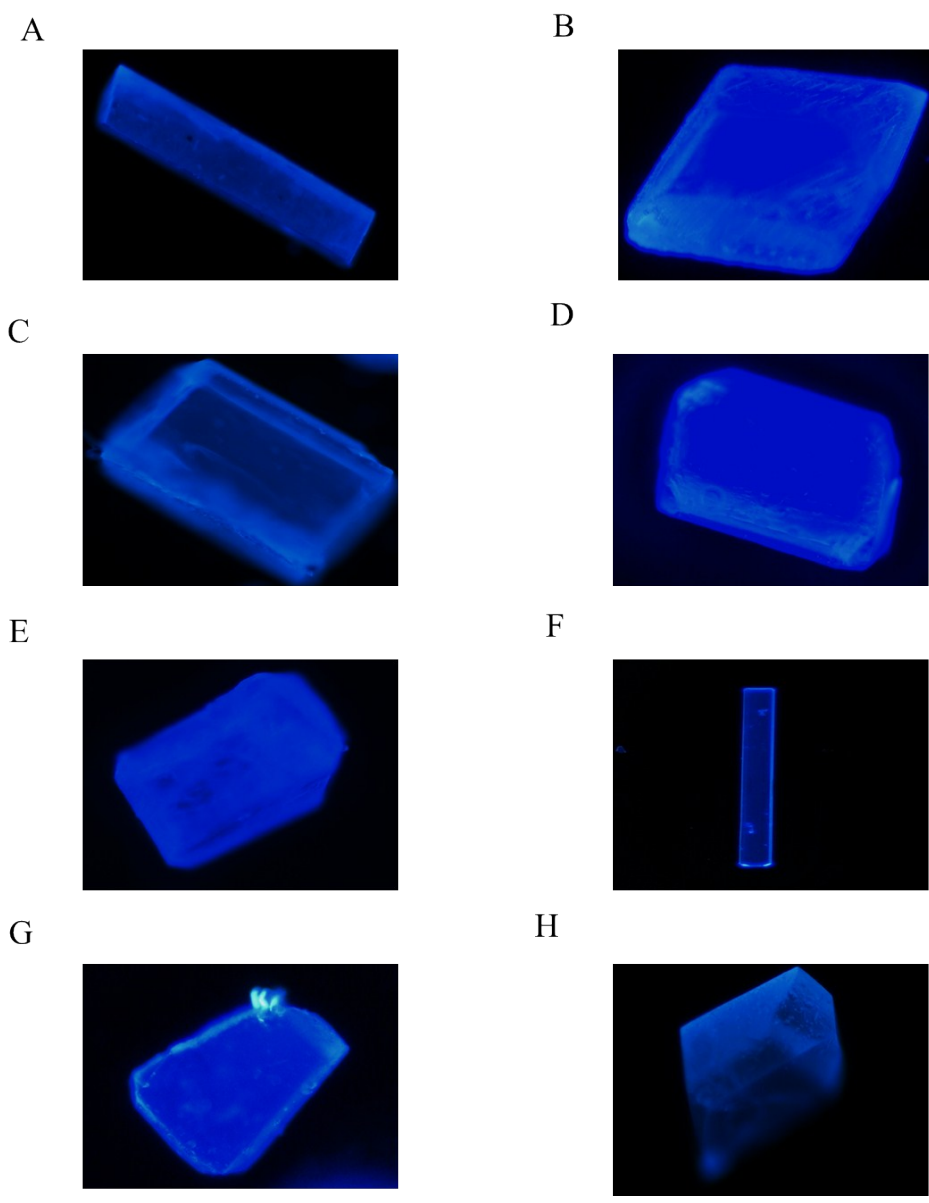

**Fig. S83** Single crystal fluorescence pictures of TPE-2by-1-E (A) ,TPE-2by-1-Z (B), TPE-2by-2-E (C) ,TPE-2by-2-Z (D), TPE-2TZ-E (E) ,TPE-2TZ-Z (F), TPE-2EZ-E (G) , TPE-2EZ-Z (H) under the fluorescent inverted microscope.

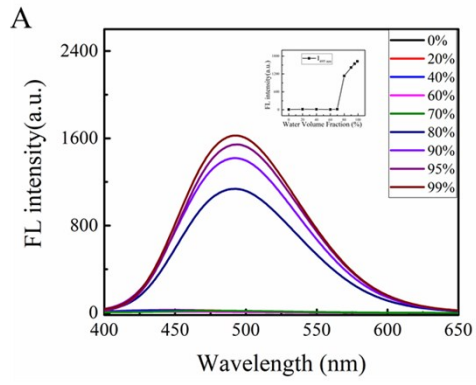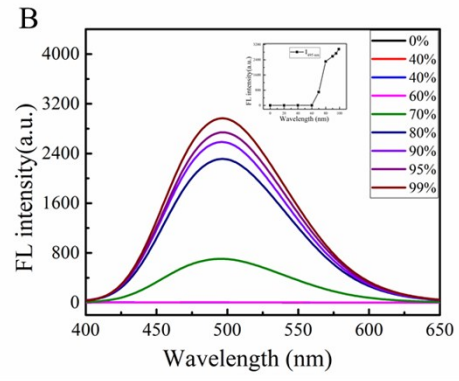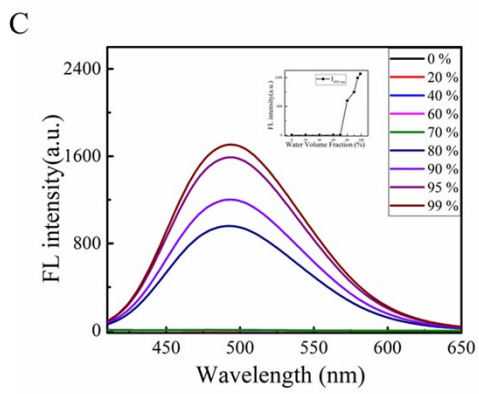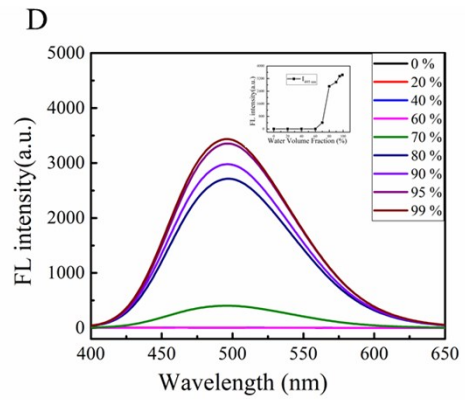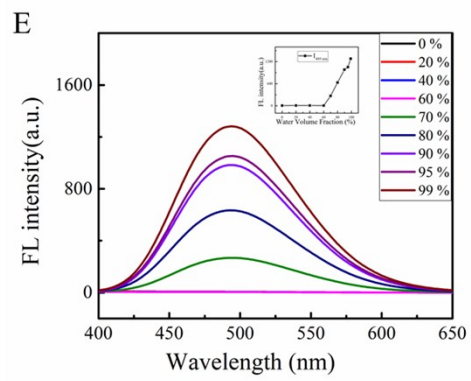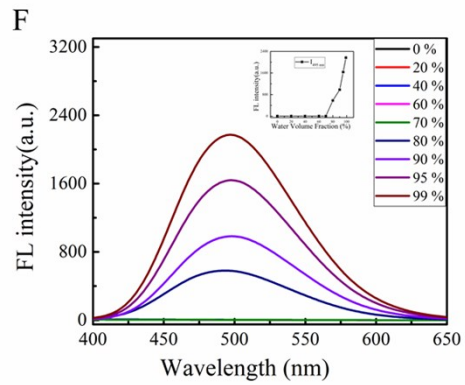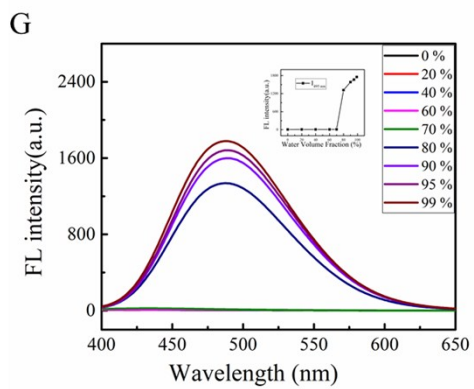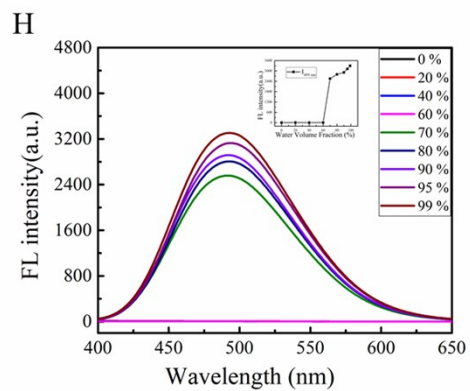

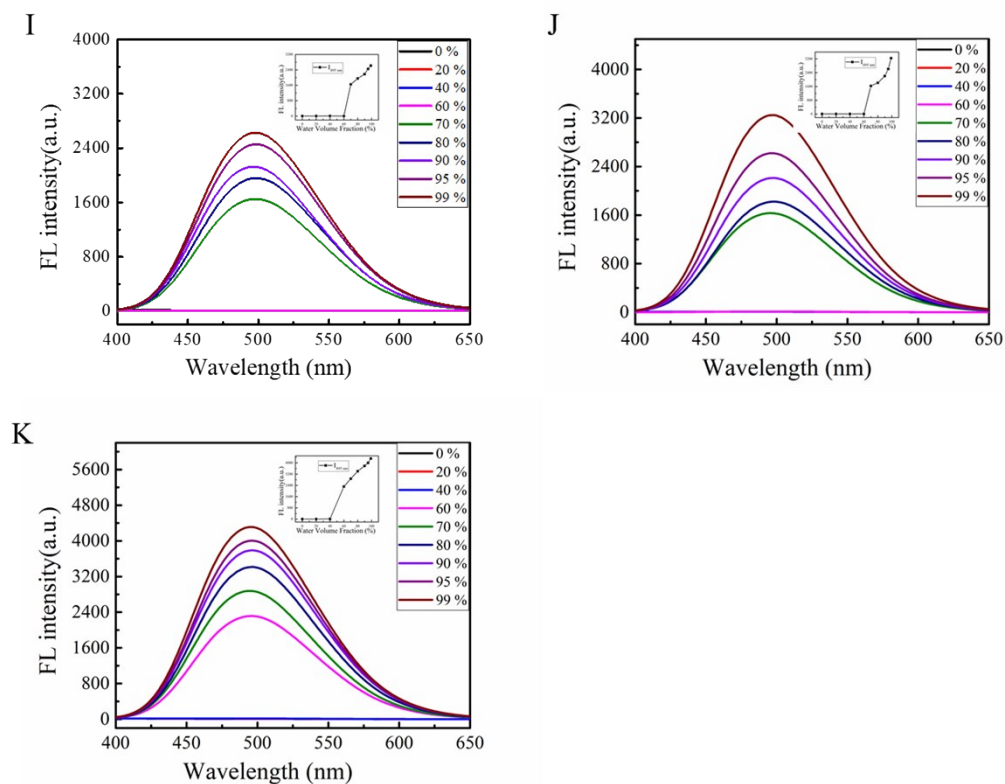

**Fig. S84** Fluorescent spectra of TPE-2by-1-E (A) ,TPE-2by-1-Z (B), TPE-2by-2-E (C) ,TPE-2by-2-Z (D), TPE-2TZ-E (E) ,TPE-2TZ-Z (F), TPE-2EZ-E (G) , TPE-2EZ-Z (H), TPE-2B(I),TPE-2T(J) and TPE-2N(K). ( $1 \times 10^{-5}$  M,  $\lambda_{\text{ex}} = 340$  nm) in DMF and water mixtures with different water fractions (inset: and plots of fluorescence intensity versus water fractions).

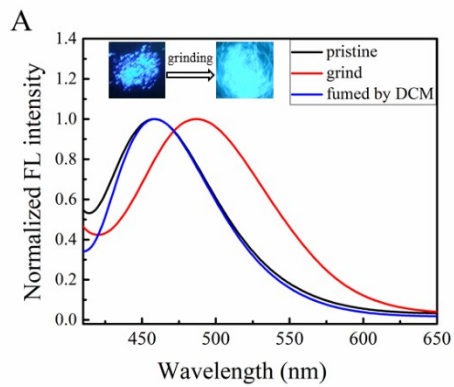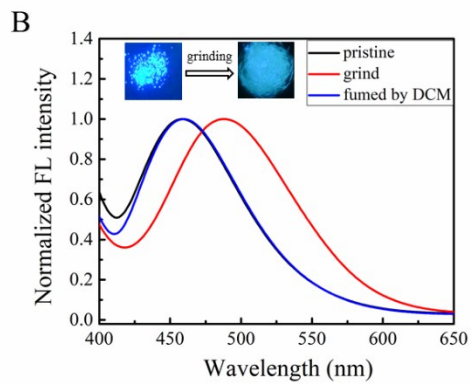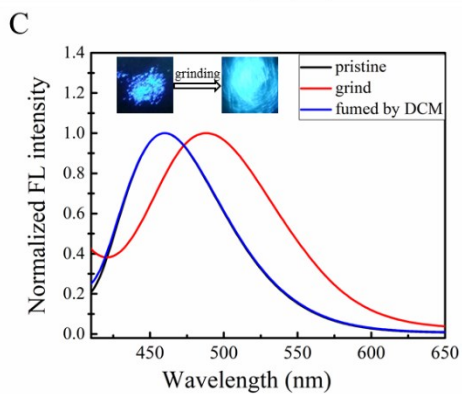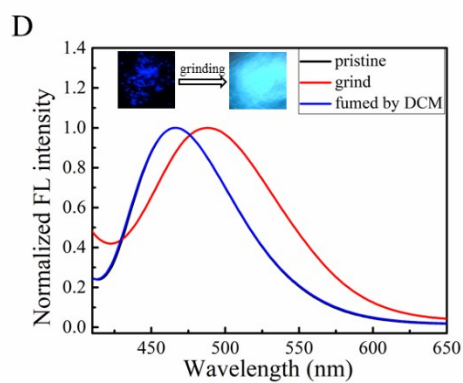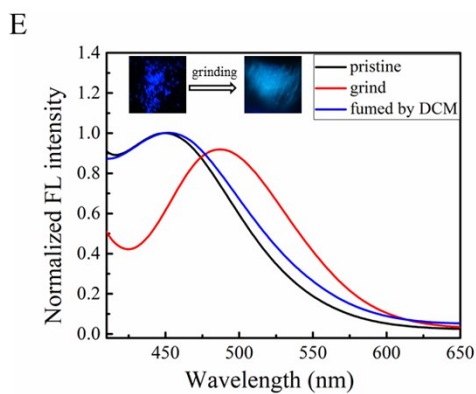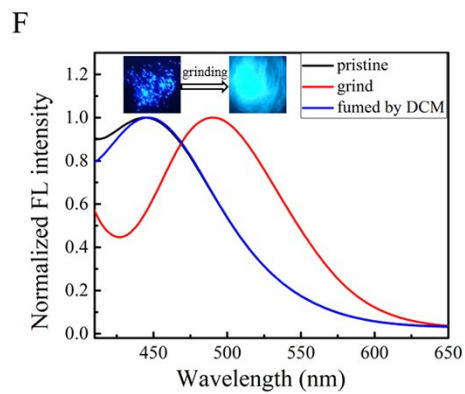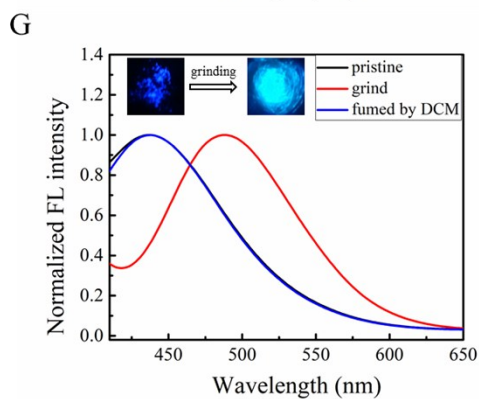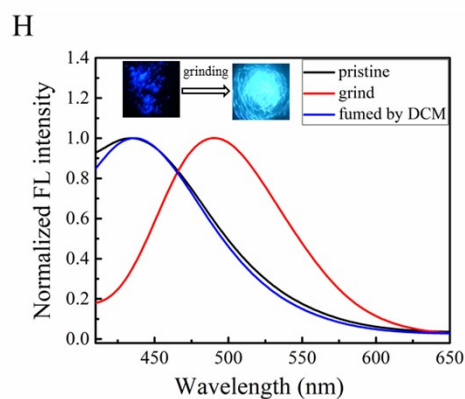

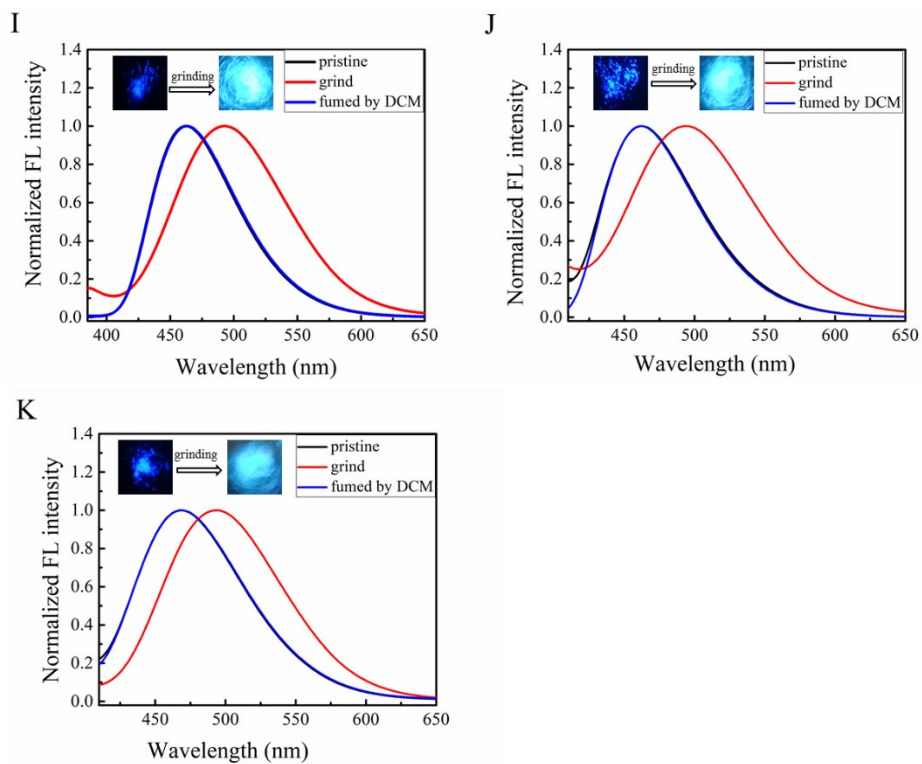

**Fig. S85** Fluorescent spectra of TPE-2by-1-E (A) ,TPE-2by-1-Z (B), TPE-2by-2-E (C) ,TPE-2by-2-Z (D), TPE-2TZ-E (E) ,TPE-2TZ-Z (F), TPE-2EZ-E (G) , TPE-2EZ-Z (H), TPE-2B(I),TPE-2T(J) and TPE-2N(K) (inset: fluorescent images in pristine and grinding all).

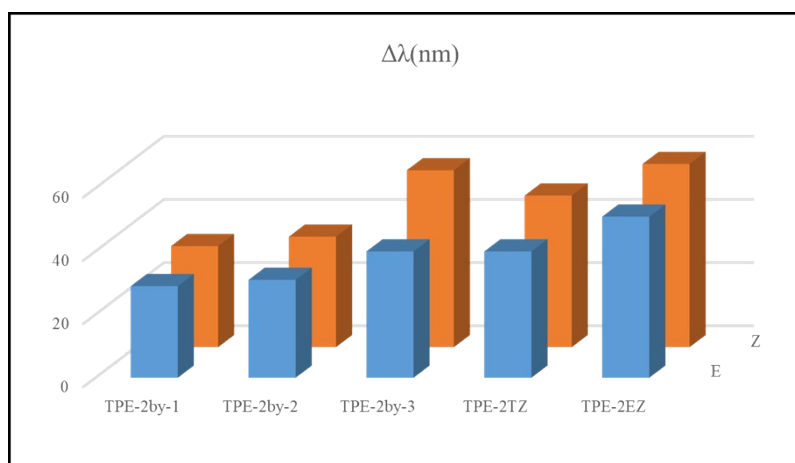

**Fig. S86** The red-shifted wavelength histogram of all Z/E isomers.

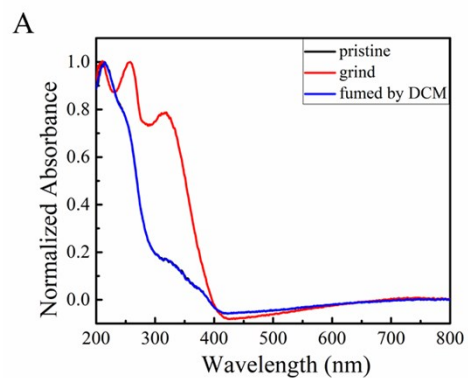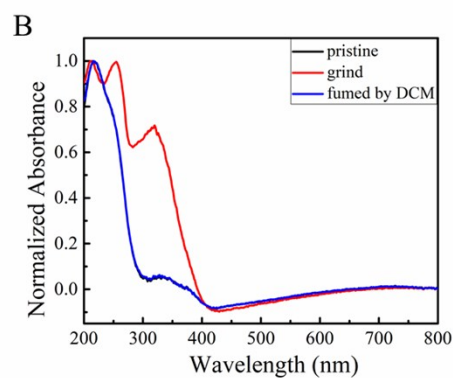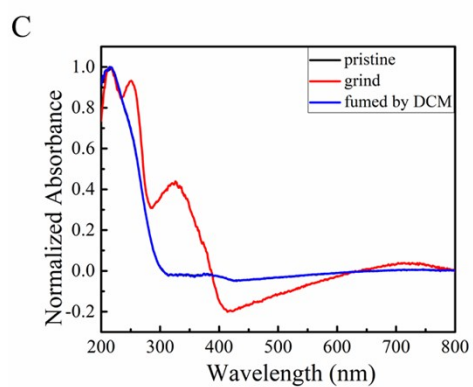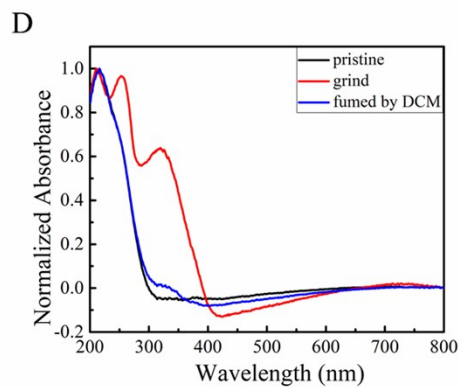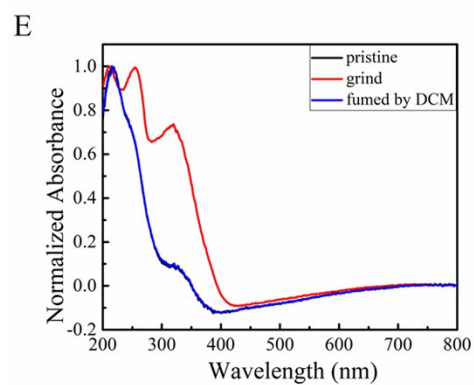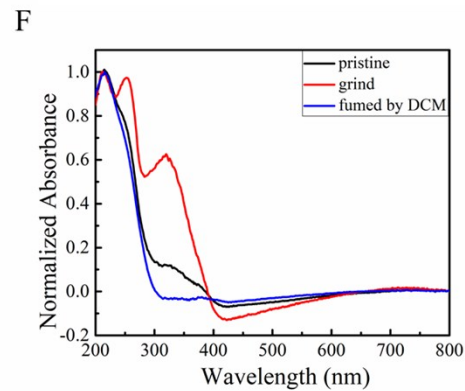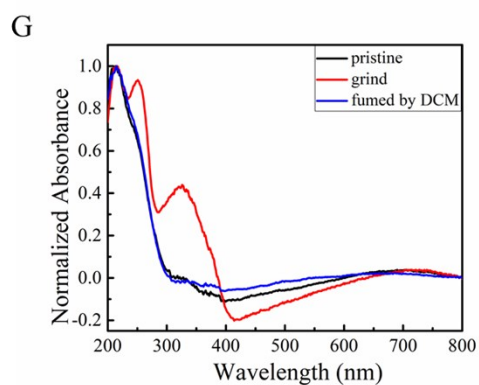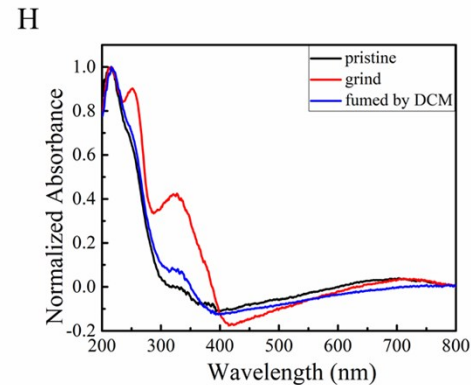

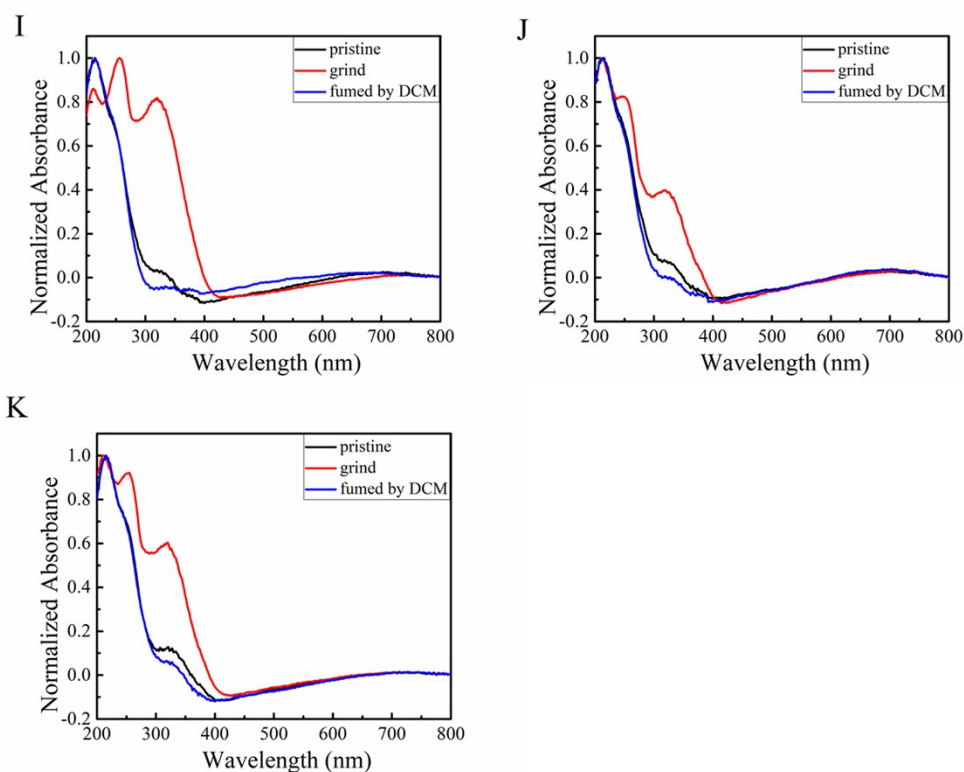

**Fig. S87** Solid UV absorption of TPE-2by-1-E (A) ,TPE-2by-1-Z (B), TPE-2by-2-E (C) ,TPE-2by-2-Z (D), TPE-2TZ-E (E) ,TPE-2TZ-Z (F), TPE-2EZ-E (G) , TPE-2EZ-Z (H), TPE-2B(I),TPE-2T(J) and TPE-2N(K) in different treatments.

| Name        | treatment    | $E_m$ (nm) | $\Delta\lambda$ (nm) | $\Phi_f$ (%) | $\tau$ (ns) | $k_r/10^8(s^{-1})$ | $k_{nr}/10^8(s^{-1})$ | $\Delta E$ (KJ/mol) |
|-------------|--------------|------------|----------------------|--------------|-------------|--------------------|-----------------------|---------------------|
| TPE-2by-1-E | pristine     | 458        | 29                   | 10           | 2.89        | 0.35               | 3.11                  | 379.79              |
|             | grind        | 487        |                      | 33.2         | 4.00        | 0.83               | 1.67                  |                     |
|             | fumed by DCM | 459        |                      | 9.8          | 2.89        | 0.34               | 3.12                  |                     |
| TPE-2by-1-Z | pristine     | 458        | 30                   | 14.1         | 3.10        | 0.46               | 2.78                  | 380.09              |
|             | grind        | 488        |                      | 34           | 4.02        | 0.85               | 1.64                  |                     |
|             | fumed by DCM | 459        |                      | 13.9         | 3.09        | 0.45               | 2.78                  |                     |

**Table S1.** Spectroscopic data for TPE-2by-1-E TPE-2by-1-Z.

| Name        | treatment    | $E_m$ (nm) | $\Delta\lambda$ (nm) | $\Phi_f$ (%) | $\tau$ (ns) | $k_r/10^8(s^{-1})$ | $k_{nr}/10^8(s^{-1})$ | $\Delta E$ (KJ/mol) |
|-------------|--------------|------------|----------------------|--------------|-------------|--------------------|-----------------------|---------------------|
| TPE-2by-2-E | pristine     | 466        | 22                   | 19.5         | 2.98        | 0.47               | 2.88                  | 379.91              |
|             | grind        | 488        |                      | 37.4         | 4.13        | 0.90               | 1.51                  |                     |
|             | fumed by DCM | 466        | 19                   | 2.98         | 0.48        | 2.98               |                       |                     |
| TPE-2by-2-Z | pristine     | 460        | 29                   | 22.1         | 3.12        | 0.71               | 2.50                  | 381.19              |
|             | grind        | 489        |                      | 37.7         | 4.23        | 0.89               | 1.47                  |                     |
|             | fumed by DCM | 460        | 21.7                 | 3.12         | 0.70        | 2.51               |                       |                     |

**Table S2.** Spectroscopic data for TPE-2by-2-E TPE-2by-2-Z.

| Name      | treatment    | $E_m$ (nm) | $\Delta\lambda$ (nm) | $\Phi_f$ (%) | $\tau$ (ns) | $k_r/10^8(s^{-1})$ | $k_{nr}/10^8(s^{-1})$ | $\Delta E$ (KJ/mol) |
|-----------|--------------|------------|----------------------|--------------|-------------|--------------------|-----------------------|---------------------|
| TPE-2TZ-E | pristine     | 448        | 40                   | 7.5          | 1.29        | 0.58               | 7.18                  | 394.58              |
|           | grind        | 488        |                      | 22.1         | 3.82        | 0.58               | 2.05                  |                     |
|           | fumed by DCM | 451        | 7.46                 | 1.28         | 0.59        | 7.17               |                       |                     |
| TPE-2TZ-E | pristine     | 443        | 48                   | 13.5         | 1.55        | 0.87               | 5.59                  | 395.248             |
|           | grind        | 491        |                      | 34.6         | 4.40        | 0.79               | 1.49                  |                     |
|           | fumed by DCM | 445        | 13                   | 1.53         | 0.85        | 5.60               |                       |                     |

**Table S3.** Spectroscopic data for TPE-2TZ-E TPE-2 TZ -Z.

| Name      | treatment    | $E_m$ (nm) | $\Delta\lambda$ (nm) | $\Phi_f$ (%) | $\tau$ (ns) | $k_r/10^8(s^{-1})$ | $k_{nr}/10^8(s^{-1})$ | $\Delta E$ (KJ/mol) |
|-----------|--------------|------------|----------------------|--------------|-------------|--------------------|-----------------------|---------------------|
| TPE-2EZ-E | pristine     | 437        | 51                   | 14.2         | 1.82        | 0.78               | 4.71                  | 410.39              |
|           | grind        | 488        |                      | 32.9         | 3.88        | 0.85               | 1.73                  |                     |
|           | fumed by DCM | 438        | 14.1                 | 1.78         | 0.78        | 4.72               |                       |                     |
| TPE-2EZ-Z | pristine     | 443        | 58                   | 25.1         | 3.20        | 0.79               | 2.34                  | 411.25              |
|           | grind        | 491        |                      | 38.4         | 4.40        | 0.87               | 1.40                  |                     |
|           | fumed by DCM | 445        | 24.9                 | 3.19         | 0.78        | 2.35               |                       |                     |

**Table S4.** Spectroscopic data for TPE-2EZ-E TPE-2 EZ -Z.



| Name   | treatment    | $E_m$ (nm) | $\Delta\lambda$ (nm) | $\Phi_f$ (%) | $\tau$ (ns) | $k_r/10^8(\text{s}^{-1})$ | $k_{nr}/10^8(\text{s}^{-1})$ |
|--------|--------------|------------|----------------------|--------------|-------------|---------------------------|------------------------------|
| TPE-2B | pristine     | 462        | 31                   | 21.2         | 3.71        | 0.579                     | 2.129                        |
|        | grind        | 493        |                      | 36.3         | 4.401       | 0.829                     | 1.45                         |
|        | fumed by DCM | 463        |                      | 20.4         | 3.69        | 0.559                     | 2.16                         |

**Table S5.** Spectroscopic data for TPE-2B.

| Name   | treatment    | $E_m$ (nm) | $\Delta\lambda$ (nm) | $\Phi_f$ (%) | $\tau$ (ns) | $k_r/10^8(\text{s}^{-1})$ | $k_{nr}/10^8(\text{s}^{-1})$ |
|--------|--------------|------------|----------------------|--------------|-------------|---------------------------|------------------------------|
| TPE-2T | pristine     | 462        | 33                   | 20.7         | 1.77        | 1.17                      | 4.49                         |
|        | grind        | 495        |                      | 27.3         | 4.017       | 0.68                      | 1.81                         |
|        | fumed by DCM | 462        |                      | 20.1         | 1.76        | 1.14                      | 4.53                         |

**Table S6.** Spectroscopic data for TPE-2T.

| Name   | treatment    | $E_m$ (nm) | $\Delta\lambda$ (nm) | $\Phi_f$ (%) | $\tau$ (ns) | $k_r/10^8(\text{s}^{-1})$ | $k_{nr}/10^8(\text{s}^{-1})$ |
|--------|--------------|------------|----------------------|--------------|-------------|---------------------------|------------------------------|
| TPE-2N | pristine     | 467        | 28                   | 9.8          | 3.23        | 0.30                      | 2.79                         |
|        | grind        | 495        |                      | 30.7         | 4.24        | 0.72                      | 1.63                         |
|        | fumed by DCM | 468        |                      | 9.6          | 3.23        | 0.30                      | 2.80                         |

**Table S7.** Spectroscopic data for TPE-2N.

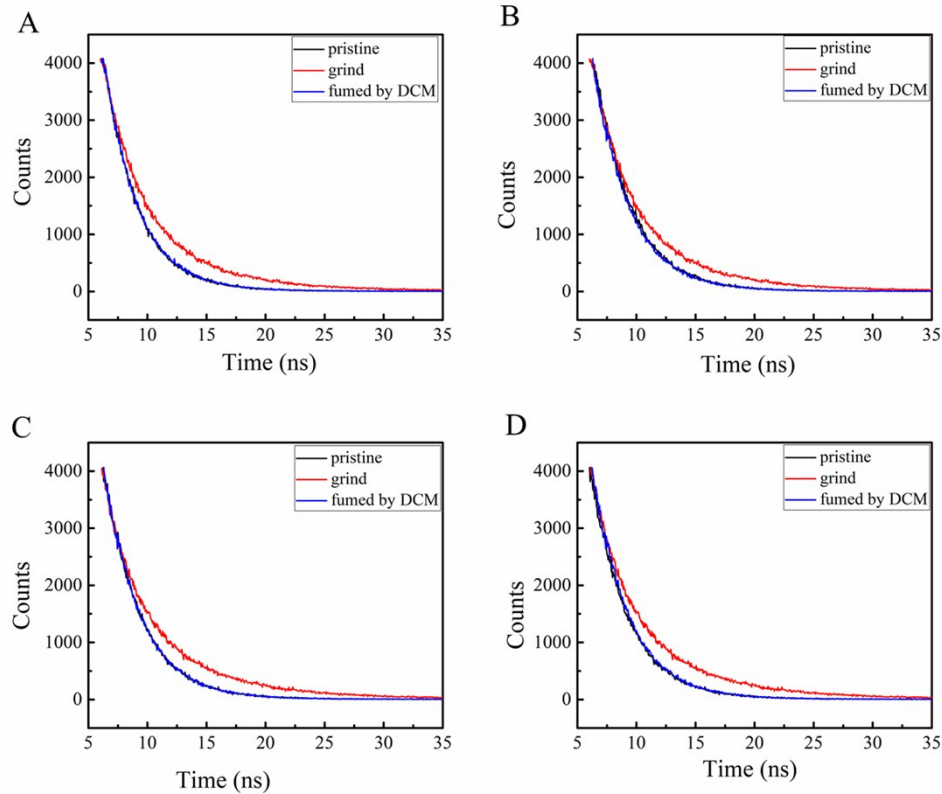



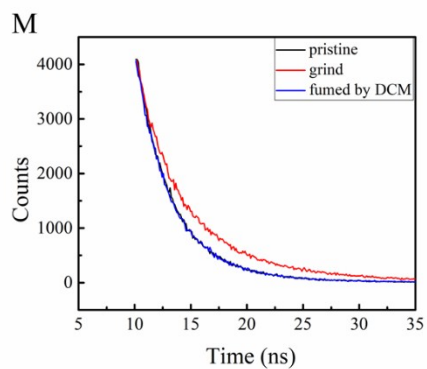

**Fig. S88** Fluorescence lifetime of TPE-2by-1-E (A) ,TPE-2by-1-Z (B), TPE-2by-2-E (C) ,TPE-2by-2-Z (D), TPE-2by-3-E (E) ,TPE-2by-3-Z (F),TPE-2TZ-E (G) ,TPE-2TZ-Z (H), TPE-2EZ-E (I) , TPE-2EZ-Z (J), TPE-2B(K),TPE-2T(L) and TPE-2N(M) in different treatments.

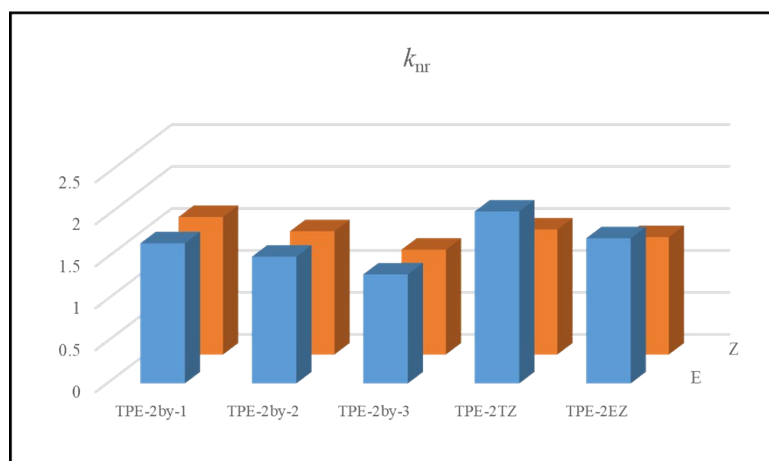

**Fig. S89** The non-radiative rate constant ( $k_{nr}$ ) histogram of all Z/E isomers.



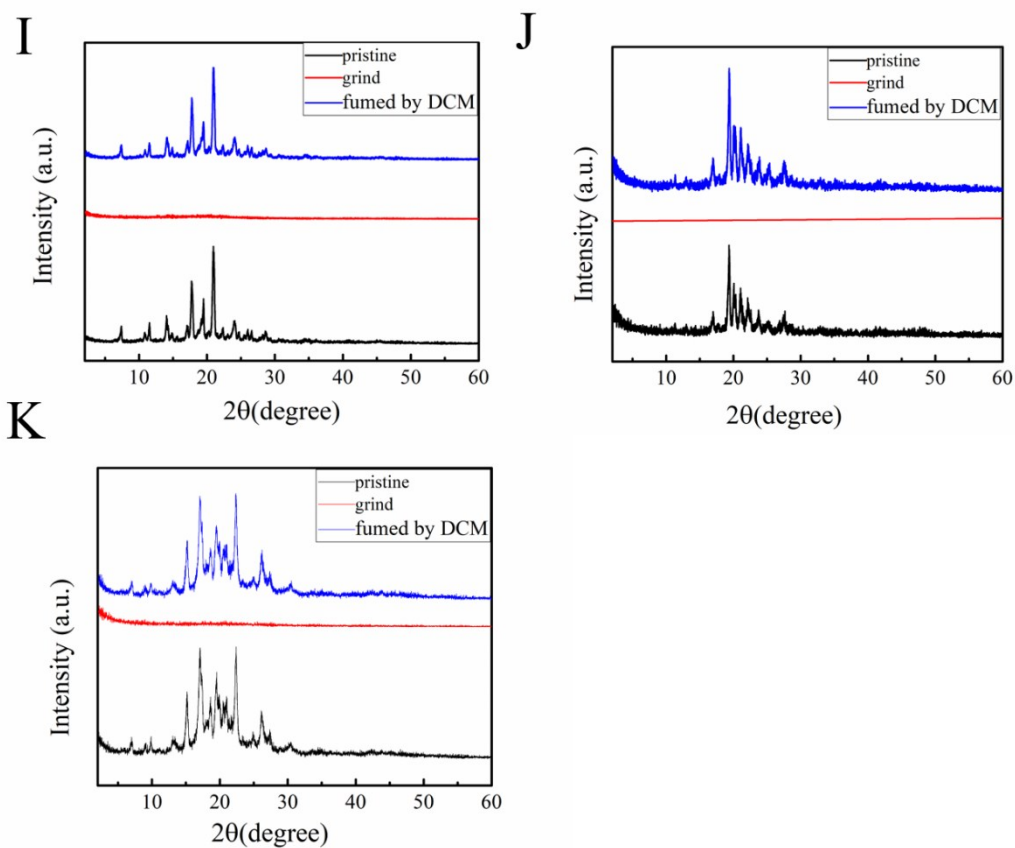

**Fig. S90** XRD patterns of TPE-2by-1-E (A), TPE-2by-1-Z (B), TPE-2by-2-E (C), TPE-2by-2-Z (D), TPE-2TZ-E (E), TPE-2TZ-Z (F), TPE-2EZ-E (G), TPE-2EZ-Z (H), TPE-2B (I), TPE-2T (J) and TPE-2N (K) in different treatments.

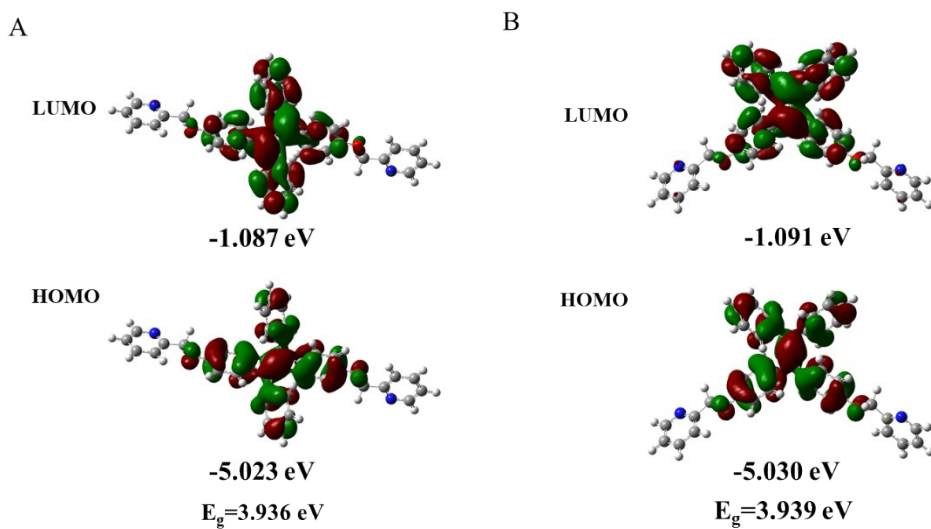

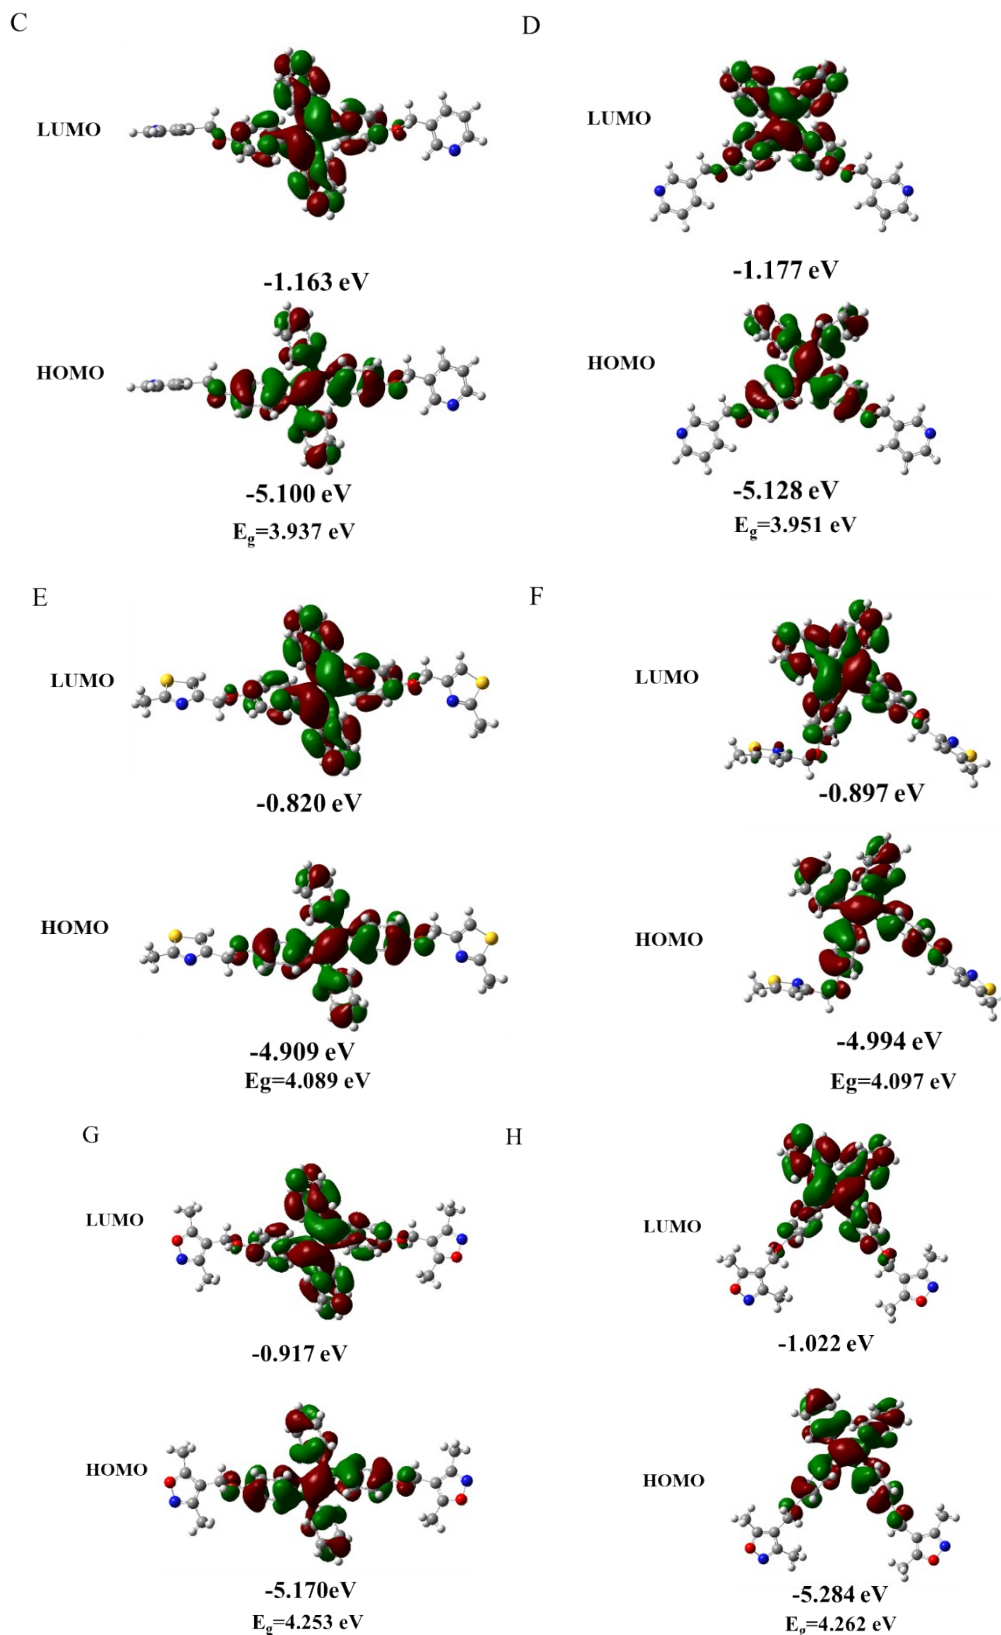

**Fig. S91** Energy levels of LUMO and HOMO, energy gaps, and electron cloud distributions of TPE-2by-1-E (A), TPE-2by-1-Z (B), TPE-2by-2-E (C), TPE-2by-2-Z (D), TPE-2TZ-E (E), TPE-2TZ-Z (F), TPE-2EZ-E (G), TPE-2EZ-Z (H).

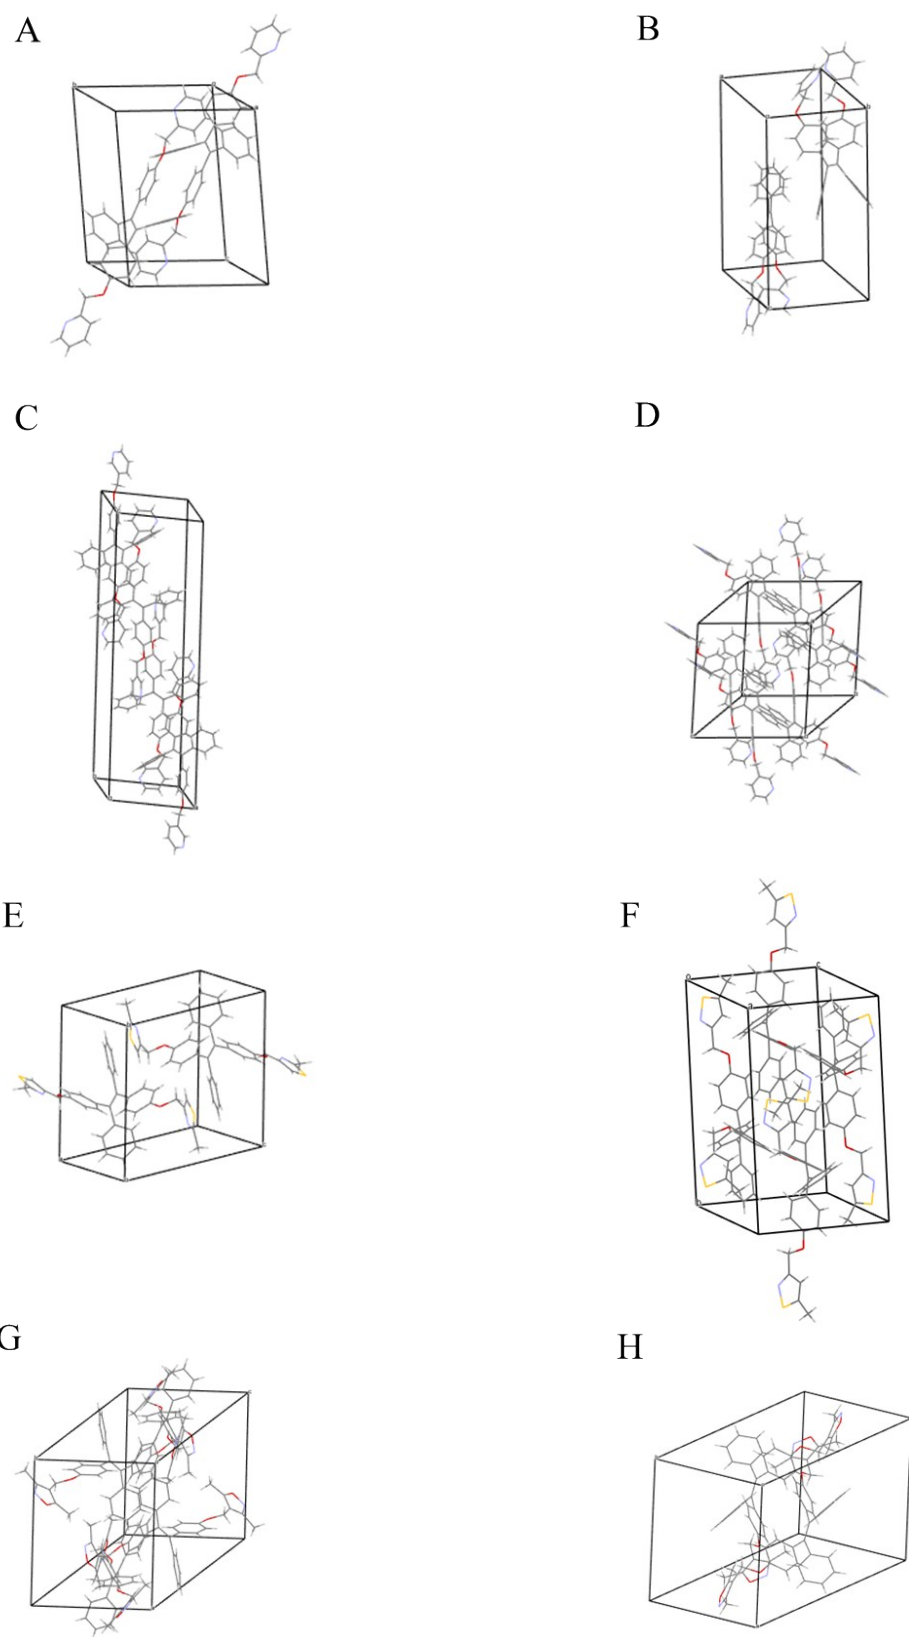

**Fig. S92** Packing structures of single crystal about TPE-2by-1-E (A) ,TPE-2by-1-Z (B), TPE-2by-2-E (C) ,TPE-2by-2-Z (D), TPE-2TZ-E (E) ,TPE-2TZ-Z (F), TPE-2EZ-E (G) and TPE-2EZ-Z (H).

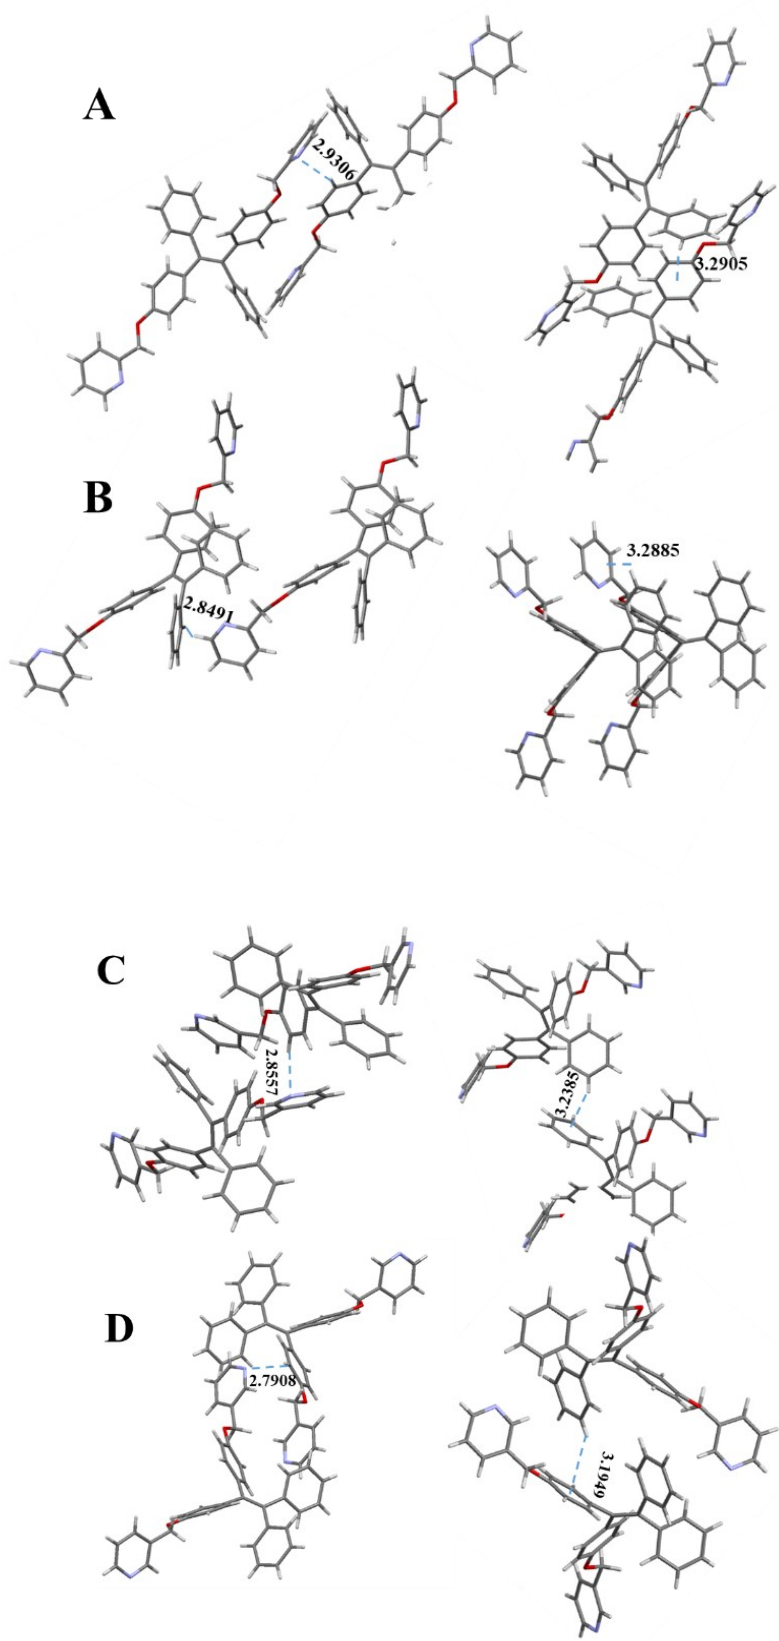



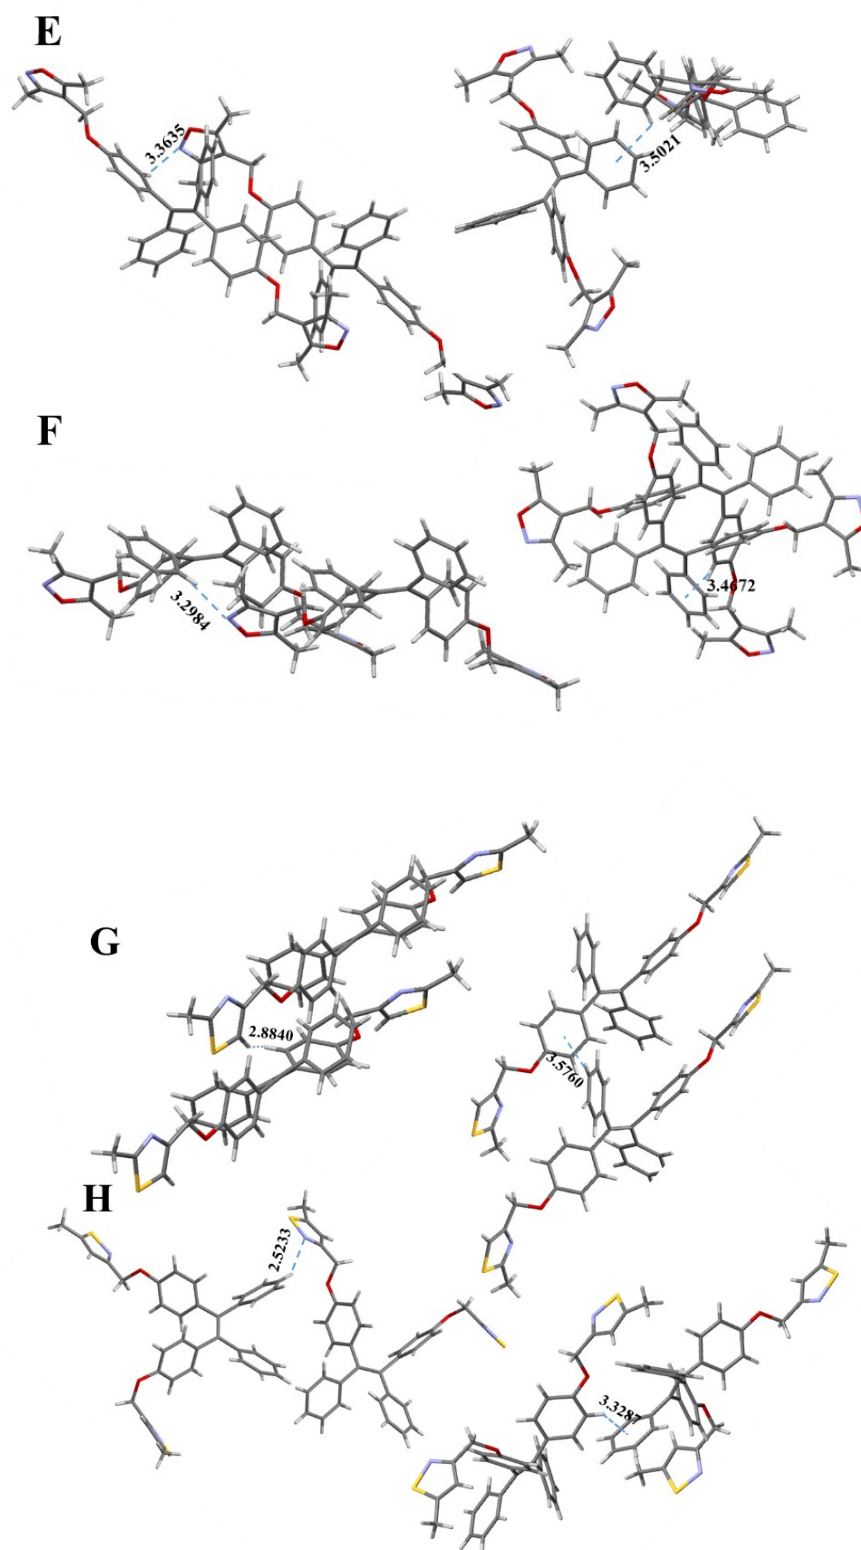

**Fig. S93** Intermolecular interactions of TPE-2by-1-E (A) ,TPE-2by-1-Z (B), TPE-2by-2-E (C) ,TPE-2by-2-Z (D), TPE-2TZ-E (E) ,TPE-2TZ-Z (F), TPE-2EZ-E (G) and TPE-2EZ-Z (H).
